# Supplementary material for: Integrated Approach of Life Cycle Assessment and Experimental Design in the Study of a Model Organic Reaction: New Perspectives in Renewable Vanillin-Derived Chemicals
Source: MDPI journal article supplement (doi:10.3390/molecules29092132), 2024-05-03
Supplement: s1 [file s1]

## SUPPORTING INFORMATION

### **Integrated approach of Life Cycle Assessment and Experimental Design in the study of an organic synthesis**

*Chiara Ruini<sup>1\*</sup>, Erika Ferrari<sup>2</sup>, Caterina Durante<sup>2</sup>, Giulia Lanciotti<sup>2</sup>, Paolo Neri<sup>1</sup>, Anna Maria Ferrari<sup>1,3</sup>, Roberto Rosa<sup>1,3,4</sup>*

<sup>1</sup>Department of Sciences and Methods for Engineering, University of Modena and Reggio Emilia, v. Amendola 2, 42122 Reggio Emilia, Italy

<sup>2</sup>Department of Chemical and Geological Sciences, University of Modena and Reggio Emilia, v. Campi 103, 41125 Modena, Italy

<sup>3</sup>Interdepartmental Center En&Tech, University of Modena and Reggio Emilia, Tecnopolo di Reggio Emilia, Piazzale Europa 1, 42123 Reggio Emilia, Italy

<sup>4</sup>Department of Economics, Science, Engineering and Design, University of San Marino Republic, v. Consiglio dei Sessanta 99, 47891 Dogana, Republic of San Marino

\*corresponding author: chiara.ruini@unimore.it

Pages: 83

Figures: 5

Tables: 42

## FIGURES

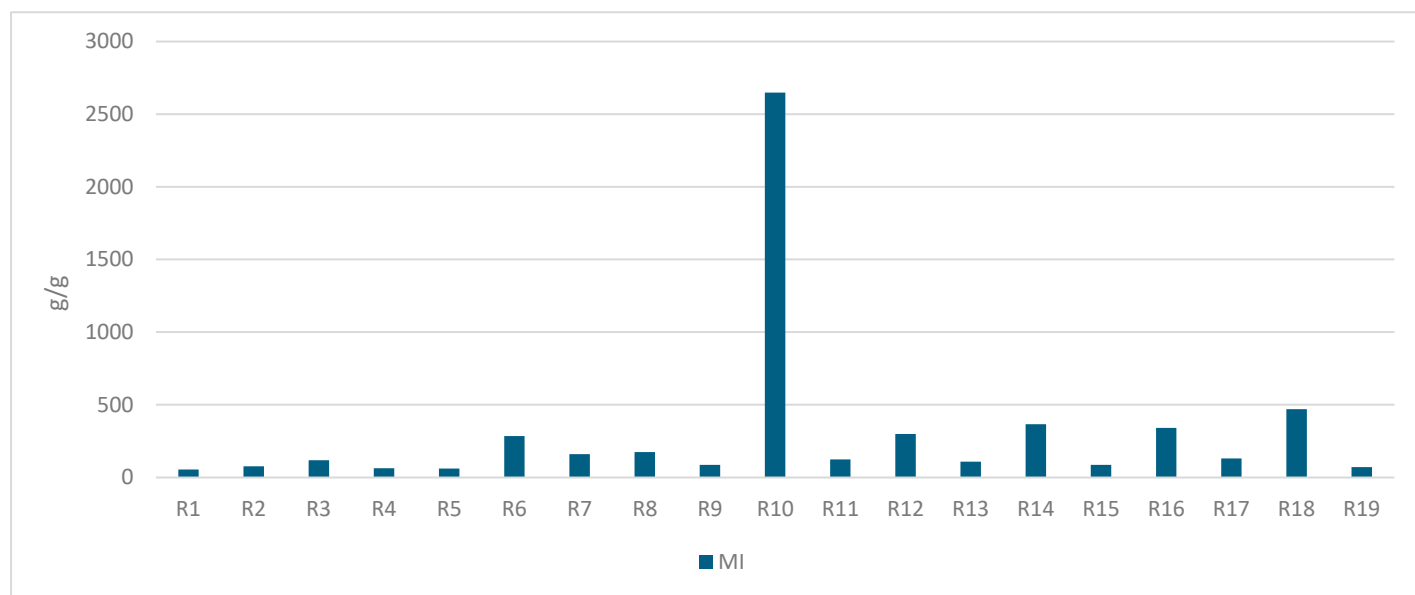

**Figure S1.** Mass intensity (g/g) results for all the nineteen performed reactions.

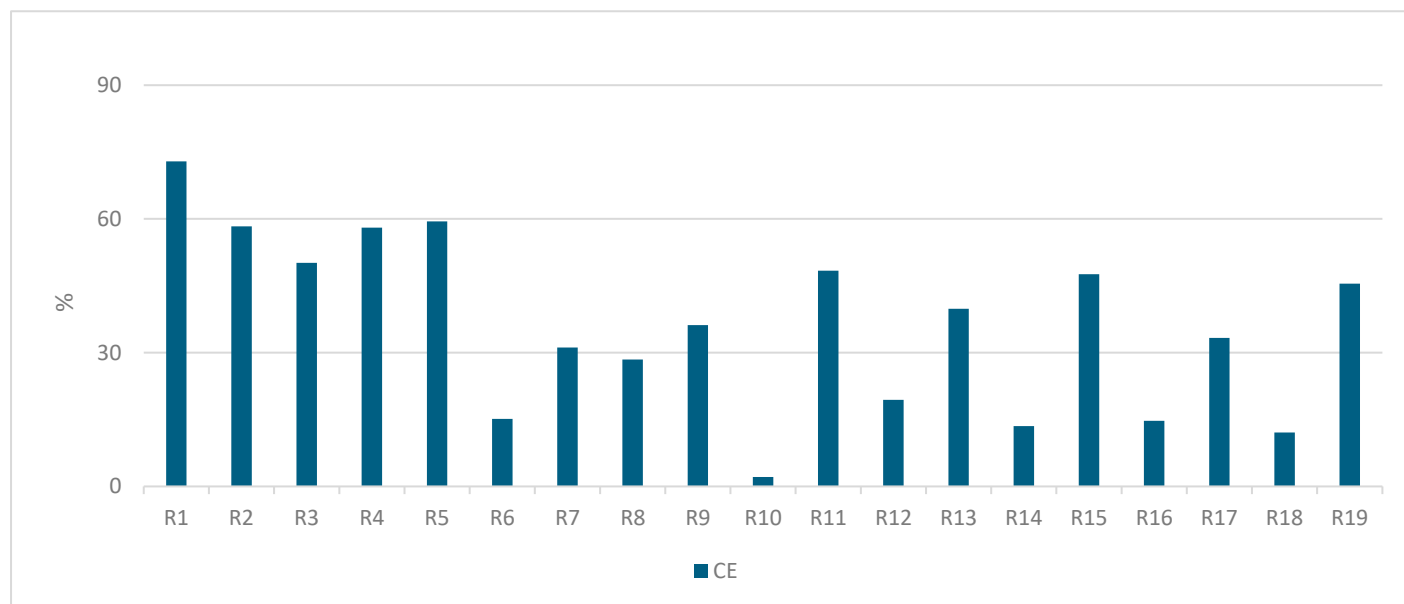

**Figure S2.** Carbon efficiency (%) results for all the nineteen performed reactions.

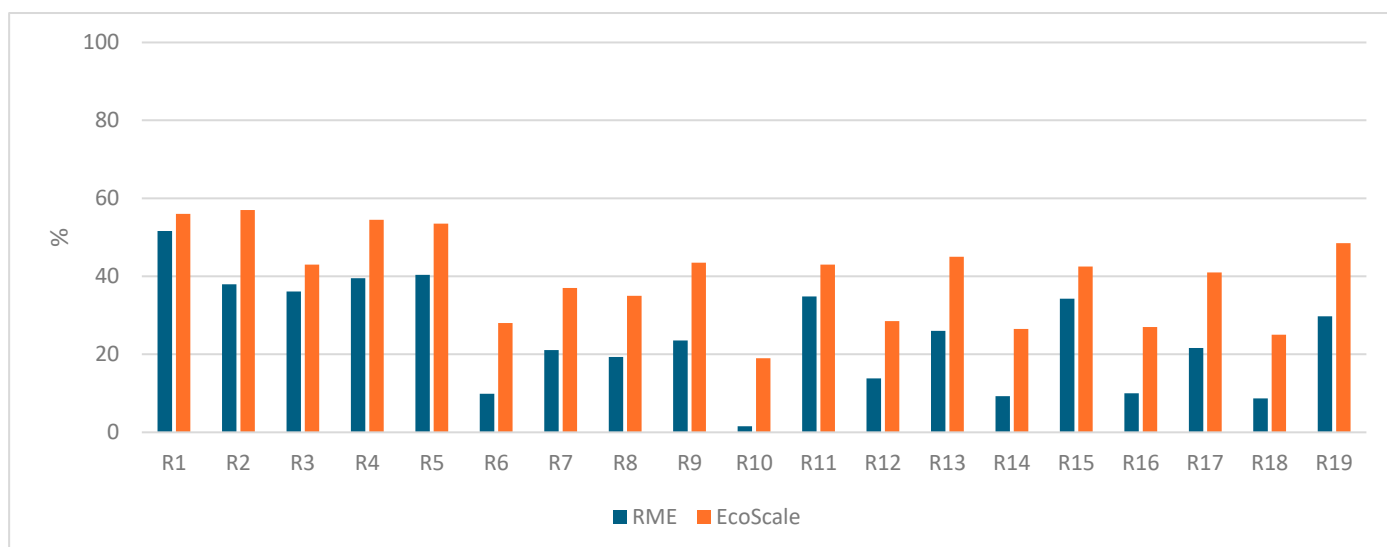

**Figure S3.** Reaction Mass Efficiency and EcoScale (%) results for all the nineteen performed reactions.

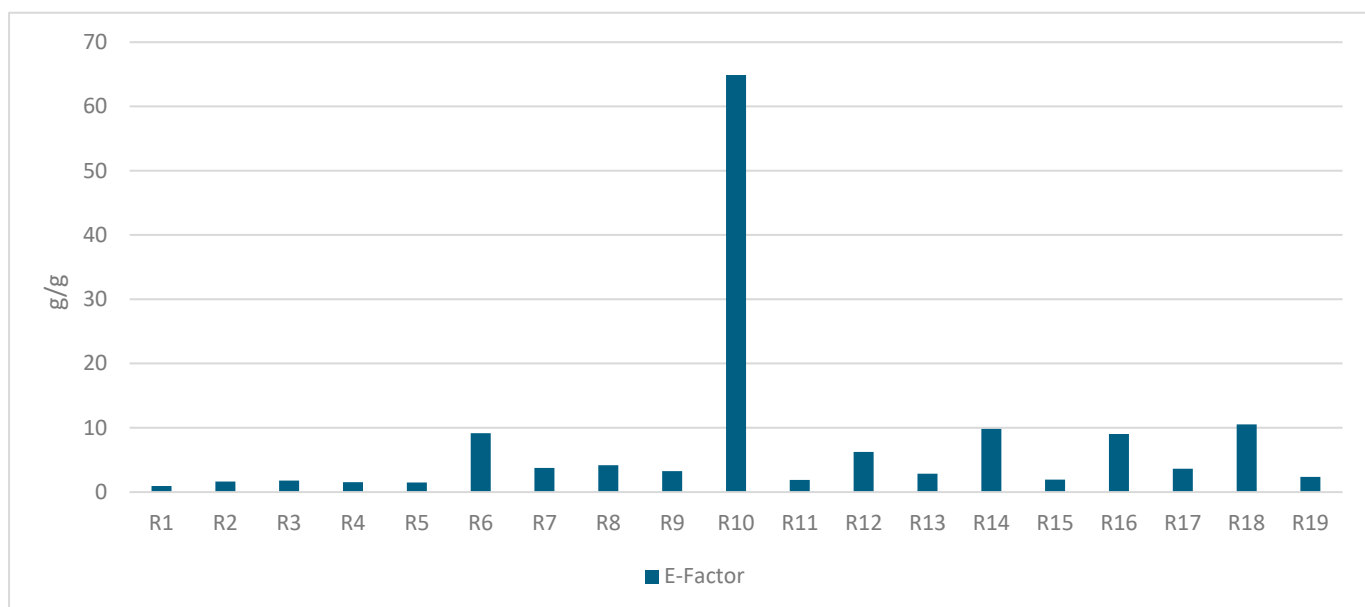

**Figure S4.** E-factor (g/g) results for all the nineteen performed reactions.

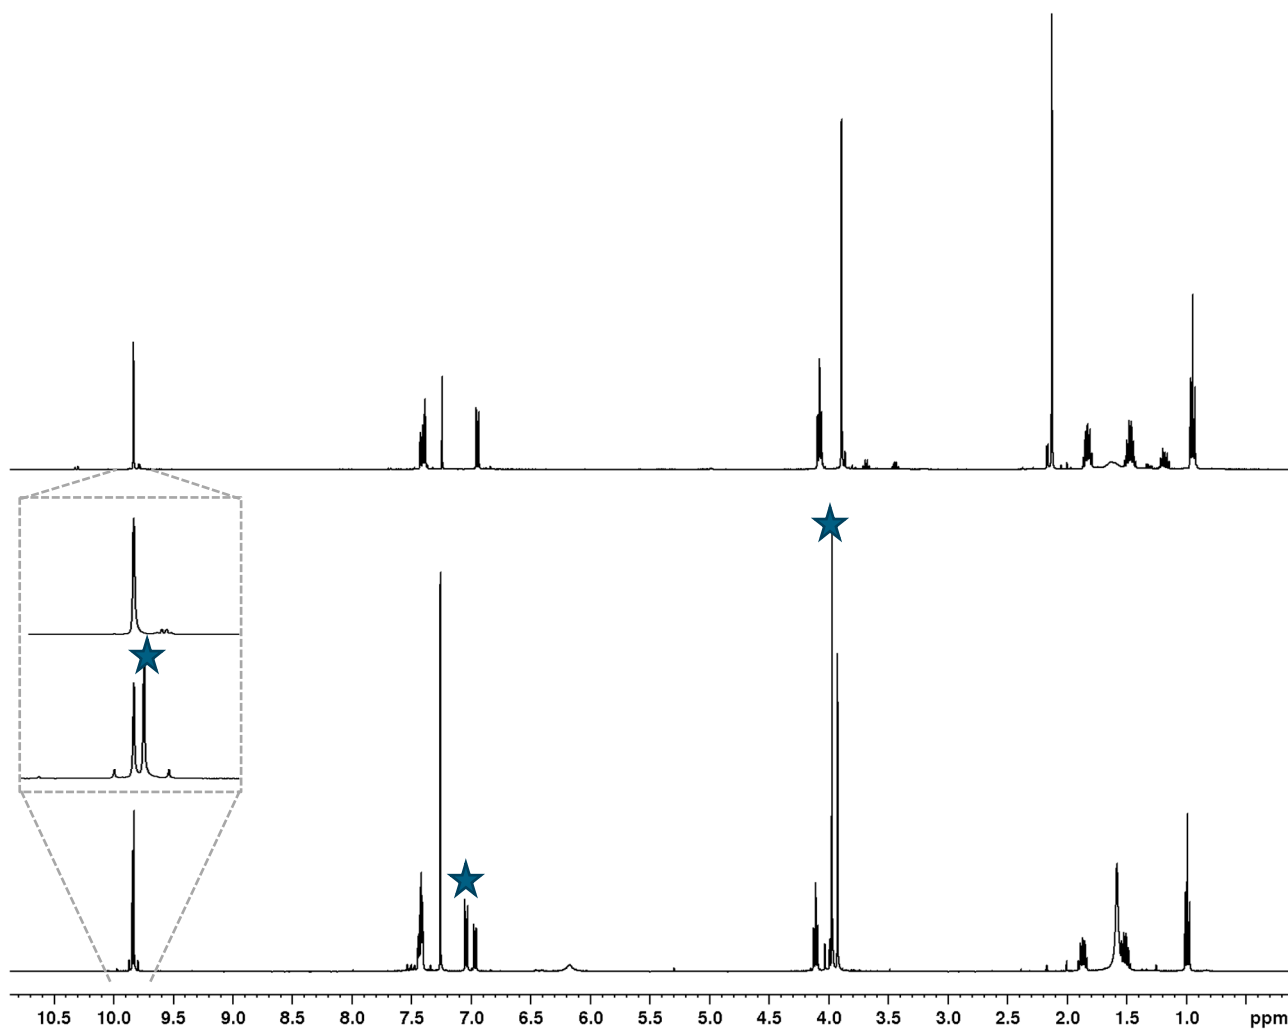

**Figure S5.**  $^1\text{H}$  NMR spectra of pure product 4-butoxy-3-methoxybenzaldehyde (top) and reaction crude (bottom). Blue stars highlight typical signals of pure vanillin. (298 K, 400 MHz).

## TABLES

**Table S1.** Experimental details for each synthesis run together with experimental yield of pure 4-butoxy-3-methoxybenzaldehyde (%).

| Experiment | Solvent<br>(V/mL) | t<br>(h) | T<br>(°C) | Vanillin<br>(g) | BrBu<br>(g) | KI (g) | K <sub>2</sub> CO <sub>3</sub><br>(g) | Yield<br>(%) |
|------------|-------------------|----------|-----------|-----------------|-------------|--------|---------------------------------------|--------------|
| R1         | DMF (5mL)         | 8        | 100       | 0.5199          | 0.5262      | 1.0221 | 0.435                                 | 76           |
| R2         | ACN (20mL)        | 24       | 80        | 0.5010          | 0.9083      | 1.0579 | 0.4710                                | 78           |
| R3         | Ace (20 mL)       | 24       | 50        | 0.5027          | 0.4527      | 1.0191 | 0.5185                                | 50           |
| R4         | DMF (5mL)         | 16       | 100       | 0.5085          | 0.6754      | 0.5594 | 0.6917                                | 73           |
| R5         | DMF (5mL)         | 16       | 100       | 0.5085          | 0.6851      | 0.5332 | 0.6705                                | 71           |
| R6         | Ace (20 mL)       | 8        | 50        | 0.5057          | 0.9220      | /      | 0.4591                                | 20           |
| R7         | Ace (20 mL)       | 16       | 50        | 0.5039          | 0.6991      | 0.5257 | 0.7294                                | 38           |
| R8         | Ace (20 mL)       | 16       | 50        | 0.5091          | 0.6932      | 0.5560 | 0.7440                                | 34           |
| R9         | DMF (5mL)         | 24       | 100       | 0.5162          | 0.9314      | /      | 0.9201                                | 51           |
| R10        | Ace (20 mL)       | 8        | 50        | 0.5186          | 0.4765      | /      | 0.9117                                | 2            |
| R11        | ACN (20 mL)       | 8        | 80        | 0.5004          | 0.4513      | 1.0900 | 0.9200                                | 50           |
| R12        | Ace (20 mL)       | 24       | 50        | 0.5045          | 0.4928      | 1.1596 | 0.9074                                | 21           |
| R13        | ACN (20 mL)       | 24       | 80        | 0.5181          | 0.9221      | /      | 0.9136                                | 54           |
| R14        | ACN (20 mL)       | 16       | 80        | 0.5197          | 0.6796      | 0.6494 | 0.6765                                | 17           |
| R15        | DMF (5mL)         | 24       | 100       | 0.5044          | 0.4564      | /      | 0.4525                                | 49           |
| R16        | ACN (20 mL)       | 16       | 80        | 0.5027          | 0.6872      | 0.5431 | 0.6834                                | 18           |
| R17        | Ace (20 mL)       | 8        | 50        | 0.5122          | 0.9474      | 1.1229 | 0.4579                                | 46           |
| R18        | ACN (20 mL)       | 8        | 80        | 0.5033          | 0.4656      | /      | 0.4506                                | 14           |
| R19        | DMF (5 mL)        | 8        | 100       | 0.5278          | 0.9276      | 1.0654 | 0.9167                                | 61           |

**Table S2.** Life Cycle assessment Midpoint results (ReCiPe 2016; H) for all the nineteen reactions.

| Reaction | GWP      | SOD      | IR       | OFHH     | FPMF     | OFT      | TA       | FE       | ME       | TE       | FET      | MET      | HCT      | HNCT     | LU       | MRS      | FRS      | WC       |
|----------|----------|----------|----------|----------|----------|----------|----------|----------|----------|----------|----------|----------|----------|----------|----------|----------|----------|----------|
| R1       | 1.84E+01 | 6.56E-06 | 8.47E-01 | 3.12E-02 | 1.79E-02 | 3.39E-02 | 4.89E-02 | 6.16E-03 | 3.73E-04 | 6.93E+01 | 6.85E-01 | 9.04E-01 | 1.23E+00 | 1.30E+01 | 4.24E-01 | 6.25E-02 | 7.62E+00 | 2.03E-01 |
| R2       | 2.19E+01 | 8.71E-06 | 1.18E+00 | 3.79E-02 | 2.31E-02 | 4.07E-02 | 6.31E-02 | 7.38E-03 | 5.74E-04 | 9.22E+01 | 8.86E-01 | 1.17E+00 | 1.72E+00 | 1.71E+01 | 5.40E-01 | 8.46E-02 | 8.56E+00 | 2.65E-01 |
| R3       | 3.17E+01 | 1.18E-05 | 1.55E+00 | 5.51E-02 | 3.35E-02 | 5.93E-02 | 9.06E-02 | 1.08E-02 | 6.36E-04 | 1.40E+02 | 1.31E+00 | 1.74E+00 | 2.59E+00 | 2.53E+01 | 7.53E-01 | 1.29E-01 | 1.26E+01 | 3.61E-01 |
| R4       | 2.35E+01 | 9.15E-06 | 1.23E+00 | 4.04E-02 | 2.40E-02 | 4.35E-02 | 6.55E-02 | 7.88E-03 | 5.02E-04 | 9.30E+01 | 9.13E-01 | 1.21E+00 | 1.70E+00 | 1.75E+01 | 5.73E-01 | 8.47E-02 | 9.39E+00 | 2.79E-01 |
| R5       | 2.28E+01 | 8.87E-06 | 1.19E+00 | 3.92E-02 | 2.33E-02 | 4.22E-02 | 6.36E-02 | 7.65E-03 | 4.87E-04 | 9.02E+01 | 8.86E-01 | 1.17E+00 | 1.65E+00 | 1.70E+01 | 5.56E-01 | 8.22E-02 | 9.11E+00 | 2.71E-01 |
| R6       | 6.68E+01 | 2.25E-05 | 2.83E+00 | 1.13E-01 | 6.45E-02 | 1.23E-01 | 1.76E-01 | 2.23E-02 | 1.23E-03 | 2.58E+02 | 2.50E+00 | 3.30E+00 | 4.55E+00 | 4.72E+01 | 1.49E+00 | 2.32E-01 | 2.78E+01 | 7.01E-01 |
| R7       | 4.01E+01 | 1.43E-05 | 1.84E+00 | 6.87E-02 | 4.06E-02 | 7.43E-02 | 1.10E-01 | 1.35E-02 | 7.72E-04 | 1.67E+02 | 1.59E+00 | 2.10E+00 | 3.02E+00 | 3.03E+01 | 9.26E-01 | 1.52E-01 | 1.63E+01 | 4.39E-01 |
| R8       | 4.41E+01 | 1.57E-05 | 2.02E+00 | 7.56E-02 | 4.47E-02 | 8.18E-02 | 1.21E-01 | 1.49E-02 | 8.49E-04 | 1.83E+02 | 1.74E+00 | 2.30E+00 | 3.32E+00 | 3.33E+01 | 1.02E+00 | 1.67E-01 | 1.79E+01 | 4.83E-01 |
| R9       | 2.91E+01 | 1.04E-05 | 1.34E+00 | 4.92E-02 | 2.82E-02 | 5.34E-02 | 7.73E-02 | 9.71E-03 | 5.90E-04 | 1.09E+02 | 1.08E+00 | 1.43E+00 | 1.94E+00 | 2.05E+01 | 6.71E-01 | 9.88E-02 | 1.20E+01 | 3.21E-01 |
| R10      | 6.60E+02 | 2.34E-04 | 3.01E+01 | 1.12E+00 | 6.40E-01 | 1.21E+00 | 1.75E+00 | 2.20E-01 | 1.24E-02 | 2.47E+03 | 2.44E+01 | 3.22E+01 | 4.39E+01 | 4.62E+02 | 1.51E+01 | 2.23E+00 | 2.73E+02 | 7.25E+00 |
| R11      | 2.89E+01 | 1.01E-05 | 1.29E+00 | 4.87E-02 | 2.79E-02 | 5.29E-02 | 7.66E-02 | 9.64E-03 | 7.37E-04 | 1.09E+02 | 1.08E+00 | 1.42E+00 | 1.94E+00 | 2.03E+01 | 6.59E-01 | 9.88E-02 | 1.20E+01 | 3.13E-01 |
| R12      | 7.97E+01 | 2.96E-05 | 3.88E+00 | 1.38E-01 | 8.40E-02 | 1.49E-01 | 2.27E-01 | 2.71E-02 | 1.60E-03 | 3.52E+02 | 3.29E+00 | 4.36E+00 | 6.50E+00 | 6.34E+01 | 1.89E+00 | 3.23E-01 | 3.16E+01 | 9.05E-01 |
| R13      | 3.19E+01 | 1.26E-05 | 1.71E+00 | 5.53E-02 | 3.36E-02 | 5.94E-02 | 9.18E-02 | 1.08E-02 | 8.32E-04 | 1.34E+02 | 1.29E+00 | 1.70E+00 | 2.49E+00 | 2.49E+01 | 7.83E-01 | 1.23E-01 | 1.25E+01 | 3.86E-01 |
| R14      | 1.01E+02 | 3.88E-05 | 5.18E+00 | 1.73E-01 | 1.03E-01 | 1.86E-01 | 2.81E-01 | 3.38E-02 | 2.61E-03 | 3.98E+02 | 3.90E+00 | 5.15E+00 | 7.27E+00 | 7.48E+01 | 2.43E+00 | 3.63E-01 | 4.05E+01 | 1.19E+00 |
| R15      | 3.69E+01 | 1.53E-05 | 2.10E+00 | 6.42E-02 | 3.90E-02 | 6.87E-02 | 1.07E-01 | 1.24E-02 | 8.18E-04 | 1.52E+02 | 1.48E+00 | 1.96E+00 | 2.83E+00 | 2.87E+01 | 9.36E-01 | 1.39E-01 | 1.43E+01 | 4.64E-01 |
| R16      | 9.21E+01 | 3.56E-05 | 4.76E+00 | 1.58E-01 | 9.38E-02 | 1.70E-01 | 2.57E-01 | 3.08E-02 | 2.40E-03 | 3.64E+02 | 3.57E+00 | 4.71E+00 | 6.66E+00 | 6.84E+01 | 2.23E+00 | 3.32E-01 | 3.68E+01 | 1.09E+00 |
| R17      | 3.01E+01 | 1.01E-05 | 1.27E+00 | 5.09E-02 | 2.91E-02 | 5.53E-02 | 7.93E-02 | 1.01E-02 | 5.53E-04 | 1.16E+02 | 1.13E+00 | 1.49E+00 | 2.05E+00 | 2.13E+01 | 6.71E-01 | 1.05E-01 | 1.25E+01 | 3.16E-01 |
| R18      | 1.14E+02 | 3.98E-05 | 5.09E+00 | 1.93E-01 | 1.11E-01 | 2.09E-01 | 3.03E-01 | 3.82E-02 | 2.91E-03 | 4.33E+02 | 4.25E+00 | 5.62E+00 | 7.67E+00 | 8.05E+01 | 2.60E+00 | 3.91E-01 | 4.74E+01 | 1.24E+00 |
| R19      | 2.33E+01 | 8.29E-06 | 1.07E+00 | 3.95E-02 | 2.26E-02 | 4.28E-02 | 6.19E-02 | 7.80E-03 | 4.72E-04 | 8.77E+01 | 8.66E-01 | 1.14E+00 | 1.56E+00 | 1.64E+01 | 5.35E-01 | 7.91E-02 | 9.64E+00 | 2.57E-01 |

The impact categories considered by the impact assessment method are: Global warming (GW, kg CO<sub>2</sub> eq), stratospheric ozone depletion (SOD, kg CFC-11 eq), ionizing radiation (IR, kBq Co-60 eq), ozone formation-human health (OFHH, kg NO<sub>x</sub> eq), fine particulate matter formation (FPMF, kg PM<sub>2.5</sub> eq), ozone formation-terrestrial ecosystems (OFTE, kg NO<sub>x</sub> eq), terrestrial acidification (TA, kg SO<sub>2</sub> eq), freshwater eutrophication (FE, kg P eq), marine eutrophication (ME, kg N eq), terrestrial ecotoxicity (TE, kg 1,4-DCB), freshwater ecotoxicity (FET, kg 1,4-DCB), marine ecotoxicity (MET, kg 1,4-DCB), human carcinogenic toxicity (HCT, kg 1,4-DCB), human non-carcinogenic toxicity (HNCT, kg 1,4-DCB), land use (LU, m<sup>2</sup>a crop eq), mineral resource scarcity (MRS, kg Cu eq), fossil resource scarcity (FRS, kg oil eq), and water consumption (WC, m<sup>3</sup>).

**Table S3.** Contributions to the Life Cycle Inventory (LCI) for the production of 1p of the aspiration system. The aspiration system, with an air flow rate of 250 m<sup>3</sup>/h was considered composed of an electric ventilator, a hood, a chimney and a channel. The lifetime of the electric ventilator was assumed to be 18000 h, while the one of the aspiration system was assumed to be 79750 h.

| Description |             |                            | Amount    | Process data source            |
|-------------|-------------|----------------------------|-----------|--------------------------------|
| Input       | Materials   | Steel                      | 25.24 kg  | Ecoinvent v. 3.9 <sup>1</sup>  |
|             |             | Copper                     | 8.41 kg   | Ecoinvent v. 3.9 <sup>2</sup>  |
|             |             | Aluminum                   | 4.21 kg   | Ecoinvent v. 3.9 <sup>3</sup>  |
|             |             | PVC                        | 4.21 kg   | Ecoinvent v. 3.9 <sup>4</sup>  |
|             |             | Steel                      | 20.93 kg  | Ecoinvent v. 3.9 <sup>5</sup>  |
|             |             | Steel                      | 206.09 kg | Ecoinvent v. 3.9 <sup>6</sup>  |
|             |             | Steel                      | 115.93 kg | Ecoinvent v. 3.9 <sup>7</sup>  |
|             | Processing  | Forming steel              | 25.24 kg  | Ecoinvent v. 3.9 <sup>8</sup>  |
|             |             | Forming copper             | 8.41 kg   | Ecoinvent v. 3.9 <sup>9</sup>  |
|             |             | Forming aluminum           | 4.21 kg   | Ecoinvent v. 3.9 <sup>10</sup> |
|             |             | Forming PVC                | 4.21 kg   | Ecoinvent v. 3.9 <sup>11</sup> |
|             |             | Forming steel              | 342.95 kg | Ecoinvent v. 3.9 <sup>12</sup> |
|             | Transport   | Transport of raw materials | 38.50 tkm | Ecoinvent v. 3.9 <sup>13</sup> |
| Output      | End of life | Recycling of steel         | 25.24 kg  | Ecoinvent v. 3.9 <sup>14</sup> |
|             |             | Recycling of copper        | 8.41 kg   | Ecoinvent v. 3.9 <sup>15</sup> |
|             |             | Recycling of Aluminum      | 4.21 kg   | Ecoinvent v. 3.9 <sup>16</sup> |
|             |             | Recycling of plastic       | 4.21 kg   | Ecoinvent v. 3.9 <sup>17</sup> |
|             |             | Recycling of steel         | 342.95 kg | Ecoinvent v. 3.9 <sup>18</sup> |

<sup>1</sup>60% of the weight of the electric ventilator was supposed to be steel. The Ecoinvent process used was: Reinforcing steel {GLO}| market for | APOS, U.

<sup>2</sup>20% of the weight of the electric ventilator was supposed to be copper. The Ecoinvent process used was: Copper-rich materials {GLO}| copper, anode to generic market for copper-rich materials | APOS, U.

<sup>3</sup>10% of the weight of the electric ventilator was supposed to be aluminum. The Ecoinvent process used was: Aluminium, primary, ingot {RoW}| market for | APOS, U.

<sup>4</sup>10% of the weight of the electric ventilator was supposed to be polyvinylchloride. The Ecoinvent process used was: Polyvinylchloride, bulk polymerised {GLO}| market for | APOS, U.

<sup>5</sup>Steel of the hood. The Ecoinvent process used was: Reinforcing steel {GLO}| market for | APOS, U.

<sup>6</sup>Steel of the channel connecting the electric ventilator to the hood. The Ecoinvent process used was: Reinforcing steel {GLO}| market for | APOS, U.

<sup>7</sup>Steel of the channel connecting the electric ventilator to the exit. The Ecoinvent process used was: Reinforcing steel {GLO}| market for | APOS, U.

<sup>8</sup>Forming of the steel composing the electric ventilator. The Ecoinvent process used was: Section bar rolling, steel {GLO}| market for | APOS, U.

<sup>9</sup>Forming of the copper composing the electric ventilator. The Ecoinvent process used was: Wire drawing, steel {GLO}| market for | APOS, U.

<sup>10</sup>Forming of the aluminum composing the electric ventilator. The Ecoinvent process used was: Section bar extrusion, aluminium {GLO}| market for | APOS, U.

<sup>11</sup>Forming of the polyvinylchloride composing the electric ventilator. The Ecoinvent process used was: Blow moulding {GLO}| market for | APOS, U.

<sup>12</sup>Forming of the steel channel. The Ecoinvent process used was: Section bar rolling, steel {GLO}| market for | APOS, U.

<sup>13</sup>The Ecoinvent process used was: Transport, freight, lorry 16-32 metric ton, EURO6 {RoW}| transport, freight, lorry 16-32 metric ton, EURO6 | APOS, U. An average distance of 100 km was considered.

<sup>14</sup>The recycling process for steel was modified by the authors. Particularly a new multi-output process was created with the input of 1 kg of steel (the Ecoinvent process used was Steel, low-alloyed {RER}| steel production, electric, low-alloyed | APOS, U). The main product of the process created was the recycling treatment of 1.105 kg of steel, while the co-product was 1 kg of secondary steel. The environmental loads were allocated to both the recycling process and the secondary recycled steel obtained with a contribution of 50 % each. The process comprised also the end of life of the remaining scraps (the Ecoinvent process used was Scrap steel {CH}| treatment of, inert material landfill | APOS, U).

<sup>15</sup>The recycling process for copper was modified by the authors. Particularly a new process was created with the inputs taken from the Ecoinvent database process named Copper, cathode {RoW}| treatment of metal part of electronic scrap, in copper, anode, by electrolytic refining | APOS, U. However, the environmental loads were allocated to both the recycling process and the secondary recycled copper with a contribution of 50 % each.

<sup>16</sup>The recycling process for aluminum was modified by the authors. Particularly a new process was created with the inputs taken from the Ecoinvent database process named Aluminium, wrought alloy {RER}| treatment of aluminium scrap, new, at remelter | APOS, U. However, the environmental loads were allocated to both the recycling process and the secondary recycled copper with a contribution of 50 % each.

<sup>17</sup>The recycling process for plastic was modified by the authors. Particularly a new process was created with the inputs taken from the Ecoinvent database process of the Polypropylene recycling. However, the environmental loads were allocated to both the recycling process and the secondary recycled plastic with a contribution of 50 % each.

<sup>18</sup>The recycling process for steel was modified by the authors. A new multi-output process was created with the input of 1 kg of steel (the Ecoinvent process used was Steel, low-alloyed {RER}| steel production, electric, low-alloyed | APOS, U). The main product of the process created was the recycling treatment of 1.105 kg of steel, while the co-product was 1 kg of secondary steel. The environmental loads were allocated to both the recycling process and the secondary recycled steel obtained with a contribution of 50 % each. The process comprised also the end of life of the remaining scraps (the Ecoinvent process used was Scrap steel {CH}| treatment of, inert material landfill | APOS, U).

**Table S4.** Contributions to the Life Cycle Inventory (LCI) for the production of 1p of the activated carbon air. The activated carbon air filter was considered for a chemical hood with an air flow rate of 250 m<sup>3</sup>/h, and the velocity of filter crossing of the air was assumed to be 0.5 m/s. The lifetime of the filter was assumed to be 20000 h, while that of activated carbon was assumed to be 2400 h.

|        |             | Description                         | Amount   | Process data source           |
|--------|-------------|-------------------------------------|----------|-------------------------------|
| Input  | Materials   | Activated carbon                    | 54.40 kg | Ecoinvent v. 3.9 <sup>1</sup> |
|        |             | Steel                               | 12.68 kg | Ecoinvent v. 3.9 <sup>2</sup> |
|        | Processing  | Forming steel                       | 12.68 kg | Ecoinvent v. 3.9 <sup>3</sup> |
|        | Transport   | Transport of raw materials          | 6.71 tkm | Ecoinvent v. 3.9 <sup>4</sup> |
| Output | End of life | Recycling                           | 12.68 kg | Ecoinvent v. 3.9 <sup>5</sup> |
|        |             | Treatment of spent activated carbon | 54.40 kg | Ecoinvent v. 3.9 <sup>6</sup> |

<sup>1</sup>A single load of activated carbon weights 6.528 kg. The reported amount accounts also for the activated carbon needed during the whole filter lifetime. The Ecoinvent process used was: Activated carbon, granular {GLO}| market for activated carbon, granular | APOS, U.

<sup>2</sup>Weight of the filter container. The Ecoinvent process used was: Reinforcing steel {GLO}| market for | APOS, U.

<sup>3</sup>The Ecoinvent process used was: Sheet rolling, steel {GLO}| market for | APOS, U.

<sup>4</sup>The Ecoinvent process used was: Transport, freight, lorry 16-32 metric ton, EURO6 {RoW}| transport, freight, lorry 16-32 metric ton, EURO6 | APOS, U. An average distance of 100 km was considered.



<sup>5</sup>The recycling process for steel was modified by the authors. Particularly a new multi-output process was created with the input of 1 kg of steel (the Ecoinvent process used was Steel, low-alloyed {RER}| steel production, electric, low-alloyed | APOS, U). The main product of the process created was the recycling treatment of 1.105 kg of steel, while the co-product was 1 kg of secondary steel. The environmental loads were allocated to both the recycling process and the secondary recycled steel obtained with a contribution of 50 % each. The process comprised also the end of life of the remaining scraps (the Ecoinvent process used was Scrap steel {CH}| treatment of, inert material landfill | APOS, U).

<sup>6</sup>The Ecoinvent process used was: Spent activated carbon, granular {GLO}| market for spent activated carbon, granular | APOS, U.

**Table S5.** Contributions to the Life Cycle Inventory (LCI) for the production of 1p of glass flask. The lifetime of the glass flask was assumed to be 28800 h (considering 15 years of use for 48 week per year, 5 days per week and 8 hours per day).

| Description |             |                            | Amount    | Process Data Source          |
|-------------|-------------|----------------------------|-----------|------------------------------|
| Input       | Material    | Borosilicate glass         | 63.49 g   | Ecoinvent v 3.8 <sup>1</sup> |
|             | Transport   | Transport of raw materials | 6.35 kgkm | Ecoinvent v 3.8 <sup>2</sup> |
| Output      | End of life | Landfill                   | 63.49 g   | Ecoinvent v 3.8 <sup>3</sup> |

<sup>1</sup>The Ecoinvent process used was: Glass tube, borosilicate {RoW}| production | APOS, U.

<sup>2</sup>The Ecoinvent process used was: Transport, freight, lorry 3.5-7.5 metric ton, EURO6 {RER}| transport, freight, lorry 3.5-7.5 metric ton, EURO6 | APOS, U. An average distance of 100km was considered.

<sup>3</sup>The Ecoinvent process used was: Inert waste, for final disposal {RoW}| treatment of inert waste, inert material landfill APOS, U.

**Table S6.** Contributions to the Life Cycle Inventory (LCI) for the production of 1p of glass silicon oil container. The lifetime of the container was assumed to be 28800 h (considering 15 years of use for 48 week per year, 5 days per week and 8 hours per day).

| Description |             |                            | Amount      | Process Data Source          |
|-------------|-------------|----------------------------|-------------|------------------------------|
| Input       | Material    | Borosilicate glass         | 126.76 g    | Ecoinvent v 3.8 <sup>1</sup> |
|             | Transport   | Transport of raw materials | 12.676 kgkm | Ecoinvent v 3.8 <sup>2</sup> |
| Output      | End of life | Landfill                   | 126.76g     | Ecoinvent v 3.8 <sup>3</sup> |

<sup>1</sup>The Ecoinvent process used was: Glass tube, borosilicate {RoW}| production | APOS, U.

<sup>2</sup>The Ecoinvent process used was: Transport, freight, lorry 3.5-7.5 metric ton, EURO6 {RER}| transport, freight, lorry 3.5-7.5 metric ton, EURO6 | APOS, U. An average distance of 100km was considered.

<sup>3</sup>The Ecoinvent process used was: Inert waste, for final disposal {RoW}| treatment of inert waste, inert material landfill APOS, U.

**Table S7.** Contributions to the Life Cycle Inventory (LCI) for the production of 1p of paper filter. The lifetime of the filter was assumed to be three years, 26280 hours.

| Description |             |                            | Amount                     | Process Data Source          |
|-------------|-------------|----------------------------|----------------------------|------------------------------|
| Input       | Material    | Cellulose                  | 0.492 g                    | Ecoinvent v 3.8 <sup>1</sup> |
|             | Transport   | Transport of raw materials | 4.92*10 <sup>-2</sup> kgkm | Ecoinvent v 3.8 <sup>2</sup> |
| Output      | End of life | Landfill                   | 0.492 g                    | Ecoinvent v 3.8 <sup>3</sup> |

<sup>1</sup>The Ecoinvent process used was: Cellulose fibre {RoW}| cellulose fibre production | APOS, U.

<sup>2</sup>The Ecoinvent process used was: Transport, freight, lorry 3.5-7.5 metric ton, EURO6 {RER}| transport, freight, lorry 3.5-7.5 metric ton, EURO6 | APOS, U. An average distance of 100 km was considered.

<sup>3</sup>The Ecoinvent process used was: Inert waste, for final disposal {RoW}| treatment of inert waste, inert material landfill | APOS, U.

**Table S8.** Contributions to the Life Cycle Inventory (LCI) for the production of 1p of glass funnel. The lifetime of the container was assumed to be 28800 h (considering 15 years of use for 48 week per year, 5 days per week and 8 hours per day).

| Description |             |                            | Amount     | Process Data Source          |
|-------------|-------------|----------------------------|------------|------------------------------|
| Input       | Material    | Borosilicate glass         | 12.87 g    | Ecoinvent v 3.8 <sup>1</sup> |
|             | Transport   | Transport of raw materials | 1.287 kgkm | Ecoinvent v 3.8 <sup>2</sup> |
| Output      | End of life | Landfill                   | 12.87 g    | Ecoinvent v 3.8 <sup>3</sup> |

<sup>1</sup>The Ecoinvent process used was: Glass tube, borosilicate {RoW}| production | APOS, U.

<sup>2</sup>The Ecoinvent process used was: Transport, freight, lorry 3.5-7.5 metric ton, EURO6 {RER}| transport, freight, lorry 3.5-7.5 metric ton, EURO6 | APOS, U. An average distance of 100km was considered.

<sup>3</sup>The Ecoinvent process used was: Inert waste, for final disposal {RoW}| treatment of inert waste, inert material landfill | APOS, U.

**Table S9.** Contributions to the Life Cycle Inventory (LCI) for the production of 1p of separatory funnel. The lifetime of the separatory funnel was assumed to be 28800 h (considering 15 years of use for 48 week per year, 5 days per week and 8 hours per day). The plastic portion of the separatory funnel, its stopcock, was also considered, being made of tetrafluoroethylene.

| Description |             |                            | Amount    | Process Data Source          |
|-------------|-------------|----------------------------|-----------|------------------------------|
| Input       | Material    | Borosilicate glass         | 65.79 g   | Ecoinvent v 3.8 <sup>1</sup> |
|             |             | TFE                        | 10.93 g   | Ecoinvent v 3.8 <sup>2</sup> |
|             | Transport   | Transport of raw materials | 7.67 kgkm | Ecoinvent v 3.8 <sup>3</sup> |
| Output      | End of life | Landfill                   | 65.79 g   | Ecoinvent v 3.8 <sup>4</sup> |
|             |             | Recycling of plastic       | 10.93 g   | Ecoinvent v 3.8 <sup>5</sup> |

<sup>1</sup>The Ecoinvent process used was: Glass tube, borosilicate {RoW}| production | APOS, U.

<sup>2</sup>The Ecoinvent process used was: Tetrafluoroethylene {RER}| production | APOS, U.

<sup>3</sup>The Ecoinvent process used was: Transport, freight, lorry 3.5-7.5 metric ton, EURO6 {RER}| transport, freight, lorry 3.5-7.5 metric ton, EURO6 | APOS, U. An average distance of 100km was considered.

<sup>4</sup>The Ecoinvent process used was: Inert waste, for final disposal {RoW}| treatment of inert waste, inert material landfill APOS, U.

<sup>5</sup>The recycling process for plastic was modified by the authors. Particularly a new process was created with the inputs taken from the Ecoinvent database process of the Polypropylene recycling. However, the environmental loads were allocated to both the recycling process and the secondary recycled plastic with a contribution of 50 % each.

**Table S10.** Contributions to the Life Cycle Inventory (LCI) for the production of 1p of glass round bottom flask. The lifetime of the round bottom flask was assumed to be 28800 h (considering 15 years of use for 48 week per year, 5 days per week and 8 hours per day).

| Description |             |                            | Amount     | Process Data Source          |
|-------------|-------------|----------------------------|------------|------------------------------|
| Input       | Material    | Borosilicate glass         | 71.05 g    | Ecoinvent v 3.8 <sup>1</sup> |
|             | Transport   | Transport of raw materials | 7.105 kgkm | Ecoinvent v 3.8 <sup>2</sup> |
| Output      | End of life | Landfill                   | 71.05 g    | Ecoinvent v 3.8 <sup>3</sup> |

<sup>1</sup>The Ecoinvent process used was: Glass tube, borosilicate {RoW}| production | APOS, U.

<sup>2</sup>The Ecoinvent process used was: Transport, freight, lorry 3.5-7.5 metric ton, EURO6 {RER}| transport, freight, lorry 3.5-7.5 metric ton, EURO6 | APOS, U. An average distance of 100km was considered.

<sup>3</sup>The Ecoinvent process used was: Inert waste, for final disposal {RoW}| treatment of inert waste, inert material landfill APOS, U.

**Table S11.** Contributions to the Life Cycle Inventory (LCI) for the production of 1p glass fitting for the rotavapor. The lifetime of the fitting for the rotavapor was assumed to be 28800 h (considering 15 years of use for 48 week per year, 5 days per week and 8 hours per day).

| Description |             |                            | Amount     | Process Data Source          |
|-------------|-------------|----------------------------|------------|------------------------------|
| Input       | Material    | Borosilicate glass         | 29.74 g    | Ecoinvent v 3.8 <sup>1</sup> |
|             | Transport   | Transport of raw materials | 2.974 kgkm | Ecoinvent v 3.8 <sup>2</sup> |
| Output      | End of life | Landfill                   | 29.74 g    | Ecoinvent v 3.8 <sup>3</sup> |

<sup>1</sup>The Ecoinvent process used was: Glass tube, borosilicate {RoW}| production | APOS, U.

<sup>2</sup>The Ecoinvent process used was: Transport, freight, lorry 3.5-7.5 metric ton, EURO6 {RER}| transport, freight, lorry 3.5-7.5 metric ton, EURO6 | APOS, U. An average distance of 100km was considered.

<sup>3</sup>The Ecoinvent process used was: Inert waste, for final disposal {RoW}| treatment of inert waste, inert material landfill APOS, U.

**Table S12.** Contributions to the Life Cycle Inventory (LCI) for the production of 1p glass fitting for the reflux condenser. The lifetime of the fitting for reflux condenser was assumed to be 28800 h (considering 15 years of use for 48 week per year, 5 days per week and 8 hours per day).

| Description |             |                            | Amount    | Process Data Source          |
|-------------|-------------|----------------------------|-----------|------------------------------|
| Input       | Material    | Borosilicate glass         | 31.7 g    | Ecoinvent v 3.8 <sup>1</sup> |
|             | Transport   | Transport of raw materials | 3.17 kgkm | Ecoinvent v 3.8 <sup>2</sup> |
| Output      | End of life | Landfill                   | 31.7 g    | Ecoinvent v 3.8 <sup>3</sup> |

<sup>1</sup>The Ecoinvent process used was: Glass tube, borosilicate {RoW}| production | APOS, U.

<sup>2</sup>The Ecoinvent process used was: Transport, freight, lorry 3.5-7.5 metric ton, EURO6 {RER}| transport, freight, lorry 3.5-7.5 metric ton, EURO6 | APOS, U. An average distance of 100km was considered.

<sup>3</sup>The Ecoinvent process used was: Inert waste, for final disposal {RoW}| treatment of inert waste, inert material landfill APOS, U.

**Table S13.** Contributions to the Life Cycle Inventory (LCI) for the production of 1p glass reflux condenser. The lifetime of the reflux condenser was assumed to be 28800 h (considering 15 years of use for 48 week per year, 5 days per week and 8 hours per day).

| Description |             |                            | Amount      | Process Data Source          |
|-------------|-------------|----------------------------|-------------|------------------------------|
| Input       | Material    | Borosilicate glass         | 222.73 g    | Ecoinvent v 3.8 <sup>1</sup> |
|             | Transport   | Transport of raw materials | 22.273 kgkm | Ecoinvent v 3.8 <sup>2</sup> |
| Output      | End of life | Landfill                   | 222.73 g    | Ecoinvent v 3.8 <sup>3</sup> |

<sup>1</sup>The Ecoinvent process used was: Glass tube, borosilicate {RoW}| production | APOS, U.

<sup>2</sup>The Ecoinvent process used was: Transport, freight, lorry 3.5-7.5 metric ton, EURO6 {RER}| transport, freight, lorry 3.5-7.5 metric ton, EURO6 | APOS, U. An average distance of 100km was considered.

<sup>3</sup>The Ecoinvent process used was: Inert waste, for final disposal {RoW}| treatment of inert waste, inert material landfill APOS, U.

**Table S14.** Contributions to the Life Cycle Inventory (LCI) for the production of 1p of rubber tube. The lifetime of the rubber tube was assumed to be 15 years, 131400 hours.

| Description |             |                            | Amount     | Process Data Source          |
|-------------|-------------|----------------------------|------------|------------------------------|
| Input       | Material    | Synthetic rubber           | 83.19 g    | Ecoinvent v 3.8 <sup>1</sup> |
|             | Transport   | Transport of raw materials | 8.319 kgkm | Ecoinvent v 3.8 <sup>2</sup> |
| Output      | End of life | Recycling od plastics      | 83.19 g    | Ecoinvent v 3.8 <sup>3</sup> |

<sup>1</sup>The Ecoinvent process used was: Synthetic rubber {RER}| production | APOS, U.

<sup>2</sup>The Ecoinvent process used was: Transport, freight, lorry 3.5-7.5 metric ton, EURO6 {RER}| transport, freight, lorry 3.5-7.5 metric ton, EURO6 | APOS, U. An average distance of 100km was considered.

<sup>3</sup>The recycling process for plastic was modified by the authors. Particularly a new process was created with the inputs taken from the Ecoinvent database process of the Polypropylene recycling. However, the environmental loads were allocated to both the recycling process and the secondary recycled plastic with a contribution of 50 % each.

**Table S15.** Contributions to the Life Cycle Inventory (LCI) for the production of 1p of a round bottom flask used during the workup phase. The lifetime of the round bottom flasks was assumed to be 28800 h (considering 15 years of use for 48 week per year, 5 days per week and 8 hours per day).

| Description |             |                            | Amount    | Process Data Source          |
|-------------|-------------|----------------------------|-----------|------------------------------|
| Input       | Material    | Borosilicate glass         | 19.16 g   | Ecoinvent v 3.8 <sup>1</sup> |
|             | Transport   | Transport of raw materials | 1.92 kgkm | Ecoinvent v 3.8 <sup>2</sup> |
| Output      | End of life | Landfill                   | 19.16 g   | Ecoinvent v 3.8 <sup>3</sup> |

<sup>1</sup>The Ecoinvent process used was: Glass tube, borosilicate {RoW}| production | APOS, U.

<sup>2</sup>The Ecoinvent process used was: Transport, freight, lorry 3.5-7.5 metric ton, EURO6 {RER}| transport, freight, lorry 3.5-7.5 metric ton, EURO6 | APOS, U. An average distance of 100km was considered.

<sup>3</sup>The Ecoinvent process used was: Inert waste, for final disposal {RoW}| treatment of inert waste, inert material landfill APOS, U.

**Table S16.** Contributions to the Life Cycle Inventory (LCI) for the production of 1p of a round bottom flask. The lifetime of the round bottom flasks was assumed to be 28800 h (considering 15 years of use for 48 week per year, 5 days per week and 8 hours per day).

| Description |             |                            | Amount     | Process Data Source          |
|-------------|-------------|----------------------------|------------|------------------------------|
| Input       | Material    | Borosilicate glass         | 43.61 g    | Ecoinvent v 3.8 <sup>1</sup> |
|             | Transport   | Transport of raw materials | 4.361 kgkm | Ecoinvent v 3.8 <sup>2</sup> |
| Output      | End of life | Landfill                   | 43.61 g    | Ecoinvent v 3.8 <sup>3</sup> |

<sup>1</sup>The Ecoinvent process used was: Glass tube, borosilicate {RoW}| production | APOS, U.

<sup>2</sup>The Ecoinvent process used was: Transport, freight, lorry 3.5-7.5 metric ton, EURO6 {RER}| transport, freight, lorry 3.5-7.5 metric ton, EURO6 | APOS, U. An average distance of 100km was considered.

<sup>3</sup>The Ecoinvent process used was: Inert waste, for final disposal {RoW}| treatment of inert waste, inert material landfill APOS, U.

**Table S17.** Contributions to the Life Cycle Inventory (LCI) for the production of 1p of a distillation column. The lifetime of the distillation column was assumed to be 28800 h (considering 15 years of use for 48 week per year, 5 days per week and 8 hours per day).

| Description |          |                    | Amount | Process Data Source          |
|-------------|----------|--------------------|--------|------------------------------|
| Input       | Material | Borosilicate glass | 350 g  | Ecoinvent v 3.8 <sup>1</sup> |

|        |             |                            |         |                              |
|--------|-------------|----------------------------|---------|------------------------------|
|        | Transport   | Transport of raw materials | 35 kgkm | Ecoinvent v 3.8 <sup>2</sup> |
| Output | End of life | Landfill                   | 350 g   | Ecoinvent v 3.8 <sup>3</sup> |

<sup>1</sup>The Ecoinvent process used was: Glass tube, borosilicate {RoW}| production | APOS, U.

<sup>2</sup>The Ecoinvent process used was: Transport, freight, lorry 3.5-7.5 metric ton, EURO6 {RER}| transport, freight, lorry 3.5-7.5 metric ton, EURO6 | APOS, U. An average distance of 100km was considered.

<sup>3</sup>The Ecoinvent process used was: Inert waste, for final disposal {RoW}| treatment of inert waste, inert material landfill APOS, U.

**Table S18.** Contributions to the Life Cycle Inventory (LCI) for the production of 1p of the magnetic stirrer, with a weight of 2.8 kg and a power of 500W. Its lifetime was assumed to be 50000 h.

| Description |             |                            | Amount      | Process data source            |
|-------------|-------------|----------------------------|-------------|--------------------------------|
| Input       | Material    | Reinforcing Steel          | 1123.07 g   | Ecoinvent v. 3.8 <sup>1</sup>  |
|             |             | HDPE                       | 980 g       | Ecoinvent v. 3.8 <sup>2</sup>  |
|             |             | Steel                      | 420 g       | Ecoinvent v. 3.8 <sup>3</sup>  |
|             |             | Copper                     | 280 g       | Ecoinvent v. 3.8 <sup>4</sup>  |
|             | Process     | Hot Rolling                | 1123.07 g   | Ecoinvent v. 3.8 <sup>5</sup>  |
|             |             | Blow Moulding              | 980 g       | Ecoinvent v. 3.8 <sup>6</sup>  |
|             |             | Wire Drawing (steel)       | 420 g       | Ecoinvent v. 3.8 <sup>7</sup>  |
|             |             | Wire drawing (copper)      | 280 g       | Ecoinvent v. 3.8 <sup>8</sup>  |
|             | Transport   | Transport of raw materials | 280.31 kgkm | Ecoinvent v. 3.8 <sup>9</sup>  |
| Output      | End of life | Waste treatment            | 2.8 kg      | Ecoinvent v. 3.8 <sup>10</sup> |

<sup>1</sup>The Ecoinvent process used was: Reinforcing steel {Europe without Austria}| reinforcing steel production | APOS, U.

<sup>2</sup>The Ecoinvent process used was: Polyethylene, high density, granulate {RER}| production | APOS, U.

<sup>3</sup>The Ecoinvent process used was: Steel, chromium steel 18/8 {RER}| steel production, electric, chromium steel 18/8 | APOS, U.

<sup>4</sup>The Ecoinvent process used was: Copper {RER}| production, primary | APOS, U.

<sup>5</sup>The Ecoinvent process used was: Hot rolling, steel {RoW}| processing | APOS, U.

<sup>6</sup>The Ecoinvent process used was: Blow moulding {RER}| blow moulding | APOS, U.

<sup>7</sup>The Ecoinvent process used was: Wire drawing, steel {RER}| processing | APOS, U.

<sup>8</sup>The Ecoinvent process used was: Wire drawing, copper {RoW}| processing | APOS, U.

<sup>9</sup>The Ecoinvent process used was: Transport, freight, lorry 16-32 metric ton, EURO6 {RER}| transport, freight, lorry 16-32 metric ton, EURO6 | APOS, U. An average distance of 100 km was chosen.

<sup>10</sup>The Ecoinvent process used was: Waste electric and electronic equipment {GLO}| treatment of, shredding | APOS, U.

**Table S19.** Contributions to the Life Cycle Inventory (LCI) for the synthesis of 12.21 g of 4-hydroxybenzaldehyde, according to the synthesis proposed by the patent CN102992982A, based on the Vilsmeier reaction.

| Description          |                                  |                             | Amount                                                                               | Process Data Source          |
|----------------------|----------------------------------|-----------------------------|--------------------------------------------------------------------------------------|------------------------------|
| Input                | Materials                        | Toluene                     | 87.14 g                                                                              | Ecoinvent v 3.8 <sup>1</sup> |
|                      |                                  | POCl <sub>3</sub>           | 19.762 g                                                                             | Ecoinvent v 3.8 <sup>2</sup> |
|                      |                                  | DMF                         | 9.4 g                                                                                | Ecoinvent v 3.8 <sup>3</sup> |
|                      |                                  | Phenol                      | 10.15 g                                                                              | Ecoinvent v 3.8 <sup>4</sup> |
|                      |                                  | Water                       | 200g                                                                                 | Ecoinvent v 3.8 <sup>5</sup> |
|                      |                                  | Water                       | 280 g                                                                                | Ecoinvent v 3.8 <sup>6</sup> |
| Equipment/<br>plants | Magnetic stirrer/heater          | 5.83*10 <sup>-5</sup> p     | Modelled from<br>Ecoinvent v 3.8 database<br>sub process as detailed in<br>Table S18 |                              |
|                      | Round bottom flask               | 1.04*10 <sup>-4</sup> p     | Modelled from<br>Ecoinvent v 3.8 database<br>sub process as detailed in<br>Table S16 |                              |
|                      | Separatory funnel                | 8.68*10 <sup>-6</sup> p     | Modelled from<br>Ecoinvent v 3.8 database<br>sub process as detailed in<br>Table S9  |                              |
|                      | Activated carbon air<br>filter   | 1.5*10 <sup>-4</sup> p      | Modelled from<br>Ecoinvent v 3.8 database<br>sub process as detailed in<br>Table S4  |                              |
|                      | Aspiration system                | 3.76*10 <sup>-5</sup> p     | Modelled from<br>Ecoinvent v 3.8 database<br>sub process as detailed in<br>Table S3  |                              |
| Trasnport            | Transport for large<br>equipment | 6.26*10 <sup>-3</sup> kgkm  | Ecoinvent v 3.8 <sup>7</sup>                                                         |                              |
|                      | Transport for raw<br>materials   | 60.6321 kgkm                | Ecoinvent v 3.8 <sup>8</sup>                                                         |                              |
|                      | Transport for small<br>equipment | 8.22 *10 <sup>-2</sup> kgkm | Ecoinvent v 3.8 <sup>9</sup>                                                         |                              |
| Energy               | Electric energy                  | 62.20 J                     | Ecoinvent v 3.8 <sup>10</sup>                                                        |                              |
|                      |                                  | 27 Wh                       | Ecoinvent v 3.8 <sup>11</sup>                                                        |                              |
|                      |                                  | 250 Wh                      | Ecoinvent v 3.8 <sup>12</sup>                                                        |                              |
|                      |                                  | 835 Wh                      | Ecoinvent v 3.8 <sup>13</sup>                                                        |                              |
|                      |                                  | 41 kJ                       | Ecoinvent v 3.8 <sup>14</sup>                                                        |                              |
|                      |                                  | 35.94 kJ                    | Ecoinvent v 3.8 <sup>15</sup>                                                        |                              |
|                      |                                  | 2.51*10 <sup>-1</sup> kWh   | Ecoinvent v 3.8 <sup>16</sup>                                                        |                              |

|        |              |                       |                        |                                                        |
|--------|--------------|-----------------------|------------------------|--------------------------------------------------------|
| Output | Air emission | Toluene               | $1.41 \cdot 10^{-3}$ g | SimaPro airborne emission substance list <sup>17</sup> |
|        |              | DMF                   | $1.46 \cdot 10^{-6}$ g | SimaPro airborne emission substance list <sup>18</sup> |
|        |              | Phenol                | $1.68 \cdot 10^{-7}$ g | SimaPro airborne emission substance list <sup>19</sup> |
|        |              | Water                 | $4.61 \cdot 10^{-5}$ g | SimaPro airborne emission substance list <sup>20</sup> |
|        |              | Water                 | $6.46 \cdot 10^{-5}$ g | SimaPro airborne emission substance list <sup>21</sup> |
|        | End of life  | Waste water           | 200 g                  | Ecoinvent v 3.8 <sup>22</sup>                          |
|        |              | Waste water           | 303.34 cm <sup>3</sup> | Ecoinvent v 3.8 <sup>23</sup>                          |
|        |              | Spent solvent mixture | 87 g                   | Ecoinvent v 3.8 <sup>24</sup>                          |

<sup>17</sup>The Ecoinvent process used was: Toluene, liquid {RER} | production | APOS, U.

<sup>22</sup>The Ecoinvent process used was: Phosphorus oxychloride {RER} | phosphorus oxychloride production, from phosphorus trichloride | APOS, U.

<sup>3</sup>The Ecoinvent process used was: N,N-dimethylformamide {RER} | production | APOS, U.

<sup>4</sup>The Ecoinvent process use was: Phenol {RER} | phenol production, from cumene | APOS, U.

<sup>5</sup>The Ecoinvent process used was: Water, deionised {Europe without Switzerland} | water production, deionised | APOS, U.

<sup>6</sup>The Ecoinvent process used was: Water, deionised {Europe without Switzerland} | water production, deionised | APOS, U.

<sup>7</sup>Transport of large equipment (aspiration system and activated air carbon filter). The Ecoinvent process used was: Transport, freight, lorry 16-32 metric ton, EURO6 {RER} | transport, freight, lorry 16-32 metric ton, EURO6 | APOS, U. An average distance of 100km was considered.

<sup>8</sup>Transport for reagents. The Ecoinvent process used was: Transport, freight, lorry 3.5-7.5 metric ton, EURO6 {RER} | transport, freight, lorry 3.5-7.5 metric ton, EURO6 | APOS, U. An average distance of 100km was considered.

<sup>9</sup>Transport for small laboratory equipment. The Ecoinvent process used was: Transport, freight, lorry 3.5-7.5 metric ton, EURO6 {RER} | transport, freight, lorry 3.5-7.5 metric ton, EURO6 | APOS, U. An average distance of 100 km was considered.

<sup>10</sup>Electric energy necessary for the first reaction step to mix and cool down to 10°C the reaction mixture containing Toluene, DMF and POCl<sub>3</sub>. It is calculated using the expression  $m \cdot Cp \cdot DT$ , considering the specific heat in J/kg°C for each of the three substances.

<sup>11</sup>Electric energy necessary to maintain the agitation and cooling down of the reaction mixture, in the first reaction step, for 45 minutes. It is calculated using the Fourier Equation. The Ecoinvent process used was: Electricity, low voltage {IT} | electricity voltage transformation from medium to low voltage | APOS, U.

<sup>12</sup>Electric energy necessary for the mixing and heating of the reaction mixture in the second step of the reaction. It is calculated as power\*time, considering a power of 200W to heat the reaction to a temperature of 120°C. The Ecoinvent process used was: Electricity, low voltage {IT} | electricity voltage transformation from medium to low voltage | APOS, U.

<sup>13</sup>Energy necessary to mix the reaction for 100 minutes after adding 200 ml of water. It is calculated as power\*time. The Ecoinvent process used was: Electricity, low voltage {IT} | electricity voltage transformation from medium to low voltage | APOS, U.

<sup>14</sup>Electric energy necessary to heat up to 60°C 280 ml of water. It is calculated as  $m \cdot Cp \cdot DT$ , considering 4.186 J/g°C as water specific heat. The Ecoinvent process used was: Electricity, low voltage {IT} | electricity voltage transformation from medium to low voltage | APOS, U.



<sup>15</sup>Electric energy necessary to eliminate the remaining solvent (Toluene) using the rotavapor. It is calculated as  $H_{vap}Toluene \cdot molToluene$ , considering  $H_{vapt}Toluene$  as its latent heat of vaporization (38.06 kJ/mol) and  $molToluene$  as the moles of the solvent. The Ecoinvent process used was: Electricity, low voltage {IT} | electricity voltage transformation from medium to low voltage | APOS, U.

<sup>16</sup>Electric energy necessary to the use of the aspiration system for the whole synthesis time, i.e. 3 h. The power was calculated by considering the air flow rate of 250 m<sup>3</sup>/h, a total load loss of 110.8076 kg/m<sup>2</sup>, and an efficiency of 90%: Electricity, low voltage {IT} | electricity voltage transformation from medium to low voltage | APOS, U.

<sup>17</sup>Amount of Toluene released into the atmosphere, as calculated by the formula reported in equation 1 of the main manuscript.

<sup>18</sup> Amount of DMF released into the atmosphere, as calculated by the formula reported in equation 4 of the main manuscript.

<sup>19</sup> Amount of Phenol released into the atmosphere, as calculated by the formula reported in equation 4 of the main manuscript.

<sup>20</sup>Amount of water released into the atmosphere, as calculated by the formula reported in equation 4 of the main manuscript.

<sup>21</sup>Amount of water released into the atmosphere, as calculated by the formula reported in equation 4 of the main manuscript.

<sup>22</sup>End of life of water separated from the organic phase using a separatory funnel. The Ecoinvent process used was: Wastewater, average {Europe without Switzerland} | treatment of wastewater, average, capacity 1E9l/year | APOS, U.

<sup>23</sup>End of life of water separated with a separatory funnel from the organic phase in the last step of the reaction. The Ecoinvent process used was: Wastewater, average {Europe without Switzerland} | treatment of wastewater, average, capacity 1E9l/year | APOS, U.

<sup>24</sup>End of life of the Toluene solvent used to carry the reaction. The Ecoinvent process used was: Spent solvent mixture {Europe without Switzerland} | treatment of spent solvent mixture, hazardous waste incineration, with energy recovery | APOS, U

**Table S20.** Contribution to the Life Cycle Inventory (LCI) for the synthesis of  $8.72 \cdot 10^{-2}$  g of Vanillin, according to the synthesis proposed by Taber et al [1].

| Description |                                 | Amount                 | Process Data Source                                                                  |
|-------------|---------------------------------|------------------------|--------------------------------------------------------------------------------------|
| Input       | Materials                       |                        | Modelled from<br>Ecoinvent v 3.8 database<br>sub process as detailed in<br>Table S19 |
|             | 4-hydroxy<br>benzaldehyde       | 0.1 g                  |                                                                                      |
|             | Br <sub>2</sub>                 | 2.50 g                 | Ecoinvent v 3.8 <sup>1</sup>                                                         |
|             | CH <sub>3</sub> OH              | 0.70 g                 | Ecoinvent v 3.8 <sup>2</sup>                                                         |
|             | CH <sub>3</sub> NaO             | 0.33 g                 | Ecoinvent v 3.8 <sup>3</sup>                                                         |
|             | CH <sub>3</sub> OH              | 0.99 g                 | Ecoinvent v 3.8 <sup>4</sup>                                                         |
|             | Ethyl acetate                   | 0.99 g                 | Ecoinvent v 3.8 <sup>5</sup>                                                         |
|             | CuBr                            | 0.08 g                 | Ecoinvent v 3.8 <sup>6</sup>                                                         |
|             | HCl                             | $1.38 \cdot 10^{-2}$ g | Ecoinvent v 3.8 <sup>7</sup>                                                         |
|             | Ethyl acetate                   | 13.51 g                | Ecoinvent v 3.8 <sup>8</sup>                                                         |
|             | Na <sub>2</sub> SO <sub>4</sub> | 5 g                    | Ecoinvent v 3.8 <sup>9</sup>                                                         |
|             | Diethyl ether                   | 149.1 g                | Ecoinvent v 3.8 <sup>10</sup>                                                        |
|             | H <sub>2</sub> O                | 25 g                   | Ecoinvent v 3.8 <sup>11</sup>                                                        |
|             | Silicon oil                     | 0.26 g                 | Ecoinvent v 3.8 <sup>12</sup>                                                        |
|             | Activated silica                | 5.5 g                  | Ecoinvent v 3.8 <sup>13</sup>                                                        |

|                      |                                  |                             |                                                                                      |                                                              |
|----------------------|----------------------------------|-----------------------------|--------------------------------------------------------------------------------------|--------------------------------------------------------------|
| Equipment/<br>plants | Magnetic stirrer/heater          | 3*10 <sup>-5</sup> p        | Modelled from<br>Ecoinvent v 3.8 database<br>sub process as detailed in<br>Table S18 |                                                              |
|                      | Round bottom flask               | 1.77*10 <sup>-5</sup> p     | Modelled from<br>Ecoinvent v 3.8 database<br>sub process as detailed in<br>Table S16 |                                                              |
|                      | Separatory funnel                | 1.77*10 <sup>-5</sup> p     | Modelled from<br>Ecoinvent v 3.8 database<br>sub process as detailed in<br>Table S9  |                                                              |
|                      | Activated carbon air<br>filter   | 1.5*10 <sup>-4</sup> p      | Modelled from<br>Ecoinvent v 3.8 database<br>sub process as detailed in<br>Table S4  |                                                              |
|                      | Aspiration system                | 3.76*10 <sup>-5</sup> p     | Modelled from<br>Ecoinvent v 3.8 database<br>sub process as detailed in<br>Table S3  |                                                              |
| Trasnport            | Transport for large<br>equipment | 6.26*10 <sup>-3</sup> kgkm  | Ecoinvent v 3.8 <sup>14</sup>                                                        |                                                              |
|                      | Transport for raw<br>materials   | 20.32 kgkm                  | Ecoinvent v 3.8 <sup>15</sup>                                                        |                                                              |
|                      | Transport for small<br>equipment | 9.30 *10 <sup>-3</sup> kgkm | Ecoinvent v 3.8 <sup>16</sup>                                                        |                                                              |
| Energy               | Electric energy                  | 6.51 kJ                     | Ecoinvent v 3.8 <sup>17</sup>                                                        |                                                              |
|                      |                                  | 25.2 Wh                     | Ecoinvent v 3.8 <sup>18</sup>                                                        |                                                              |
|                      |                                  | 16.81 kJ                    | Ecoinvent v 3.8 <sup>19</sup>                                                        |                                                              |
|                      |                                  | 252 Wh                      | Ecoinvent v 3.8 <sup>20</sup>                                                        |                                                              |
|                      |                                  | 4.97 kJ                     | Ecoinvent v 3.8 <sup>21</sup>                                                        |                                                              |
|                      |                                  | 0.25 kJ                     | Ecoinvent v 3.8 <sup>22</sup>                                                        |                                                              |
|                      |                                  | 7.84 kJ                     | Ecoinvent v 3.8 <sup>23</sup>                                                        |                                                              |
| Output               | Air<br>emission                  | Br <sub>2</sub>             | 1.20*10 <sup>-5</sup> g                                                              | SimaPro airborne<br>emission substance<br>list <sup>24</sup> |
|                      |                                  | Ethyl acetate               | 5.21*10 <sup>-5</sup> g                                                              | SimaPro airborne<br>emission substance<br>list <sup>25</sup> |
|                      |                                  | HCl                         | 4.83*10 <sup>-5</sup> g                                                              | SimaPro airborne<br>emission substance<br>list <sup>26</sup> |
|                      |                                  | CH <sub>3</sub> OH          | 1.16*10 <sup>-3</sup> g                                                              | SimaPro airborne<br>emission substance<br>list <sup>27</sup> |

|             |                       |          |                               |
|-------------|-----------------------|----------|-------------------------------|
| End of life | Waste water           | 0.025 l  | Ecoinvent v 3.8 <sup>28</sup> |
|             | Spent solvent mixture | 166.65 g | Ecoinvent v 3.8 <sup>29</sup> |
|             | Spent solvent mixture | 5.18 g   | Ecoinvent v 3.8 <sup>30</sup> |
|             | Incineration          | 5.76 g   | Ecoinvent v 3.8 <sup>31</sup> |

<sup>1</sup>The Ecoinvent process used was: Bromine {RER}| production | APOS, U.

<sup>2</sup>The Ecoinvent process used was: Methanol {GLO}| production | APOS, U.

<sup>3</sup>The Ecoinvent process used was: Sodium methoxide {GLO}| production | APOS, U.

<sup>4</sup>The Ecoinvent process use was: Methanol {GLO}| production | APOS, U.

<sup>5</sup>The Ecoinvent process used was: Ethyl acetate {RER}| production | APOS, U.

<sup>6</sup>The Ecoinvent process used was: Copper oxide {RER}| production | APOS, U. Since CuBr is not present in the database, the Ecoinvent process for CuO was used as proxy.

<sup>7</sup>The Ecoinvent process used was: Hydrochloric acid, without water, in 30% solution state {RER}| hydrochloric acid production, from the reaction of hydrogen with chlorine | APOS, U.

<sup>8</sup>The Ecoinvent process used was: Ethyl acetate {RER}| production | APOS, U.

<sup>9</sup>The Ecoinvent process used was: Sodium sulphate, anhydrite {RER}| sodium sulphate production, from natural sources | APOS, U.

<sup>10</sup>The Ecoinvent process used was: Diethyl ether, without water, in 99.95% solution state {RER}| ethylene hydration | APOS, U.

<sup>11</sup>The Ecoinvent process used was: Water, deionised {Europe without Switzerland}| water production, deionised | APOS, U.

<sup>12</sup>The Ecoinvent process used was: Silicone product {RER}| production | APOS, U.

<sup>13</sup>The Ecoinvent process used was: Activated silica {GLO}| production | APOS, U.

<sup>14</sup>Transport of large equipment (aspiration system and activated air carbon filter). The Ecoinvent process used was: Transport, freight, lorry 16-32 metric ton, EURO6 {RER}| transport, freight, lorry 16-32 metric ton, EURO6 | APOS, U. An average distance of 100km was considered.

<sup>15</sup>Transport for reagents. The Ecoinvent process used was: Transport, freight, lorry 3.5-7.5 metric ton, EURO6 {RER}| transport, freight, lorry 3.5-7.5 metric ton, EURO6 | APOS, U. An average distance of 100km was considered.

<sup>16</sup>Transport for small laboratory equipment. The Ecoinvent process used was: Transport, freight, lorry 3.5-7.5 metric ton, EURO6 {RER}| transport, freight, lorry 3.5-7.5 metric ton, EURO6 | APOS, U. An average distance of 100 km was considered.

<sup>17</sup>Electric energy necessary for the heat up to 130°C of the reaction mixture in vial B containing methanol, ethyl acetate, sodium methoxide and copper. It is calculated using the expression  $m \cdot C_p \cdot DT$ , considering the specific heat in J/kg°C for each of the substances. The Ecoinvent process used was: Electricity, low voltage {IT}| electricity voltage transformation from medium to low voltage | APOS, U.

<sup>18</sup>Electric energy necessary to maintain the heating at 130°C of the reaction mixture in vial B for six hours. It is calculated using the Fourier Equation. The Ecoinvent process used was: Electricity, low voltage {IT}| electricity voltage transformation from medium to low voltage | APOS, U.

<sup>19</sup>Electric energy necessary for the heating of vial B during the adding of 4-hydroxy benzaldehyde and vial A to the reaction mixture up to 130°C. It is calculated using the expression  $m \cdot C_p \cdot DT$ , considering the specific heat in J/kg°C for each of the substances. The Ecoinvent process used was: Electricity, low voltage {IT}| electricity voltage transformation from medium to low voltage | APOS, U.

<sup>20</sup>Electric energy necessary to maintain the heating at 130°C of the reaction mixture for one hour.. It is calculated using the Fourier Equation. The Ecoinvent process used was: Electricity, low voltage {IT}| electricity voltage transformation from medium to low voltage | APOS, U.

<sup>21</sup>Electric energy necessary to eliminate the remaining solvent (ethyl acetate) using the rotavapor. It is calculated as  $H_{vap} \text{EthylAcetate} \cdot \text{MethylAcetate}$ , considering  $H_{vap} \text{EthylAcetate}$  as its latent heat of vaporization (365.7 J/g) and MethylAcetate as the mass of the used solvent. The Ecoinvent process used was: Electricity, low voltage {IT}| electricity voltage transformation from medium to low voltage | APOS, U.

<sup>22</sup>Electric energy necessary to the use of the aspiration system for the whole synthesis time, i.e. 3 h. The power was calculated by considering the air flow rate of 250 m<sup>3</sup>/h, a total load loss of 110.8076 kg/m<sup>2</sup>, and an efficiency of 90%: Electricity, low voltage {IT}| electricity voltage transformation from medium to low voltage | APOS, U.

<sup>23</sup>Electric energy necessary to heat up to its boiling point the water used for the crystallization step. It is calculated as  $m \cdot C_p \cdot DT$ , considering 4.186 J/g°C as water specific heat. The Ecoinvent process used was: Electricity, low voltage {IT} | electricity voltage transformation from medium to low voltage | APOS, U.

<sup>24</sup>Amount of Bromine released into the atmosphere, as calculated by the formula reported in equation 4 of the main manuscript.

<sup>25</sup>Amount of Ethyl Acetate released into the atmosphere, as calculated by the formula reported in equation 4 of the main manuscript.

<sup>26</sup>Amount of HCl released into the atmosphere, as calculated by the formula reported in equation 4 of the main manuscript.

<sup>27</sup>Amount of Methanol released into the atmosphere, as calculated by the formula reported in equation 4 of the main manuscript.

<sup>28</sup>End of life of water used during the crystallization phase. The Ecoinvent process used was: Wastewater, average {Europe without Switzerland} | treatment of wastewater, average, capacity 1E9l/year | APOS, U.

<sup>29</sup>End of life of the solvents used to carry the reaction. The Ecoinvent process used was: Spent solvent mixture {Europe without Switzerland} | treatment of spent solvent mixture, hazardous waste incineration, with energy recovery | APOS, U.

<sup>30</sup>End of life of HCl with the inorganic solid waste. The Ecoinvent process used was: Spent solvent mixture {Europe without Switzerland} | treatment of spent solvent mixture, hazardous waste incineration, with energy recovery | APOS, U.

<sup>31</sup>End of life of the waste of the silica gel from the chromatography phase and the silicon oil. The Ecoinvent process used was: Hazardous waste, for incineration {RoW} | treatment of hazardous waste, hazardous waste incineration, with energy recovery | APOS, U.

**Table S21.** Contribution to the Life Cycle Inventory (LCI) for the synthesis of 161.82 g of Hydrobromic Acid (HBr) according to Yoffe et al. [2].

| Description |                                  |                                | Amount                    | Process Data Source                                                                  |
|-------------|----------------------------------|--------------------------------|---------------------------|--------------------------------------------------------------------------------------|
| Input       | Materials                        | SO <sub>2</sub>                | 64.07 g                   | Ecoinvent v 3.8 <sup>1</sup>                                                         |
|             |                                  | Br <sub>2</sub>                | 159.81 g                  | Ecoinvent v 3.8 <sup>2</sup>                                                         |
|             |                                  | H <sub>2</sub> O               | 36 g                      | Ecoinvent v 3.8 <sup>3</sup>                                                         |
|             | Equipment/<br>plants             | Magnetic stirrer/heater        | 4*10 <sup>-5</sup> p      | Modelled from<br>Ecoinvent v 3.8 database<br>sub process as detailed in<br>Table S18 |
|             |                                  | Activated carbon air<br>filter | 1*10 <sup>-4</sup> p      | Modelled from<br>Ecoinvent v 3.8 database<br>sub process as detailed in<br>Table S4  |
|             |                                  | Aspiration system              | 2.51*10 <sup>-5</sup> p   | Modelled from<br>Ecoinvent v 3.8 database<br>sub process as detailed in<br>Table S3  |
| Trasnport   | Transport for large<br>equipment |                                | 4.17*10 <sup>-3</sup> tkm | Ecoinvent v 3.8 <sup>4</sup>                                                         |
|             | Transport for raw<br>materials   |                                | 25.99 kgkm                | Ecoinvent v 3.8 <sup>5</sup>                                                         |
| Energy      | Electric energy                  |                                | 5.67 kJ                   | Ecoinvent v 3.8 <sup>6</sup>                                                         |
|             |                                  |                                | 60 Wh                     | Ecoinvent v 3.8 <sup>7</sup>                                                         |
|             |                                  |                                | 14.77 kJ                  | Ecoinvent v 3.8 <sup>8</sup>                                                         |

|        |              |                  |                         |                                                        |
|--------|--------------|------------------|-------------------------|--------------------------------------------------------|
|        |              |                  | 238.32 Wh               | Ecoinvent v 3.8 <sup>9</sup>                           |
| Output | Air emission | Br <sub>2</sub>  | 2.53*10 <sup>-3</sup> g | SimaPro airborne emission substance list <sup>10</sup> |
|        |              | SO <sub>2</sub>  | 5.37*10 <sup>-3</sup> g | SimaPro airborne emission substance list <sup>11</sup> |
|        |              | H <sub>2</sub> O | 4.15*10 <sup>-6</sup> g | SimaPro airborne emission substance list <sup>12</sup> |
|        | End of life  | Waste water      | 53.60 cm <sup>3</sup>   | Ecoinvent v 3.8 <sup>13</sup>                          |

<sup>1</sup>The Ecoinvent process used was: Sulfur dioxide, liquid {RER}| production | APOS, U.

<sup>2</sup>The Ecoinvent process used was: Bromine {RER}| production | APOS, U.

<sup>3</sup>The Ecoinvent process used was: Water, deionised {Europe without Switzerland}| water production, deionised | APOS, U.

<sup>4</sup>Transport of large equipment (aspiration system and activated air carbon filter). The Ecoinvent process used was: Transport, freight, lorry 16-32 metric ton, EURO6 {RER}| transport, freight, lorry 16-32 metric ton, EURO6 | APOS, U. An average distance of 100km was considered.

<sup>5</sup>Transport for reagents. The Ecoinvent process used was: Transport, freight, lorry 3.5-7.5 metric ton, EURO6 {RER}| transport, freight, lorry 3.5-7.5 metric ton, EURO6 | APOS, U. An average distance of 100km was considered.

<sup>6</sup>Electric energy necessary for the heating of the reaction mixture up to 50°C. It is calculated using the expression  $m \cdot C_p \cdot DT$ , considering the specific heat in J/kg°C for each of the substances (Br<sub>2</sub>, SO<sub>2</sub> and H<sub>2</sub>O). The Ecoinvent process used was: Electricity, low voltage {IT}| electricity voltage transformation from medium to low voltage | APOS, U.

<sup>7</sup>Electric energy necessary to maintain the heating at 50°C of the reaction mixture for one hour. It is calculated using the Fourier Equation. The Ecoinvent process used was: Electricity, low voltage {IT}| electricity voltage transformation from medium to low voltage | APOS, U.

<sup>8</sup>Electric energy necessary to separate HBr and H<sub>2</sub>SO<sub>4</sub> at the end of the synthesis with a distillation process. It is calculated as  $m \cdot C_p \cdot DT$ , considering the specific heat in J/mol°C for each of the acid. The temperature considered is the distillation temperature of HBr, 124.3°C. The Ecoinvent process used was: Electricity, low voltage {IT}| electricity voltage transformation from medium to low voltage | APOS, U.

<sup>9</sup>Amount of Bromine released into the atmosphere, as calculated by the formula reported in equation 4 of the main manuscript.

<sup>10</sup>Amount of Sulfur dioxide released into the atmosphere, as calculated by the formula reported in equation 4 of the main manuscript.

<sup>11</sup>Amount of Water released into the atmosphere, as calculated by the formula reported in equation 4 of the main manuscript.

<sup>12</sup>End of life of Sulphuric acid obtained after the distillation process. The Ecoinvent process used was: Wastewater, average {Europe without Switzerland}| treatment of wastewater, average, capacity 1E9l/year | APOS, U.

**Table S22.** Contributions to the Life Cycle Inventory (LCI) for the synthesis of 712.16 g of Sodium Bromide (NaBr) according to the Patent CN103395806A.

|       | Description | Amount           | Process Data Source |
|-------|-------------|------------------|---------------------|
| Input | Materials   | HBr              | 560 g               |
|       |             | NaOH             | 450 g               |
|       |             | H <sub>2</sub> O | 1 l                 |

Modelled from Ecoinvent v 3.8 database sub process as detailed in Table S21

Ecoinvent v 3.8<sup>1</sup>

Ecoinvent v 3.8<sup>2</sup>

|                      |                 |                                  |                                      |                                                                                      |
|----------------------|-----------------|----------------------------------|--------------------------------------|--------------------------------------------------------------------------------------|
|                      |                 | H <sub>2</sub> O                 | 1.4 l                                | Ecoinvent v 3.8 <sup>3</sup>                                                         |
| Equipment/<br>plants |                 | Magnetic stirrer/heater          | 5*10 <sup>-5</sup> p                 | Modelled from<br>Ecoinvent v 3.8 database<br>sub process as detailed in<br>Table S18 |
|                      |                 | Round bottom flask               | 8.68*10 <sup>-5</sup> p              | Modelled from<br>Ecoinvent v 3.8 database<br>sub process as detailed in<br>Table S16 |
|                      |                 | Activated carbon air<br>filter   | 1.25*10 <sup>-4</sup> p              | Modelled from<br>Ecoinvent v 3.8 database<br>sub process as detailed in<br>Table S4  |
|                      |                 | Aspiration system                | 3.13*10 <sup>-5</sup> p              | Modelled from<br>Ecoinvent v 3.8 database<br>sub process as detailed in<br>Table S3  |
| Transport            |                 | Transport for large<br>equipment | 5.21*10 <sup>-3</sup> tkm            | Ecoinvent v 3.8 <sup>4</sup>                                                         |
|                      |                 | Transport of small<br>equipment  | 1.44*10 <sup>-2</sup> kgkm           | Ecoinvent v 3.8 <sup>5</sup>                                                         |
|                      |                 | Transport for raw<br>materials   | 341 kgkm                             | Ecoinvent v 3.8 <sup>6</sup>                                                         |
| Energy               |                 | Electric energy                  | 6 Wh                                 | Ecoinvent v 3.8 <sup>7</sup>                                                         |
|                      |                 |                                  | 470 kJ                               | Ecoinvent v 3.8 <sup>8</sup>                                                         |
|                      |                 |                                  | 558 Wh                               | Ecoinvent v 3.8 <sup>9</sup>                                                         |
| Output               | Air<br>emission | H <sub>2</sub> O                 | 2.05 g                               | SimaPro airborne<br>emission substance<br>list <sup>10</sup>                         |
|                      | End of life     | Waste water                      | 3.11*10 <sup>3</sup> cm <sup>3</sup> | Ecoinvent v 3.8 <sup>11</sup>                                                        |

<sup>1</sup>The Ecoinvent process used was: Sodium hydroxide, without water, in 50% solution state {RER} | chlor-alkali electrolysis, diaphragm cell | APOS, U.

<sup>2</sup>The Ecoinvent process used was: Water, deionised {Europe without Switzerland} | water production, deionised | APOS, U.

<sup>3</sup>The Ecoinvent process used was: Water, deionised {Europe without Switzerland} | water production, deionised | APOS, U.

<sup>4</sup>Transport of large equipment (aspiration system and activated air carbon filter). The Ecoinvet process used was: Transport, freight, lorry 16-32 metric ton, EURO6 {RER} | transport, freight, lorry 16-32 metric ton, EURO6 | APOS, U. An average distance of 100km was considered.

<sup>5</sup>Transport for small equipment. The Ecoinvent process used was: Transport, freight, lorry 3.5-7.5 metric ton, EURO6 {RER} | transport, freight, lorry 3.5-7.5 metric ton, EURO6 | APOS, U. An average distance of 100km was considered.

<sup>6</sup>Transport for reagents. The Ecoinvent process used was: Transport, freight, lorry 3.5-7.5 metric ton, EURO6 {RER} | transport, freight, lorry 3.5-7.5 metric ton, EURO6 | APOS, U. An average distance of 100km was considered.

<sup>7</sup>Electric energy necessary for the sole agitation of the reaction mixture for one hour. It is calculated as power\*time, considering the power of the sole agitation as 6W. The Ecoinvent process used was: Electricity, low voltage {IT} | electricity voltage transformation from medium to low voltage | APOS, U.

<sup>8</sup>Electric energy necessary for the heating to 180°C of NaBr and water during the crystallization phase. It is calculated using the expression  $m \cdot C_p \cdot DT$ , considering the specific heat in J/kg°C for each of the substances (NaBr and H<sub>2</sub>O). The Ecoinvent process used was: Electricity, low voltage {IT} | electricity voltage transformation from medium to low voltage | APOS, U.

<sup>9</sup>Electric energy necessary to maintain the heating at 180°C for one hour and half. It is calculated using the Fourier Equation. The Ecoinvent process used was: Electricity, low voltage {IT} | electricity voltage transformation from medium to low voltage | APOS, U.

<sup>10</sup>Amount of Water released into the atmosphere, as calculated by the formula reported in equation 4 of the main manuscript.

<sup>11</sup>End of life of the water produced during the reaction. The Ecoinvent process used was: Wastewater, average {Europe without Switzerland} | treatment of wastewater, average, capacity 1E9l/year | APOS, U.

**Table S23.** Contributions to the Life Cycle Inventory (LCI) for the synthesis of 14.94 g of Bromobutane according to Williams et al. [3].

| Description          |                         | Amount                         | Process Data Source                                                         |
|----------------------|-------------------------|--------------------------------|-----------------------------------------------------------------------------|
| Input                | Materials               | NaBr                           | 13.3 g                                                                      |
|                      |                         |                                | Modelled from Ecoinvent v 3.8 database sub process as detailed in Table S22 |
|                      |                         | H <sub>2</sub> O               | 15 g                                                                        |
|                      |                         | 1-butanol                      | 8.10 g                                                                      |
|                      |                         | H <sub>2</sub> SO <sub>4</sub> | 21.045 g                                                                    |
|                      |                         | H <sub>2</sub> O               | 10 g                                                                        |
|                      |                         | H <sub>2</sub> SO <sub>4</sub> | 18.3 g                                                                      |
|                      |                         | NaOH                           | 21.3 g                                                                      |
|                      |                         | CaCl <sub>2</sub>              | 1 g                                                                         |
|                      |                         | Xylene                         | 17.80 g                                                                     |
| Equipment/<br>plants | Magnetic stirrer/heater | 6*10 <sup>-5</sup> p           | Modelled from Ecoinvent v 3.8 database sub process as detailed in Table S18 |
|                      | Round bottom flask      | 6.94*10 <sup>-5</sup> p        | Modelled from Ecoinvent v 3.8 database sub process as detailed in Table S15 |
|                      | Separatory funnel       | 8.68*10 <sup>-6</sup> p        | Modelled from Ecoinvent v 3.8 database sub process as detailed in Table S9  |
|                      | Reflux condenser        | 2.61*10 <sup>-5</sup> p        | Modelled from Ecoinvent v 3.8 database sub process as detailed in Table S13 |
|                      | Distillation column     | 6.94*10 <sup>-5</sup> p        | Modelled from Ecoinvent v 3.8 database                                      |
|                      |                         |                                |                                                                             |

|             |                               |                                |                                                                             |
|-------------|-------------------------------|--------------------------------|-----------------------------------------------------------------------------|
|             |                               |                                | sub process as detailed in Table S17                                        |
|             | Flask                         | $1.74 \cdot 10^{-5}$ p         | Modelled from Ecoinvent v 3.8 database sub process as detailed in Table S5  |
|             | Rubber tube                   | $1.70 \cdot 10^{-4}$ p         | Modelled from Ecoinvent v 3.8 database sub process as detailed in Table S14 |
|             | Activated carbon air filter   | $2 \cdot 10^{-4}$ p            | Modelled from Ecoinvent v 3.8 database sub process as detailed in Table S4  |
|             | Aspiration system             | $5.02 \cdot 10^{-5}$ p         | Modelled from Ecoinvent v 3.8 database sub process as detailed in Table S3  |
| Transport   | Transport for large equipment | $8.34 \cdot 10^{-3}$ kgkm      | Ecoinvent v 3.8 <sup>9</sup>                                                |
|             | Transport for raw materials   | 12.58 kgkm                     | Ecoinvent v 3.8 <sup>10</sup>                                               |
|             | Transport for small equipment | $2.08 \cdot 10^{-2}$ kgkm      | Ecoinvent v 3.8 <sup>11</sup>                                               |
| Energy      | Electric energy               | 2.5 kJ                         | Ecoinvent v 3.8 <sup>12</sup>                                               |
|             |                               | 17.465 kJ                      | Ecoinvent v 3.8 <sup>13</sup>                                               |
|             |                               | 315 Wh                         | Ecoinvent v 3.8 <sup>14</sup>                                               |
|             |                               | 26.51 kJ                       | Ecoinvent v 3.8 <sup>15</sup>                                               |
|             |                               | 12.49 kJ                       | Ecoinvent v 3.8 <sup>16</sup>                                               |
|             |                               | 0.34 kWh                       | Ecoinvent v 3.8 <sup>17</sup>                                               |
| Output      | Air emission                  | 1-Butanol                      | SimaPro airborne emission substance list <sup>18</sup>                      |
|             |                               | H <sub>2</sub> SO <sub>4</sub> | SimaPro airborne emission substance list <sup>19</sup>                      |
|             |                               | H <sub>2</sub> O               | SimaPro airborne emission substance list <sup>20</sup>                      |
|             |                               | Xylene                         | SimaPro airborne emission substance list <sup>21</sup>                      |
| End of life | Spent solvent mixture         | 113.27 g                       | Ecoinvent v 3.8 <sup>22</sup>                                               |

<sup>1</sup>The Ecoinvent process used was: Water, deionised {Europe without Switzerland} | water production, deionised | APOS, U.



- <sup>2</sup>The Ecoinvent process used was: 1-butanol {RER}| hydroformylation of propylene | APOS, U.
- <sup>3</sup>The Ecoinvent process used was: Sulfuric acid {RER}| production | APOS, U.
- <sup>4</sup>The Ecoinvent process use was: Water, deionised {Europe without Switzerland}| water production, deionised | APOS, U.
- <sup>5</sup>The Ecoinvent process used was: Sulfuric acid {RER}| production | APOS, U.
- <sup>6</sup>The Ecoinvent process used was: Sodium hydroxide, without water, in 50% solution state {RER}| chlor-alkali electrolysis, mercury cell | APOS, U.
- <sup>7</sup>The Ecoinvent process used was: Calcium chloride {RER}| soda production, solvay process | APOS, U.
- <sup>8</sup>The Ecoinvent process used was: Xylene {RER}| production | APOS, U.
- <sup>9</sup>Transport of large equipment (aspiration system and activated air carbon filter). The Ecoinvent process used was: Transport, freight, lorry 16-32 metric ton, EURO6 {RER}| transport, freight, lorry 16-32 metric ton, EURO6 | APOS, U. An average distance of 100km was considered.
- <sup>10</sup>Transport for reagents. The Ecoinvent process used was: Transport, freight, lorry 3.5-7.5 metric ton, EURO6 {RER}| transport, freight, lorry 3.5-7.5 metric ton, EURO6 | APOS, U. An average distance of 100km was considered.
- <sup>11</sup>Transport for small laboratory equipment. The Ecoinvent process used was: Transport, freight, lorry 3.5-7.5 metric ton, EURO6 {RER}| transport, freight, lorry 3.5-7.5 metric ton, EURO6 | APOS, U. An average distance of 100 km was considered.
- <sup>12</sup>Electric energy necessary for the cooling down to 0°C of the reaction mixture containing NaBr, 1-buthanol and sulphuric acid. It is calculated using the expression  $m \cdot Cp \cdot DT$ , considering the specific heat in J/kg°C for each of the substances. The Ecoinvent process used was: Electricity, low voltage {IT}| electricity voltage transformation from medium to low voltage | APOS, U.
- <sup>13</sup>Electric energy necessary for the heating up to for the reaction mixture to its boiling point, 200°C. It is calculated using the expression  $m \cdot Cp \cdot DT$ , considering the specific heat in J/kg°C for each of the substances. The Ecoinvent process used was: Electricity, low voltage {IT}| electricity voltage transformation from medium to low voltage | APOS, U.
- <sup>14</sup>Electric energy necessary to maintain the heating at 200°C of the reaction mixture for 45 minutes. It is calculated using the Fourier Equation. The Ecoinvent process used was: Electricity, low voltage {IT}| electricity voltage transformation from medium to low voltage | APOS, U.
- <sup>15</sup>Electric energy necessary for the first distillation process at 115°C in order to recover the final product, bromobutane, from the other co-products. It is calculated using the expression  $m \cdot Cp \cdot DT$ , considering the specific heat in J/kg°C for each of the substances. The Ecoinvent process used was: Electricity, low voltage {IT}| electricity voltage transformation from medium to low voltage | APOS, U.
- <sup>16</sup>Electric energy necessary for the second distillation process at 102°C to purify the finale product, bromobutane, from impurities. It is calculated using the expression  $m \cdot Cp \cdot DT$ , considering the specific heat in J/kg°C for each of the substances. The Ecoinvent process used was: Electricity, low voltage {IT}| electricity voltage transformation from medium to low voltage | APOS, U.
- <sup>17</sup>Electric energy necessary to the use of the aspiration system for the whole synthesis time, i.e. 4 h. The power was calculated by considering the air flow rate of 250 m<sup>3</sup>/h, a total load loss of 110.8076 kg/m<sup>2</sup>, and an efficiency of 90%: Electricity, low voltage {IT}| electricity voltage transformation from medium to low voltage | APOS, U.
- <sup>18</sup>Amount of 1-Buthanol released into the atmosphere, as calculated by the formula reported in equation 1 of the main manuscript.
- <sup>19</sup>Amount of Sulphuric acid released into the atmosphere, as calculated by the formula reported in equation 4 of the main manuscript.
- <sup>20</sup>Amount of Water released into the atmosphere, as calculated by the formula reported in equation 4 of the main manuscript.
- <sup>21</sup>Amount of Xylene released into the atmosphere, as calculated by the formula reported in equation 4 of the main manuscript.
- <sup>22</sup>End of life of everything that is not the final product. The Ecoinvent process used was: Spent solvent mixture {Europe without Switzerland}| treatment of spent solvent mixture, hazardous waste incineration, with energy recovery | APOS, U.

**Table S24.** Contributions to the Life Cycle Inventory (LCI) for the synthesis of 0.53968 g of 4-butoxy-3-methoxybenzaldehyde. This is Reaction 1 (Run 11), carried in DMF as solvent with a reaction time of 8 hours, as reported in Table 1 in the main manuscript.

| Description          |                         | Amount                          | Process Data Source                                                         |
|----------------------|-------------------------|---------------------------------|-----------------------------------------------------------------------------|
| Input                | Materials               | DMF                             | Ecoinvent v 3.8 <sup>1</sup>                                                |
|                      |                         | K <sub>2</sub> CO <sub>3</sub>  | Ecoinvent v 3.8 <sup>2</sup>                                                |
|                      |                         | KCl                             | Ecoinvent v 3.8 <sup>3</sup>                                                |
|                      |                         | Bromobutane                     | Modelled from Ecoinvent v 3.8 database sub process as detailed in Table S23 |
|                      |                         | Vanillin                        | Modelled from Ecoinvent v 3.8 database sub process as detailed in Table S20 |
|                      |                         | H <sub>2</sub> O                | Ecoinvent v 3.8 <sup>4</sup>                                                |
|                      |                         | Diethyl ether                   | Ecoinvent v 3.8 <sup>5</sup>                                                |
|                      |                         | Mg <sub>2</sub> SO <sub>4</sub> | Ecoinvent v 3.8 <sup>6</sup>                                                |
|                      |                         | Silicon oil                     | Ecoinvent v 3.8 <sup>7</sup>                                                |
|                      |                         |                                 |                                                                             |
| Equipment/<br>plants | Magnetic stirrer/heater | 1.8*10 <sup>-4</sup> p          | Modelled from Ecoinvent v 3.8 database sub process as detailed in Table S18 |
|                      |                         | Round bottom flask              | Modelled from Ecoinvent v 3.8 database sub process as detailed in Table S19 |
|                      |                         | Separatory funnel               | Modelled from Ecoinvent v 3.8 database sub process as detailed in Table S9  |
|                      |                         | Reflux condenser                | Modelled from Ecoinvent v 3.8 database sub process as detailed in Table S13 |
|                      |                         | Silicon oil container           | Modelled from Ecoinvent v 3.8 database sub process as detailed in Table S6  |
|                      |                         | Funnel                          | Modelled from Ecoinvent v 3.8 database sub process as detailed in Table S8  |
|                      |                         | Filter                          | Modelled from Ecoinvent v 3.8 database                                      |
|                      |                         |                                 |                                                                             |
|                      |                         |                                 |                                                                             |
|                      |                         |                                 |                                                                             |

|             |                               |                            |                                                                             |                                                        |
|-------------|-------------------------------|----------------------------|-----------------------------------------------------------------------------|--------------------------------------------------------|
|             |                               |                            | sub process as detailed in Table S7                                         |                                                        |
|             | Fitting reflux condenser      | 3.12*10 <sup>-4</sup> p    | Modelled from Ecoinvent v 3.8 database sub process as detailed in Table S12 |                                                        |
|             | Rubber tube                   | 5.56*10 <sup>-4</sup> p    | Modelled from Ecoinvent v 3.8 database sub process as detailed in Table S14 |                                                        |
|             | Activated carbon air filter   | 2*10 <sup>-4</sup> p       | Modelled from Ecoinvent v 3.8 database sub process as detailed in Table S4  |                                                        |
|             | Aspiration system             | 5.02*10 <sup>-5</sup> p    | Modelled from Ecoinvent v 3.8 database sub process as detailed in Table S3  |                                                        |
| Transport   | Transport for large equipment | 2.29*10 <sup>-2</sup> tkm  | Ecoinvent v 3.8 <sup>8</sup>                                                |                                                        |
|             | Transport for raw materials   | 6.54 kgkm                  | Ecoinvent v 3.8 <sup>9</sup>                                                |                                                        |
|             | Transport for small equipment | 6.89*10 <sup>-2</sup> kgkm | Ecoinvent v 3.8 <sup>10</sup>                                               |                                                        |
| Energy      | Electric energy               | 42.90 kJ                   | Ecoinvent v 3.8 <sup>11</sup>                                               |                                                        |
|             |                               | 1440 Wh                    | Ecoinvent v 3.8 <sup>12</sup>                                               |                                                        |
|             |                               | 3.015 kJ                   | Ecoinvent v 3.8 <sup>13</sup>                                               |                                                        |
|             |                               | 630 Wh                     | Ecoinvent v 3.8 <sup>14</sup>                                               |                                                        |
|             |                               | 500 Wh                     | Ecoinvent v 3.8 <sup>15</sup>                                               |                                                        |
|             |                               | 0.92 kWh                   | Ecoinvent v 3.8 <sup>16</sup>                                               |                                                        |
| Output      | Air emission                  | DMF                        | 7.28*10 <sup>-7</sup> g                                                     | SimaPro airborne emission substance list <sup>17</sup> |
|             |                               | HBr                        | 5.41*10 <sup>-3</sup> g                                                     | SimaPro airborne emission substance list <sup>18</sup> |
|             |                               | H <sub>2</sub> O           | 1.15*10 <sup>-6</sup> g                                                     | SimaPro airborne emission substance list <sup>19</sup> |
|             |                               | Diethyl ether              | 5.291*10 <sup>-4</sup> g                                                    | SimaPro airborne emission substance list <sup>20</sup> |
| End of life | Spent solvent mixture         | 31.125 g                   | Ecoinvent v 3.8 <sup>21</sup>                                               |                                                        |
|             | Incineration                  | 2.457 g                    | Ecoinvent v 3.8 <sup>22</sup>                                               |                                                        |

<sup>1</sup>The Ecoinvent process used was: N,N-dimethylformamide {RER} | production | APOS, U.

- <sup>2</sup>The Ecoinvent process used was: Potassium carbonate {RER}| oxidation of manganese dioxide | APOS, U.
- <sup>3</sup>The Ecoinvent process used was: Potassium chloride {RER}| potassium chloride production | APOS, U. During the experimental work potassium iodide was used. Since it is not present in the database, potassium chloride was used as proxy.
- <sup>4</sup>The Ecoinvent process use was: Water, deionised {Europe without Switzerland}| water production, deionised | APOS, U.
- <sup>5</sup>The Ecoinvent process used was: Diethyl ether, without water, in 99.95% solution state {RER}| ethylene hydration | APOS, U.
- <sup>6</sup>The Ecoinvent process used was: Magnesium sulfate {RER}| production | APOS, U.
- <sup>7</sup>The Ecoinvent process used was: Silicone product {RER}| production | APOS, U.
- <sup>8</sup>Transport of large equipment (aspiration system and activated air carbon filter). The Ecoinvent process used was: Transport, freight, lorry 16-32 metric ton, EURO6 {RER}| transport, freight, lorry 16-32 metric ton, EURO6 | APOS, U. An average distance of 100km was considered.
- <sup>9</sup>Transport for reagents. The Ecoinvent process used was: Transport, freight, lorry 3.5-7.5 metric ton, EURO6 {RER}| transport, freight, lorry 3.5-7.5 metric ton, EURO6 | APOS, U. An average distance of 100km was considered.
- <sup>10</sup>Transport for small laboratory equipment. The Ecoinvent process used was: Transport, freight, lorry 3.5-7.5 metric ton, EURO6 {RER}| transport, freight, lorry 3.5-7.5 metric ton, EURO6 | APOS, U. An average distance of 100 km was considered.
- <sup>11</sup>Electric energy necessary for the heating up to 100°C of the reaction mixture containing DMF, Vanillin and Bromobutane. It is calculated using the expression  $m \cdot C_p \cdot DT$ , considering the specific heat in J/kg°C for each of the substances. The Ecoinvent process used was: Electricity, low voltage {IT}| electricity voltage transformation from medium to low voltage | APOS, U.
- <sup>12</sup>Electric energy necessary to maintain the heating at 100°C of the reaction mixture for 8 hours. It is calculated using the Fourier Equation. The Ecoinvent process used was: Electricity, low voltage {IT}| electricity voltage transformation from medium to low voltage | APOS, U.
- <sup>13</sup>Electric energy necessary to eliminate the remaining solvent (DMF) using the rotavapor. It is calculated as  $H_{vap}DMF \cdot molDMF$ , considering  $H_{vap}DMF$  as its latent heat of vaporization (46.7 kJ/mol) and  $molDMF$  as the moles of the solvent. The Ecoinvent process used was: Electricity, low voltage {IT}| electricity voltage transformation from medium to low voltage | APOS, U.
- <sup>14</sup>Electric energy necessary to use the heating stirrer during the workup phase for 1 hour. It is calculated as power\*time, considering 630W as the heating stirrer power. The Ecoinvent process used was: Electricity, low voltage {IT}| electricity voltage transformation from medium to low voltage | APOS, U.
- <sup>15</sup>Electric energy necessary to use the rotavapor after the workup phase for 1 hour. It is calculated as power\*time, considering 500W as the rotavapor power. The Ecoinvent process used was: Electricity, low voltage {IT}| electricity voltage transformation from medium to low voltage | APOS, U.
- <sup>16</sup>Electric energy necessary to the use of the aspiration system for the whole synthesis time, i.e. 11 h. The power was calculated by considering the air flow rate of 250 m<sup>3</sup>/h, a total load loss of 110.8076 kg/m<sup>2</sup>, and an efficiency of 90%: Electricity, low voltage {IT}| electricity voltage transformation from medium to low voltage | APOS, U.
- <sup>17</sup>Amount of DMF released into the atmosphere, as calculated by the formula reported in equation 1 of the main manuscript.
- <sup>18</sup>Amount of HBr released into the atmosphere, as calculated by the formula reported in equation 4 of the main manuscript.
- <sup>19</sup>Amount of Water released into the atmosphere, as calculated by the formula reported in equation 4 of the main manuscript.
- <sup>20</sup>Amount of Diethyl ether released into the atmosphere, as calculated by the formula reported in equation 4 of the main manuscript.
- <sup>21</sup>End of life of liquid waste, including DMF, Diethyl ether and water. The Ecoinvent process used was: Spent solvent mixture {Europe without Switzerland}| treatment of spent solvent mixture, hazardous waste incineration, with energy recovery | APOS, U.
- <sup>22</sup>End of life of the solid waste recovered after the filtration following the first part of the synthesis. The Ecoinvent process used was: Hazardous waste, for incineration {RoW}| treatment of hazardous waste, hazardous waste incineration, with energy recovery | APOS, U.

**Table S25.** Contributions to the Life Cycle Inventory (LCI) for the synthesis of 0.53443 g of 4-butoxy-3-methoxybenzaldehyde. This is Reaction 2 (Run 7), carried in Acetonitrile as solvent with a reaction time of 24 hours, as reported in Table 1 in the main manuscript.

| Description          |                         |                                 | Amount                  | Process Data Source                                                         |
|----------------------|-------------------------|---------------------------------|-------------------------|-----------------------------------------------------------------------------|
| Input                | Materials               | ACN                             | 15.66 g                 | Ecoinvent v 3.8 <sup>1</sup>                                                |
|                      |                         | K <sub>2</sub> CO <sub>3</sub>  | 0.471 g                 | Ecoinvent v 3.8 <sup>2</sup>                                                |
|                      |                         | KCl                             | 1.058 g                 | Ecoinvent v 3.8 <sup>3</sup>                                                |
|                      |                         | Bromobutane                     | 0.908 g                 | Modelled from Ecoinvent v 3.8 database sub process as detailed in Table S23 |
|                      |                         | Vanillin                        | 0.501 g                 | Modelled from Ecoinvent v 3.8 database sub process as detailed in Table S20 |
|                      |                         | H <sub>2</sub> O                | 5 g                     | Ecoinvent v 3.8 <sup>4</sup>                                                |
|                      |                         | Diethyl ether                   | 21.405 g                | Ecoinvent v 3.8 <sup>5</sup>                                                |
|                      |                         | Mg <sub>2</sub> SO <sub>4</sub> | 1 g                     | Ecoinvent v 3.8 <sup>6</sup>                                                |
|                      |                         | Silicon oil                     | 1.72*10 <sup>-2</sup> p | Ecoinvent v 3.8 <sup>7</sup>                                                |
|                      |                         |                                 |                         |                                                                             |
| Equipment/<br>plants | Magnetic stirrer/heater |                                 | 5*10 <sup>-4</sup> p    | Modelled from Ecoinvent v 3.8 database sub process as detailed in Table S18 |
|                      |                         | Round bottom flask              | 9.03*10 <sup>-4</sup> p | Modelled from Ecoinvent v 3.8 database sub process as detailed in Table S15 |
|                      |                         | Separatory funnel               | 2.33*10 <sup>-5</sup> p | Modelled from Ecoinvent v 3.8 database sub process as detailed in Table S9  |
|                      |                         | Reflux condenser                | 8.69*10 <sup>-4</sup> p | Modelled from Ecoinvent v 3.8 database sub process as detailed in Table S13 |
|                      |                         | Silicon oil container           | 9.03*10 <sup>-4</sup> p | Modelled from Ecoinvent v 3.8 database sub process as detailed in Table S6  |
|                      |                         | Funnel                          | 2.90*10 <sup>-6</sup> p | Modelled from Ecoinvent v 3.8 database sub process as detailed in Table S8  |
|                      |                         | Filter                          | 3.18*10 <sup>-6</sup> p | Modelled from Ecoinvent v 3.8 database                                      |
|                      |                         |                                 |                         |                                                                             |

|             |                               |                           |                                                                             |
|-------------|-------------------------------|---------------------------|-----------------------------------------------------------------------------|
|             |                               |                           | sub process as detailed in Table S7                                         |
|             | Fitting reflux condenser      | $8.69 \cdot 10^{-4}$ p    | Modelled from Ecoinvent v 3.8 database sub process as detailed in Table S12 |
|             | Rubber tube                   | $1.67 \cdot 10^{-3}$ p    | Modelled from Ecoinvent v 3.8 database sub process as detailed in Table S14 |
|             | Activated carbon air filter   | $1.35 \cdot 10^{-3}$ p    | Modelled from Ecoinvent v 3.8 database sub process as detailed in Table S4  |
|             | Aspiration system             | $3.38 \cdot 10^{-4}$ p    | Modelled from Ecoinvent v 3.8 database sub process as detailed in Table S3  |
| Transport   | Transport for large equipment | $5.63 \cdot 10^{-2}$ tkm  | Ecoinvent v 3.8 <sup>8</sup>                                                |
|             | Transport for raw materials   | 8.69 kgkm                 | Ecoinvent v 3.8 <sup>9</sup>                                                |
|             | Transport for small equipment | $1.91 \cdot 10^{-1}$ kgkm | Ecoinvent v 3.8 <sup>10</sup>                                               |
| Energy      | Electric energy               | 28.25 kJ                  | Ecoinvent v 3.8 <sup>11</sup>                                               |
|             |                               | 3168 Wh                   | Ecoinvent v 3.8 <sup>12</sup>                                               |
|             |                               | 11.37 kJ                  | Ecoinvent v 3.8 <sup>13</sup>                                               |
|             |                               | 630 Wh                    | Ecoinvent v 3.8 <sup>14</sup>                                               |
|             |                               | 500 Wh                    | Ecoinvent v 3.8 <sup>15</sup>                                               |
|             |                               | 2.23 kWh                  | Ecoinvent v 3.8 <sup>16</sup>                                               |
| Output      | Air emission                  | ACN                       | SimaPro airborne emission substance list <sup>17</sup>                      |
|             |                               | HBr                       | SimaPro airborne emission substance list <sup>18</sup>                      |
|             |                               | H <sub>2</sub> O          | SimaPro airborne emission substance list <sup>19</sup>                      |
|             |                               | Diethyl ether             | SimaPro airborne emission substance list <sup>20</sup>                      |
| End of life | Spent solvent mixture         | 42.065 g                  | Ecoinvent v 3.8 <sup>21</sup>                                               |
|             | Incineration                  | 2.529 g                   | Ecoinvent v 3.8 <sup>22</sup>                                               |

<sup>1</sup>The Ecoinvent process used was: Acetonitrile {RER} | Sohio process | APOS, U.

- <sup>2</sup>The Ecoinvent process used was: Potassium carbonate {RER}| oxidation of manganese dioxide | APOS, U.
- <sup>3</sup>The Ecoinvent process used was: Potassium chloride {RER}| potassium chloride production | APOS, U. During the experimental work potassium iodide was used. Since it is not present in the database, potassium chloride was used as proxy.
- <sup>4</sup>The Ecoinvent process use was: Water, deionised {Europe without Switzerland}| water production, deionised | APOS, U.
- <sup>5</sup>The Ecoinvent process used was: Diethyl ether, without water, in 99.95% solution state {RER}| ethylene hydration | APOS, U.
- <sup>6</sup>The Ecoinvent process used was: Magnesium sulfate {RER}| production | APOS, U.
- <sup>7</sup>The Ecoinvent process used was: Silicone product {RER}| production | APOS, U.
- <sup>8</sup>Transport of large equipment (aspiration system and activated air carbon filter). The Ecoinvent process used was: Transport, freight, lorry 16-32 metric ton, EURO6 {RER}| transport, freight, lorry 16-32 metric ton, EURO6 | APOS, U. An average distance of 100km was considered.
- <sup>9</sup>Transport for reagents. The Ecoinvent process used was: Transport, freight, lorry 3.5-7.5 metric ton, EURO6 {RER}| transport, freight, lorry 3.5-7.5 metric ton, EURO6 | APOS, U. An average distance of 100km was considered.
- <sup>10</sup>Transport for small laboratory equipment. The Ecoinvent process used was: Transport, freight, lorry 3.5-7.5 metric ton, EURO6 {RER}| transport, freight, lorry 3.5-7.5 metric ton, EURO6 | APOS, U. An average distance of 100 km was considered.
- <sup>11</sup>Electric energy necessary for the heating up to 100°C of the reaction mixture containing ACN, Vanillin and Bromobutane. It is calculated using the expression  $m \cdot C_p \cdot DT$ , considering the specific heat in J/kg°C for each of the substances. The Ecoinvent process used was: Electricity, low voltage {IT}| electricity voltage transformation from medium to low voltage | APOS, U.
- <sup>12</sup>Electric energy necessary to maintain the heating at 100°C of the reaction mixture for 24 hours. It is calculated using the Fourier Equation. The Ecoinvent process used was: Electricity, low voltage {IT}| electricity voltage transformation from medium to low voltage | APOS, U.
- <sup>13</sup>Electric energy necessary to eliminate the remaining solvent (ACN) using the rotavapor. It is calculated as  $H_{vap}ACN \cdot molACN$ , considering  $H_{vap}ACN$  as its latent heat of vaporization (29.8 kJ/mol) and  $molACN$  as the moles of the solvent. The Ecoinvent process used was: Electricity, low voltage {IT}| electricity voltage transformation from medium to low voltage | APOS, U.
- <sup>14</sup>Electric energy necessary to use the heating stirrer during the workup phase for 1 hour. It is calculated as power\*time, considering 630W as the heating stirrer power. The Ecoinvent process used was: Electricity, low voltage {IT}| electricity voltage transformation from medium to low voltage | APOS, U.
- <sup>15</sup>Electric energy necessary to use the rotavapor after the workup phase for 1 hour. It is calculated as power\*time, considering 500W as the rotavapor power. The Ecoinvent process used was: Electricity, low voltage {IT}| electricity voltage transformation from medium to low voltage | APOS, U.
- <sup>16</sup>Electric energy necessary to the use of the aspiration system for the whole synthesis time, i.e. 27 h. The power was calculated by considering the air flow rate of 250 m<sup>3</sup>/h, a total load loss of 110.8076 kg/m<sup>2</sup>, and an efficiency of 90%: Electricity, low voltage {IT}| electricity voltage transformation from medium to low voltage | APOS, U.
- <sup>17</sup>Amount of ACN released into the atmosphere, as calculated by the formula reported in equation 1 of the main manuscript.
- <sup>18</sup>Amount of HBr released into the atmosphere, as calculated by the formula reported in equation 4 of the main manuscript.
- <sup>19</sup>Amount of Water released into the atmosphere, as calculated by the formula reported in equation 4 of the main manuscript.
- <sup>20</sup>Amount of Diethyl ether released into the atmosphere, as calculated by the formula reported in equation 4 of the main manuscript.
- <sup>21</sup>End of life of liquid waste, including ACN, Diethyl ether and water. The Ecoinvent process used was: Spent solvent mixture {Europe without Switzerland}| treatment of spent solvent mixture, hazardous waste incineration, with energy recovery | APOS, U.
- <sup>22</sup>End of life of the solid waste recovered after the filtration following the first part of the synthesis. The Ecoinvent process used was: Hazardous waste, for incineration {RoW}| treatment of hazardous waste, hazardous waste incineration, with energy recovery | APOS, U.

**Table S26.** Contributions to the Life Cycle Inventory (LCI) for the synthesis of 0.534449 g of 4-butoxy-3-methoxybenzaldehyde. This is Reaction 3 (Run 3), carried in Acetone as solvent with a reaction time of 24 hours, as reported in Table 1 in the main manuscript.

| Description |                      |                                 | Amount                  | Process Data Source                                                         |
|-------------|----------------------|---------------------------------|-------------------------|-----------------------------------------------------------------------------|
| Input       | Materials            | Acetone                         | 15.68 g                 | Ecoinvent v 3.8 <sup>1</sup>                                                |
|             |                      | K <sub>2</sub> CO <sub>3</sub>  | 0.5185 g                | Ecoinvent v 3.8 <sup>2</sup>                                                |
|             |                      | KCl                             | 1.019 g                 | Ecoinvent v 3.8 <sup>3</sup>                                                |
|             |                      | Bromobutane                     | 0.452 g                 | Modelled from Ecoinvent v 3.8 database sub process as detailed in Table S23 |
|             |                      | Vanillin                        | 0.503 g                 | Modelled from Ecoinvent v 3.8 database sub process as detailed in Table S20 |
|             |                      | H <sub>2</sub> O                | 5 g                     | Ecoinvent v 3.8 <sup>4</sup>                                                |
|             |                      | Diethyl ether                   | 21.405 g                | Ecoinvent v 3.8 <sup>5</sup>                                                |
|             |                      | Mg <sub>2</sub> SO <sub>4</sub> | 1 g                     | Ecoinvent v 3.8 <sup>6</sup>                                                |
|             |                      | Silicon oil                     | 1.72*10 <sup>-2</sup> p | Ecoinvent v 3.8 <sup>7</sup>                                                |
|             | Equipment/<br>plants | Magnetic stirrer/heater         | 5*10 <sup>-4</sup> p    | Modelled from Ecoinvent v 3.8 database sub process as detailed in Table S18 |
|             |                      | Round bottom flask              | 9.03*10 <sup>-4</sup> p | Modelled from Ecoinvent v 3.8 database sub process as detailed in Table S15 |
|             |                      | Separatory funnel               | 2.33*10 <sup>-5</sup> p | Modelled from Ecoinvent v 3.8 database sub process as detailed in Table S9  |
|             |                      | Reflux condenser                | 8.69*10 <sup>-4</sup> p | Modelled from Ecoinvent v 3.8 database sub process as detailed in Table S13 |
|             |                      | Silicon oil container           | 9.03*10 <sup>-4</sup> p | Modelled from Ecoinvent v 3.8 database sub process as detailed in Table S6  |
|             |                      | Funnel                          | 2.90*10 <sup>-6</sup> p | Modelled from Ecoinvent v 3.8 database sub process as detailed in Table S8  |
|             |                      | Filter                          | 3.18*10 <sup>-6</sup> p | Modelled from Ecoinvent v 3.8 database                                      |



|                             |                               |                            |                                                                             |                                                        |
|-----------------------------|-------------------------------|----------------------------|-----------------------------------------------------------------------------|--------------------------------------------------------|
|                             |                               |                            | sub process as detailed in Table S7                                         |                                                        |
| Fitting reflux condenser    |                               | 8.69*10 <sup>-4</sup> p    | Modelled from Ecoinvent v 3.8 database sub process as detailed in Table S12 |                                                        |
| Rubber tube                 |                               | 1.67*10 <sup>-3</sup> p    | Modelled from Ecoinvent v 3.8 database sub process as detailed in Table S14 |                                                        |
| Activated carbon air filter |                               | 1.35*10 <sup>-3</sup> p    | Modelled from Ecoinvent v 3.8 database sub process as detailed in Table S4  |                                                        |
| Aspiration system           |                               | 3.38*10 <sup>-4</sup> p    | Modelled from Ecoinvent v 3.8 database sub process as detailed in Table S3  |                                                        |
| Transport                   | Transport for large equipment | 5.63*10 <sup>-2</sup> tkm  | Ecoinvent v 3.8 <sup>8</sup>                                                |                                                        |
|                             | Transport for raw materials   | 8.61 kgkm                  | Ecoinvent v 3.8 <sup>9</sup>                                                |                                                        |
|                             | Transport for small equipment | 1.91*10 <sup>-1</sup> kgkm | Ecoinvent v 3.8 <sup>10</sup>                                               |                                                        |
| Energy                      | Electric energy               | 11.40 kJ                   | Ecoinvent v 3.8 <sup>11</sup>                                               |                                                        |
|                             |                               | 1440 Wh                    | Ecoinvent v 3.8 <sup>12</sup>                                               |                                                        |
|                             |                               | 8.64 kJ                    | Ecoinvent v 3.8 <sup>13</sup>                                               |                                                        |
|                             |                               | 630 Wh                     | Ecoinvent v 3.8 <sup>14</sup>                                               |                                                        |
|                             |                               | 500 Wh                     | Ecoinvent v 3.8 <sup>15</sup>                                               |                                                        |
|                             |                               | 2.26 kWh                   | Ecoinvent v 3.8 <sup>16</sup>                                               |                                                        |
| Output                      | Air emission                  | Acetone                    | 1.44*10 <sup>-4</sup> g                                                     | SimaPro airborne emission substance list <sup>17</sup> |
|                             |                               | HBr                        | 3.43*10 <sup>-3</sup> g                                                     | SimaPro airborne emission substance list <sup>18</sup> |
|                             |                               | H <sub>2</sub> O           | 1.15*10 <sup>-6</sup> g                                                     | SimaPro airborne emission substance list <sup>19</sup> |
|                             |                               | Diethyl ether              | 5.29*10 <sup>-4</sup> g                                                     | SimaPro airborne emission substance list <sup>20</sup> |
| End of life                 | Spent solvent mixture         | 42.085 g                   | Ecoinvent v 3.8 <sup>21</sup>                                               |                                                        |
|                             | Incineration                  | 2.538 g                    | Ecoinvent v 3.8 <sup>22</sup>                                               |                                                        |

<sup>1</sup>The Ecoinvent process used was: Acetone, liquid {RER}| production | APOS, U

- <sup>2</sup>The Ecoinvent process used was: Potassium carbonate {RER}| oxidation of manganese dioxide | APOS, U.
- <sup>3</sup>The Ecoinvent process used was: Potassium chloride {RER}| potassium chloride production | APOS, U. During the experimental work potassium iodide was used. Since it is not present in the database, potassium chloride was used as proxy.
- <sup>4</sup>The Ecoinvent process use was: Water, deionised {Europe without Switzerland}| water production, deionised | APOS, U.
- <sup>5</sup>The Ecoinvent process used was: Diethyl ether, without water, in 99.95% solution state {RER}| ethylene hydration | APOS, U.
- <sup>6</sup>The Ecoinvent process used was: Magnesium sulfate {RER}| production | APOS, U.
- <sup>7</sup>The Ecoinvent process used was: Silicone product {RER}| production | APOS, U.
- <sup>8</sup>Transport of large equipment (aspiration system and activated air carbon filter). The Ecoinvet process used was: Transport, freight, lorry 16-32 metric ton, EURO6 {RER}| transport, freight, lorry 16-32 metric ton, EURO6 | APOS, U. An average distance of 100km was considered.
- <sup>9</sup>Transport for reagents. The Ecoinvent process used was: Transport, freight, lorry 3.5-7.5 metric ton, EURO6 {RER}| transport, freight, lorry 3.5-7.5 metric ton, EURO6 | APOS, U. An average distance of 100km was considered.
- <sup>10</sup>Transport for small laboratory equipment. The Ecoinvent process used was: Transport, freight, lorry 3.5-7.5 metric ton, EURO6 {RER}| transport, freight, lorry 3.5-7.5 metric ton, EURO6 | APOS, U. An average distance of 100 km was considered.
- <sup>11</sup>Electric energy necessary for the heating up to 100°C of the reaction mixture containing Acetone, Vanillin and Bromobutane. It is calculated using the expression  $m \cdot C_p \cdot \Delta T$ , considering the specific heat in J/kg°C for each of the substances. The Ecoinvent process used was: Electricity, low voltage {IT}| electricity voltage transformation from medium to low voltage | APOS, U.
- <sup>12</sup>Electric energy necessary to maintain the heating at 100°C of the reaction mixture for 24 hours. It is calculated using the Fourier Equation. The Ecoinvent process used was: Electricity, low voltage {IT}| electricity voltage transformation from medium to low voltage | APOS, U.
- <sup>13</sup>Electric energy necessary to eliminate the remaining solvent (ACN) using the rotavapor. It is calculated as  $H_{vap} \text{Acetone} \cdot \text{molAcetone}$ , considering  $H_{vap} \text{Acetone}$  as its latent heat of vaporization (32 kJ/mol) and  $\text{molAcetone}$  as the moles of the solvent. The Ecoinvent process used was: Electricity, low voltage {IT}| electricity voltage transformation from medium to low voltage | APOS, U.
- <sup>14</sup>Electric energy necessary to use the heating stirrer during the workup phase for 1 hour. It is calculated as  $\text{power} \cdot \text{time}$ , considering 630W as the heating stirrer power. The Ecoinvent process used was: Electricity, low voltage {IT}| electricity voltage transformation from medium to low voltage | APOS, U.
- <sup>15</sup>Electric energy necessary to use the rotavapor after the workup phase for 1 hour. It is calculated as  $\text{power} \cdot \text{time}$ , considering 500W as the rotavapor power. The Ecoinvent process used was: Electricity, low voltage {IT}| electricity voltage transformation from medium to low voltage | APOS, U.
- <sup>16</sup>Electric energy necessary to the use of the aspiration system for the whole synthesis time, i.e. 27 h. The power was calculated by considering the air flow rate of 250 m<sup>3</sup>/h, a total load loss of 110.8076 kg/m<sup>2</sup>, and an efficiency of 90%: Electricity, low voltage {IT}| electricity voltage transformation from medium to low voltage | APOS, U.
- <sup>17</sup>Amount of Acetone released into the atmosphere, as calculated by the formula reported in equation 4 of the main manuscript.
- <sup>18</sup>Amount of HBr released into the atmosphere, as calculated by the formula reported in equation 4 of the main manuscript.
- <sup>19</sup>Amount of Water released into the atmosphere, as calculated by the formula reported in equation 4 of the main manuscript.
- <sup>20</sup>Amount of Diethyl ether released into the atmosphere, as calculated by the formula reported in equation 4 of the main manuscript.
- <sup>21</sup>End of life of liquid waste, including Acetone, Diethyl ether and water. The Ecoinvent process used was: Spent solvent mixture {Europe without Switzerland}| treatment of spent solvent mixture, hazardous waste incineration, with energy recovery | APOS, U.
- <sup>22</sup>End of life of the solid waste recovered after the filtration following the first part of the synthesis. The Ecoinvent process used was: Hazardous waste, for incineration {RoW}| treatment of hazardous waste, hazardous waste incineration, with energy recovery | APOS, U.

**Table S27.** Contributions to the Life Cycle Inventory (LCI) for the synthesis of 0.46741 g of 4-butoxy-3-methoxybenzaldehyde. This is Reaction 4 (Run 14), carried in DMF as solvent with a reaction time of 16 hours, as reported in Table 1 in the main manuscript.

| Description          |                         | Amount                          | Process Data Source                                                         |
|----------------------|-------------------------|---------------------------------|-----------------------------------------------------------------------------|
| Input                | Materials               | DMF                             | Ecoinvent v 3.8 <sup>1</sup>                                                |
|                      |                         | K <sub>2</sub> CO <sub>3</sub>  | Ecoinvent v 3.8 <sup>2</sup>                                                |
|                      |                         | KCl                             | Ecoinvent v 3.8 <sup>3</sup>                                                |
|                      |                         | Bromobutane                     | Modelled from Ecoinvent v 3.8 database sub process as detailed in Table S23 |
|                      |                         | Vanillin                        | Modelled from Ecoinvent v 3.8 database sub process as detailed in Table S20 |
|                      |                         | H <sub>2</sub> O                | Ecoinvent v 3.8 <sup>4</sup>                                                |
|                      |                         | Diethyl ether                   | Ecoinvent v 3.8 <sup>5</sup>                                                |
|                      |                         | Mg <sub>2</sub> SO <sub>4</sub> | Ecoinvent v 3.8 <sup>6</sup>                                                |
|                      |                         | Silicon oil                     | Ecoinvent v 3.8 <sup>7</sup>                                                |
|                      |                         |                                 |                                                                             |
| Equipment/<br>plants | Magnetic stirrer/heater | 3.4*10 <sup>-4</sup> p          | Modelled from Ecoinvent v 3.8 database sub process as detailed in Table S18 |
|                      | Round bottom flask      | 6.25*10 <sup>-4</sup> p         | Modelled from Ecoinvent v 3.8 database sub process as detailed in Table S15 |
|                      | Separatory funnel       | 2.33*10 <sup>-5</sup> p         | Modelled from Ecoinvent v 3.8 database sub process as detailed in Table S9  |
|                      | Reflux condenser        | 3.12*10 <sup>-4</sup> p         | Modelled from Ecoinvent v 3.8 database sub process as detailed in Table S13 |
|                      | Silicon oil container   | 6.25*10 <sup>-4</sup> p         | Modelled from Ecoinvent v 3.8 database sub process as detailed in Table S6  |
|                      | Funnel                  | 2.90*10 <sup>-6</sup> p         | Modelled from Ecoinvent v 3.8 database sub process as detailed in Table S8  |
|                      | Filter                  | 3.18*10 <sup>-6</sup> p         | Modelled from Ecoinvent v 3.8 database                                      |
|                      |                         |                                 |                                                                             |

|                             |                               |                            |                                     |                                                                             |
|-----------------------------|-------------------------------|----------------------------|-------------------------------------|-----------------------------------------------------------------------------|
|                             |                               |                            | sub process as detailed in Table S7 |                                                                             |
| Fitting reflux condenser    |                               |                            | 3.12*10 <sup>-4</sup> p             | Modelled from Ecoinvent v 3.8 database sub process as detailed in Table S12 |
| Rubber tube                 |                               |                            | 5.56*10 <sup>-4</sup> p             | Modelled from Ecoinvent v 3.8 database sub process as detailed in Table S14 |
| Activated carbon air filter |                               |                            | 9.5*10 <sup>-4</sup> p              | Modelled from Ecoinvent v 3.8 database sub process as detailed in Table S4  |
| Aspiration system           |                               |                            | 2.40*10 <sup>-4</sup> p             | Modelled from Ecoinvent v 3.8 database sub process as detailed in Table S3  |
| Transport                   | Transport for large equipment | 2.29*10 <sup>-2</sup> tkm  | Ecoinvent v 3.8 <sup>8</sup>        |                                                                             |
|                             | Transport for raw materials   | 6.54 kgkm                  | Ecoinvent v 3.8 <sup>9</sup>        |                                                                             |
|                             | Transport for small equipment | 6.89*10 <sup>-2</sup> kgkm | Ecoinvent v 3.8 <sup>10</sup>       |                                                                             |
| Energy                      | Electric energy               | 42.90 kJ                   | Ecoinvent v 3.8 <sup>11</sup>       |                                                                             |
|                             |                               | 2880 Wh                    | Ecoinvent v 3.8 <sup>12</sup>       |                                                                             |
|                             |                               | 3.015 kJ                   | Ecoinvent v 3.8 <sup>13</sup>       |                                                                             |
|                             |                               | 630 Wh                     | Ecoinvent v 3.8 <sup>14</sup>       |                                                                             |
|                             |                               | 500 Wh                     | Ecoinvent v 3.8 <sup>15</sup>       |                                                                             |
|                             |                               | 1.59 kWh                   | Ecoinvent v 3.8 <sup>16</sup>       |                                                                             |
| Output                      | Air emission                  | DMF                        | 7.28*10 <sup>-7</sup> g             | SimaPro airborne emission substance list <sup>17</sup>                      |
|                             |                               | HBr                        | 5.08*10 <sup>-3</sup> g             | SimaPro airborne emission substance list <sup>18</sup>                      |
|                             |                               | H <sub>2</sub> O           | 1.15*10 <sup>-6</sup> g             | SimaPro airborne emission substance list <sup>19</sup>                      |
|                             |                               | Diethyl ether              | 5.291*10 <sup>-4</sup> g            | SimaPro airborne emission substance list <sup>20</sup>                      |
| End of life                 | Spent solvent mixture         | 31.125 g                   | Ecoinvent v 3.8 <sup>21</sup>       |                                                                             |
|                             | Incineration                  | 2.251 g                    | Ecoinvent v 3.8 <sup>22</sup>       |                                                                             |

<sup>1</sup>The Ecoinvent process used was: N,N-dimethylformamide {RER} | production | APOS, U.

- <sup>2</sup>The Ecoinvent process used was: Potassium carbonate {RER}| oxidation of manganese dioxide | APOS, U.
- <sup>3</sup>The Ecoinvent process used was: Potassium chloride {RER}| potassium chloride production | APOS, U. During the experimental work potassium iodide was used. Since it is not present in the database, potassium chloride was used as proxy.
- <sup>4</sup>The Ecoinvent process use was: Water, deionised {Europe without Switzerland}| water production, deionised | APOS, U.
- <sup>5</sup>The Ecoinvent process used was: Diethyl ether, without water, in 99.95% solution state {RER}| ethylene hydration | APOS, U.
- <sup>6</sup>The Ecoinvent process used was: Magnesium sulfate {RER}| production | APOS, U.
- <sup>7</sup>The Ecoinvent process used was: Silicone product {RER}| production | APOS, U.
- <sup>8</sup>Transport of large equipment (aspiration system and activated air carbon filter). The Ecoinvent process used was: Transport, freight, lorry 16-32 metric ton, EURO6 {RER}| transport, freight, lorry 16-32 metric ton, EURO6 | APOS, U. An average distance of 100km was considered.
- <sup>9</sup>Transport for reagents. The Ecoinvent process used was: Transport, freight, lorry 3.5-7.5 metric ton, EURO6 {RER}| transport, freight, lorry 3.5-7.5 metric ton, EURO6 | APOS, U. An average distance of 100km was considered.
- <sup>10</sup>Transport for small laboratory equipment. The Ecoinvent process used was: Transport, freight, lorry 3.5-7.5 metric ton, EURO6 {RER}| transport, freight, lorry 3.5-7.5 metric ton, EURO6 | APOS, U. An average distance of 100 km was considered.
- <sup>11</sup>Electric energy necessary for the heating up to 100°C of the reaction mixture containing DMF, Vanillin and Bromobutane. It is calculated using the expression  $m \cdot C_p \cdot DT$ , considering the specific heat in J/kg°C for each of the substances. The Ecoinvent process used was: Electricity, low voltage {IT}| electricity voltage transformation from medium to low voltage | APOS, U.
- <sup>12</sup>Electric energy necessary to maintain the heating at 100°C of the reaction mixture for 16 hours. It is calculated using the Fourier Equation. The Ecoinvent process used was: Electricity, low voltage {IT}| electricity voltage transformation from medium to low voltage | APOS, U.
- <sup>13</sup>Electric energy necessary to eliminate the remaining solvent (DMF) using the rotavapor. It is calculated as  $H_{vap}DMF \cdot molDMF$ , considering  $H_{vap}DMF$  as its latent heat of vaporization (46.7 kJ/mol) and  $molDMF$  as the moles of the solvent. The Ecoinvent process used was: Electricity, low voltage {IT}| electricity voltage transformation from medium to low voltage | APOS, U.
- <sup>14</sup>Electric energy necessary to use the heating stirrer during the workup phase for 1 hour. It is calculated as power\*time, considering 630W as the heating stirrer power. The Ecoinvent process used was: Electricity, low voltage {IT}| electricity voltage transformation from medium to low voltage | APOS, U.
- <sup>15</sup>Electric energy necessary to use the rotavapor after the workup phase for 1 hour. It is calculated as power\*time, considering 500W as the rotavapor power. The Ecoinvent process used was: Electricity, low voltage {IT}| electricity voltage transformation from medium to low voltage | APOS, U.
- <sup>16</sup>Electric energy necessary to the use of the aspiration system for the whole synthesis time, i.e. 19 h. The power was calculated by considering the air flow rate of 250 m<sup>3</sup>/h, a total load loss of 110.8076 kg/m<sup>2</sup>, and an efficiency of 90%: Electricity, low voltage {IT}| electricity voltage transformation from medium to low voltage | APOS, U.
- <sup>17</sup>Amount of DMF released into the atmosphere, as calculated by the formula reported in equation 4 of the main manuscript.
- <sup>18</sup>Amount of HBr released into the atmosphere, as calculated by the formula reported in equation 4 of the main manuscript.
- <sup>19</sup>Amount of Water released into the atmosphere, as calculated by the formula reported in equation 4 of the main manuscript.
- <sup>20</sup>Amount of Diethyl ether released into the atmosphere, as calculated by the formula reported in equation 4 of the main manuscript.
- <sup>21</sup>End of life of liquid waste, including DMF, Diethyl ether and water. The Ecoinvent process used was: Spent solvent mixture {Europe without Switzerland}| treatment of spent solvent mixture, hazardous waste incineration, with energy recovery | APOS, U.
- <sup>22</sup>End of life of the solid waste recovered after the filtration following the first part of the synthesis. The Ecoinvent process used was: Hazardous waste, for incineration {RoW}| treatment of hazardous waste, hazardous waste incineration, with energy recovery | APOS, U.

**Table S28.** Contributions to the Life Cycle Inventory (LCI) for the synthesis of 0.48177 g of 4-butoxy-3-methoxybenzaldehyde. This is Reaction 5 (Run 15), carried in DMF as solvent with a reaction time of 16 hours, as reported in Table 1 in the main manuscript.

| Description |                      | Amount                          | Process Data Source                                                         |
|-------------|----------------------|---------------------------------|-----------------------------------------------------------------------------|
| Input       | Materials            | DMF                             | Ecoinvent v 3.8 <sup>1</sup>                                                |
|             |                      | K <sub>2</sub> CO <sub>3</sub>  | Ecoinvent v 3.8 <sup>2</sup>                                                |
|             |                      | KCl                             | Ecoinvent v 3.8 <sup>3</sup>                                                |
|             |                      | Bromobutane                     | Modelled from Ecoinvent v 3.8 database sub process as detailed in Table S23 |
|             |                      | Vanillin                        | Modelled from Ecoinvent v 3.8 database sub process as detailed in Table S20 |
|             |                      | H <sub>2</sub> O                | Ecoinvent v 3.8 <sup>4</sup>                                                |
|             |                      | Diethyl ether                   | Ecoinvent v 3.8 <sup>5</sup>                                                |
|             |                      | Mg <sub>2</sub> SO <sub>4</sub> | Ecoinvent v 3.8 <sup>6</sup>                                                |
|             |                      | Silicon oil                     | Ecoinvent v 3.8 <sup>7</sup>                                                |
|             | Equipment/<br>plants | Magnetic stirrer/heater         | Modelled from Ecoinvent v 3.8 database sub process as detailed in Table S18 |
|             |                      | Round bottom flask              | Modelled from Ecoinvent v 3.8 database sub process as detailed in Table S15 |
|             |                      | Separatory funnel               | Modelled from Ecoinvent v 3.8 database sub process as detailed in Table S9  |
|             |                      | Reflux condenser                | Modelled from Ecoinvent v 3.8 database sub process as detailed in Table S13 |
|             |                      | Silicon oil container           | Modelled from Ecoinvent v 3.8 database sub process as detailed in Table S6  |
|             |                      | Funnel                          | Modelled from Ecoinvent v 3.8 database sub process as detailed in Table S8  |
|             |                      | Filter                          | Modelled from Ecoinvent v 3.8 database                                      |

|                             |                               |                            |                                     |                                                                             |
|-----------------------------|-------------------------------|----------------------------|-------------------------------------|-----------------------------------------------------------------------------|
|                             |                               |                            | sub process as detailed in Table S7 |                                                                             |
| Fitting reflux condenser    |                               |                            | 3.12*10 <sup>-4</sup> p             | Modelled from Ecoinvent v 3.8 database sub process as detailed in Table S12 |
| Rubber tube                 |                               |                            | 5.56*10 <sup>-4</sup> p             | Modelled from Ecoinvent v 3.8 database sub process as detailed in Table S14 |
| Activated carbon air filter |                               |                            | 9.5*10 <sup>-4</sup> p              | Modelled from Ecoinvent v 3.8 database sub process as detailed in Table S4  |
| Aspiration system           |                               |                            | 2.40*10 <sup>-4</sup> p             | Modelled from Ecoinvent v 3.8 database sub process as detailed in Table S3  |
| Transport                   | Transport for large equipment | 2.29*10 <sup>-2</sup> tkm  | Ecoinvent v 3.8 <sup>8</sup>        |                                                                             |
|                             | Transport for raw materials   | 6.54 kgkm                  | Ecoinvent v 3.8 <sup>9</sup>        |                                                                             |
|                             | Transport for small equipment | 1.18*10 <sup>-1</sup> kgkm | Ecoinvent v 3.8 <sup>10</sup>       |                                                                             |
| Energy                      | Electric energy               | 42.90 kJ                   | Ecoinvent v 3.8 <sup>11</sup>       |                                                                             |
|                             |                               | 2880 Wh                    | Ecoinvent v 3.8 <sup>12</sup>       |                                                                             |
|                             |                               | 3.015 kJ                   | Ecoinvent v 3.8 <sup>13</sup>       |                                                                             |
|                             |                               | 630 Wh                     | Ecoinvent v 3.8 <sup>14</sup>       |                                                                             |
|                             |                               | 500 Wh                     | Ecoinvent v 3.8 <sup>15</sup>       |                                                                             |
|                             |                               | 1.59 kWh                   | Ecoinvent v 3.8 <sup>16</sup>       |                                                                             |
| Output                      | Air emission                  | DMF                        | 7.28*10 <sup>-7</sup> g             | SimaPro airborne emission substance list <sup>17</sup>                      |
|                             |                               | HBr                        | 5.08*10 <sup>-3</sup> g             | SimaPro airborne emission substance list <sup>18</sup>                      |
|                             |                               | H <sub>2</sub> O           | 1.15*10 <sup>-6</sup> g             | SimaPro airborne emission substance list <sup>19</sup>                      |
|                             |                               | Diethyl ether              | 5.291*10 <sup>-4</sup> g            | SimaPro airborne emission substance list <sup>20</sup>                      |
| End of life                 | Spent solvent mixture         | 31.125 g                   | Ecoinvent v 3.8 <sup>21</sup>       |                                                                             |
|                             | Incineration                  | 2.251 g                    | Ecoinvent v 3.8 <sup>22</sup>       |                                                                             |

<sup>1</sup>The Ecoinvent process used was: N,N-dimethylformamide {RER} | production | APOS, U.

- <sup>2</sup>The Ecoinvent process used was: Potassium carbonate {RER}| oxidation of manganese dioxide | APOS, U.
- <sup>3</sup>The Ecoinvent process used was: Potassium chloride {RER}| potassium chloride production | APOS, U. During the experimental work potassium iodide was used. Since it is not present in the database, potassium chloride was used as proxy.
- <sup>4</sup>The Ecoinvent process use was: Water, deionised {Europe without Switzerland}| water production, deionised | APOS, U.
- <sup>5</sup>The Ecoinvent process used was: Diethyl ether, without water, in 99.95% solution state {RER}| ethylene hydration | APOS, U.
- <sup>6</sup>The Ecoinvent process used was: Magnesium sulfate {RER}| production | APOS, U.
- <sup>7</sup>The Ecoinvent process used was: Silicone product {RER}| production | APOS, U.
- <sup>8</sup>Transport of large equipment (aspiration system and activated air carbon filter). The Ecoinvent process used was: Transport, freight, lorry 16-32 metric ton, EURO6 {RER}| transport, freight, lorry 16-32 metric ton, EURO6 | APOS, U. An average distance of 100km was considered.
- <sup>9</sup>Transport for reagents. The Ecoinvent process used was: Transport, freight, lorry 3.5-7.5 metric ton, EURO6 {RER}| transport, freight, lorry 3.5-7.5 metric ton, EURO6 | APOS, U. An average distance of 100km was considered.
- <sup>10</sup>Transport for small laboratory equipment. The Ecoinvent process used was: Transport, freight, lorry 3.5-7.5 metric ton, EURO6 {RER}| transport, freight, lorry 3.5-7.5 metric ton, EURO6 | APOS, U. An average distance of 100 km was considered.
- <sup>11</sup>Electric energy necessary for the heating up to 100°C of the reaction mixture containing DMF, Vanillin and Bromobutane. It is calculated using the expression  $m \cdot C_p \cdot DT$ , considering the specific heat in J/kg°C for each of the substances. The Ecoinvent process used was: Electricity, low voltage {IT}| electricity voltage transformation from medium to low voltage | APOS, U.
- <sup>12</sup>Electric energy necessary to maintain the heating at 100°C of the reaction mixture for 16 hours. It is calculated using the Fourier Equation. The Ecoinvent process used was: Electricity, low voltage {IT}| electricity voltage transformation from medium to low voltage | APOS, U.
- <sup>13</sup>Electric energy necessary to eliminate the remaining solvent (DMF) using the rotavapor. It is calculated as  $H_{vap}DMF \cdot molDMF$ , considering  $H_{vap}DMF$  as its latent heat of vaporization (46.7 kJ/mol) and  $molDMF$  as the moles of the solvent. The Ecoinvent process used was: Electricity, low voltage {IT}| electricity voltage transformation from medium to low voltage | APOS, U.
- <sup>14</sup>Electric energy necessary to use the heating stirrer during the workup phase for 1 hour. It is calculated as power\*time, considering 630W as the heating stirrer power. The Ecoinvent process used was: Electricity, low voltage {IT}| electricity voltage transformation from medium to low voltage | APOS, U.
- <sup>15</sup>Electric energy necessary to use the rotavapor after the workup phase for 1 hour. It is calculated as power\*time, considering 500W as the rotavapor power. The Ecoinvent process used was: Electricity, low voltage {IT}| electricity voltage transformation from medium to low voltage | APOS, U.
- <sup>16</sup>Electric energy necessary to the use of the aspiration system for the whole synthesis time, i.e. 19 h. The power was calculated by considering the air flow rate of 250 m<sup>3</sup>/h, a total load loss of 110.8076 kg/m<sup>2</sup>, and an efficiency of 90%: Electricity, low voltage {IT}| electricity voltage transformation from medium to low voltage | APOS, U.
- <sup>17</sup>Amount of DMF released into the atmosphere, as calculated by the formula reported in equation 4 of the main manuscript.
- <sup>18</sup>Amount of HBr released into the atmosphere, as calculated by the formula reported in equation 4 of the main manuscript.
- <sup>19</sup>Amount of Water released into the atmosphere, as calculated by the formula reported in equation 4 of the main manuscript.
- <sup>20</sup>Amount of Diethyl ether released into the atmosphere, as calculated by the formula reported in equation 4 of the main manuscript.
- <sup>21</sup>End of life of liquid waste, including DMF, Diethyl ether and water. The Ecoinvent process used was: Spent solvent mixture {Europe without Switzerland}| treatment of spent solvent mixture, hazardous waste incineration, with energy recovery | APOS, U.
- <sup>22</sup>End of life of the solid waste recovered after the filtration following the first part of the synthesis. The Ecoinvent process used was: Hazardous waste, for incineration {RoW}| treatment of hazardous waste, hazardous waste incineration, with energy recovery | APOS, U.



**Table S29.** Contributions to the Life Cycle Inventory (LCI) for the synthesis of 0.14067 g of 4-butoxy-3-methoxybenzaldehyde. This is Reaction 6 (Run 1), carried in Acetone as solvent with a reaction time of 8 hours, as reported in Table 1 in the main manuscript.

| Description           |                      |                                 | Amount                                                                      | Process Data Source                                                         |
|-----------------------|----------------------|---------------------------------|-----------------------------------------------------------------------------|-----------------------------------------------------------------------------|
| Input                 | Materials            | Acetone                         | 15.68 g                                                                     | Ecoinvent v 3.8 <sup>1</sup>                                                |
|                       |                      | K <sub>2</sub> CO <sub>3</sub>  | 0.459 g                                                                     | Ecoinvent v 3.8 <sup>2</sup>                                                |
|                       |                      | KCl                             | 0 g                                                                         | Ecoinvent v 3.8 <sup>3</sup>                                                |
|                       |                      | Bromobutane                     | 0.922 g                                                                     | Modelled from Ecoinvent v 3.8 database sub process as detailed in Table S23 |
|                       |                      | Vanillin                        | 0.5056 g                                                                    | Modelled from Ecoinvent v 3.8 database sub process as detailed in Table S20 |
|                       |                      | H <sub>2</sub> O                | 5 g                                                                         | Ecoinvent v 3.8 <sup>4</sup>                                                |
|                       |                      | Diethyl ether                   | 21.405 g                                                                    | Ecoinvent v 3.8 <sup>5</sup>                                                |
|                       |                      | Mg <sub>2</sub> SO <sub>4</sub> | 1 g                                                                         | Ecoinvent v 3.8 <sup>6</sup>                                                |
|                       |                      | Silicon oil                     | 1.72*10 <sup>-2</sup> p                                                     | Ecoinvent v 3.8 <sup>7</sup>                                                |
|                       | Equipment/<br>plants | Magnetic stirrer/heater         | 1.8*10 <sup>-4</sup> p                                                      | Modelled from Ecoinvent v 3.8 database sub process as detailed in Table S18 |
| Round bottom flask    |                      | 3.82*10 <sup>-4</sup> p         | Modelled from Ecoinvent v 3.8 database sub process as detailed in Table S15 |                                                                             |
| Separatory funnel     |                      | 2.33*10 <sup>-5</sup> p         | Modelled from Ecoinvent v 3.8 database sub process as detailed in Table S9  |                                                                             |
| Reflux condenser      |                      | 3.12*10 <sup>-4</sup> p         | Modelled from Ecoinvent v 3.8 database sub process as detailed in Table S13 |                                                                             |
| Silicon oil container |                      | 3.82*10 <sup>-4</sup> p         | Modelled from Ecoinvent v 3.8 database sub process as detailed in Table S6  |                                                                             |
| Funnel                |                      | 2.90*10 <sup>-6</sup> p         | Modelled from Ecoinvent v 3.8 database sub process as detailed in Table S8  |                                                                             |
|                       | Filter               | 3.18*10 <sup>-6</sup> p         | Modelled from Ecoinvent v 3.8 database                                      |                                                                             |

|             |                               |                            |                                                                             |                                                        |
|-------------|-------------------------------|----------------------------|-----------------------------------------------------------------------------|--------------------------------------------------------|
|             |                               |                            | sub process as detailed in Table S7                                         |                                                        |
|             | Fitting reflux condenser      | 8.69*10 <sup>-4</sup> p    | Modelled from Ecoinvent v 3.8 database sub process as detailed in Table S12 |                                                        |
|             | Rubber tube                   | 1.67*10 <sup>-3</sup> p    | Modelled from Ecoinvent v 3.8 database sub process as detailed in Table S14 |                                                        |
|             | Activated carbon air filter   | 5.5*10 <sup>-4</sup> p     | Modelled from Ecoinvent v 3.8 database sub process as detailed in Table S4  |                                                        |
|             | Aspiration system             | 1.38*10 <sup>-4</sup> p    | Modelled from Ecoinvent v 3.8 database sub process as detailed in Table S3  |                                                        |
| Transport   | Transport for large equipment | 2.29*10 <sup>-2</sup> tkm  | Ecoinvent v 3.8 <sup>8</sup>                                                |                                                        |
|             | Transport for raw materials   | 8.50 kgkm                  | Ecoinvent v 3.8 <sup>9</sup>                                                |                                                        |
|             | Transport for small equipment | 6.95*10 <sup>-2</sup> kgkm | Ecoinvent v 3.8 <sup>10</sup>                                               |                                                        |
| Energy      | Electric energy               | 11.40 kJ                   | Ecoinvent v 3.8 <sup>11</sup>                                               |                                                        |
|             |                               | 480 Wh                     | Ecoinvent v 3.8 <sup>12</sup>                                               |                                                        |
|             |                               | 8.64 kJ                    | Ecoinvent v 3.8 <sup>13</sup>                                               |                                                        |
|             |                               | 630 Wh                     | Ecoinvent v 3.8 <sup>14</sup>                                               |                                                        |
|             |                               | 500 Wh                     | Ecoinvent v 3.8 <sup>15</sup>                                               |                                                        |
|             |                               | 0.92 kWh                   | Ecoinvent v 3.8 <sup>16</sup>                                               |                                                        |
| Output      | Air emission                  | Acetone                    | 1.44*10 <sup>-4</sup> g                                                     | SimaPro airborne emission substance list <sup>17</sup> |
|             |                               | HBr                        | 2.80*10 <sup>-3</sup> g                                                     | SimaPro airborne emission substance list <sup>18</sup> |
|             |                               | H <sub>2</sub> O           | 1.15*10 <sup>-6</sup> g                                                     | SimaPro airborne emission substance list <sup>19</sup> |
|             |                               | Diethyl ether              | 5.29*10 <sup>-4</sup> g                                                     | SimaPro airborne emission substance list <sup>20</sup> |
| End of life | Spent solvent mixture         | 42.085 g                   | Ecoinvent v 3.8 <sup>21</sup>                                               |                                                        |
|             | Incineration                  | 1.459 g                    | Ecoinvent v 3.8 <sup>22</sup>                                               |                                                        |

<sup>1</sup>The Ecoinvent process used was: Acetone, liquid {RER}| production | APOS, U

- <sup>2</sup>The Ecoinvent process used was: Potassium carbonate {RER}| oxidation of manganese dioxide | APOS, U.
- <sup>3</sup>The Ecoinvent process used was: Potassium chloride {RER}| potassium chloride production | APOS, U. During the experimental work potassium iodide was used. Since it is not present in the database, potassium chloride was used as proxy. In this specific run, this reagent was not used, for this reason its quantity is zero in this table.
- <sup>4</sup>The Ecoinvent process used was: Water, deionised {Europe without Switzerland}| water production, deionised | APOS, U.
- <sup>5</sup>The Ecoinvent process used was: Diethyl ether, without water, in 99.95% solution state {RER}| ethylene hydration | APOS, U.
- <sup>6</sup>The Ecoinvent process used was: Magnesium sulfate {RER}| production | APOS, U.
- <sup>7</sup>The Ecoinvent process used was: Silicone product {RER}| production | APOS, U.
- <sup>8</sup>Transport of large equipment (aspiration system and activated air carbon filter). The Ecoinvent process used was: Transport, freight, lorry 16-32 metric ton, EURO6 {RER}| transport, freight, lorry 16-32 metric ton, EURO6 | APOS, U. An average distance of 100km was considered.
- <sup>9</sup>Transport for reagents. The Ecoinvent process used was: Transport, freight, lorry 3.5-7.5 metric ton, EURO6 {RER}| transport, freight, lorry 3.5-7.5 metric ton, EURO6 | APOS, U. An average distance of 100km was considered.
- <sup>10</sup>Transport for small laboratory equipment. The Ecoinvent process used was: Transport, freight, lorry 3.5-7.5 metric ton, EURO6 {RER}| transport, freight, lorry 3.5-7.5 metric ton, EURO6 | APOS, U. An average distance of 100 km was considered.
- <sup>11</sup>Electric energy necessary for the heating up to 100°C of the reaction mixture containing Acetone, Vanillin and Bromobutane. It is calculated using the expression  $m \cdot C_p \cdot \Delta T$ , considering the specific heat in J/kg°C for each of the substances. The Ecoinvent process used was: Electricity, low voltage {IT}| electricity voltage transformation from medium to low voltage | APOS, U.
- <sup>12</sup>Electric energy necessary to maintain the heating at 100°C of the reaction mixture for 8 hours. It is calculated using the Fourier Equation. The Ecoinvent process used was: Electricity, low voltage {IT}| electricity voltage transformation from medium to low voltage | APOS, U.
- <sup>13</sup>Electric energy necessary to eliminate the remaining solvent (ACN) using the rotavapor. It is calculated as  $H_{vap} \cdot n_{Acetone}$ , considering  $H_{vap}$  as its latent heat of vaporization (32 kJ/mol) and  $n_{Acetone}$  as the moles of the solvent. The Ecoinvent process used was: Electricity, low voltage {IT}| electricity voltage transformation from medium to low voltage | APOS, U.
- <sup>14</sup>Electric energy necessary to use the heating stirrer during the workup phase for 1 hour. It is calculated as  $power \cdot time$ , considering 630W as the heating stirrer power. The Ecoinvent process used was: Electricity, low voltage {IT}| electricity voltage transformation from medium to low voltage | APOS, U.
- <sup>15</sup>Electric energy necessary to use the rotavapor after the workup phase for 1 hour. It is calculated as  $power \cdot time$ , considering 500W as the rotavapor power. The Ecoinvent process used was: Electricity, low voltage {IT}| electricity voltage transformation from medium to low voltage | APOS, U.
- <sup>16</sup>Electric energy necessary to the use of the aspiration system for the whole synthesis time, i.e. 11 h. The power was calculated by considering the air flow rate of 250 m<sup>3</sup>/h, a total load loss of 110.8076 kg/m<sup>2</sup>, and an efficiency of 90%: Electricity, low voltage {IT}| electricity voltage transformation from medium to low voltage | APOS, U.
- <sup>17</sup>Amount of Acetone released into the atmosphere, as calculated by the formula reported in equation 4 of the main manuscript.
- <sup>18</sup>Amount of HBr released into the atmosphere, as calculated by the formula reported in equation 4 of the main manuscript.
- <sup>19</sup>Amount of Water released into the atmosphere, as calculated by the formula reported in equation 4 of the main manuscript.
- <sup>20</sup>Amount of Diethyl ether released into the atmosphere, as calculated by the formula reported in equation 4 of the main manuscript.
- <sup>21</sup>End of life of liquid waste, including Acetone, Diethyl ether and water. The Ecoinvent process used was: Spent solvent mixture {Europe without Switzerland}| treatment of spent solvent mixture, hazardous waste incineration, with energy recovery | APOS, U.
- <sup>22</sup>End of life of the solid waste recovered after the filtration following the first part of the synthesis. The Ecoinvent process used was: Hazardous waste, for incineration {RoW}| treatment of hazardous waste, hazardous waste incineration, with energy recovery | APOS, U.

**Table S30.** Contributions to the Life Cycle Inventory (LCI) for the synthesis of 0.25348 g of 4-butoxy-3-methoxybenzaldehyde. This is Reaction 7 (Run 16), carried in Acetone as solvent with a reaction time of 16 hours, as reported in Table 1 in the main manuscript.

| Description |                      |                                 | Amount                  | Process Data Source                                                         |
|-------------|----------------------|---------------------------------|-------------------------|-----------------------------------------------------------------------------|
| Input       | Materials            | Acetone                         | 15.68 g                 | Ecoinvent v 3.8 <sup>1</sup>                                                |
|             |                      | K <sub>2</sub> CO <sub>3</sub>  | 0.729 g                 | Ecoinvent v 3.8 <sup>2</sup>                                                |
|             |                      | KCl                             | 0.526 g                 | Ecoinvent v 3.8 <sup>3</sup>                                                |
|             |                      | Bromobutane                     | 0.699 g                 | Modelled from Ecoinvent v 3.8 database sub process as detailed in Table S23 |
|             |                      | Vanillin                        | 0.504 g                 | Modelled from Ecoinvent v 3.8 database sub process as detailed in Table S20 |
|             |                      | H <sub>2</sub> O                | 5 g                     | Ecoinvent v 3.8 <sup>4</sup>                                                |
|             |                      | Diethyl ether                   | 21.405 g                | Ecoinvent v 3.8 <sup>5</sup>                                                |
|             |                      | Mg <sub>2</sub> SO <sub>4</sub> | 1 g                     | Ecoinvent v 3.8 <sup>6</sup>                                                |
|             |                      | Silicon oil                     | 1.72*10 <sup>-2</sup> p | Ecoinvent v 3.8 <sup>7</sup>                                                |
|             | Equipment/<br>plants | Magnetic stirrer/heater         | 3.6*10 <sup>-4</sup> p  | Modelled from Ecoinvent v 3.8 database sub process as detailed in Table S18 |
|             |                      | Round bottom flask              | 6.25*10 <sup>-4</sup> p | Modelled from Ecoinvent v 3.8 database sub process as detailed in Table S15 |
|             |                      | Separatory funnel               | 2.33*10 <sup>-5</sup> p | Modelled from Ecoinvent v 3.8 database sub process as detailed in Table S9  |
|             |                      | Reflux condenser                | 5.90*10 <sup>-4</sup> p | Modelled from Ecoinvent v 3.8 database sub process as detailed in Table S13 |
|             |                      | Silicon oil container           | 6.25*10 <sup>-4</sup> p | Modelled from Ecoinvent v 3.8 database sub process as detailed in Table S6  |
|             |                      | Funnel                          | 2.90*10 <sup>-6</sup> p | Modelled from Ecoinvent v 3.8 database sub process as detailed in Table S8  |
|             |                      | Filter                          | 3.18*10 <sup>-6</sup> p | Modelled from Ecoinvent v 3.8 database                                      |
|             |                      |                                 |                         |                                                                             |

|                             |                               |                            |                                                                                                        |
|-----------------------------|-------------------------------|----------------------------|--------------------------------------------------------------------------------------------------------|
|                             |                               |                            | sub process as detailed in Table S7                                                                    |
| Fitting reflux condenser    |                               |                            | 5.90*10 <sup>-4</sup> p<br>Modelled from Ecoinvent v 3.8 database sub process as detailed in Table S12 |
| Rubber tube                 |                               |                            | 1.11*10 <sup>-3</sup> p<br>Modelled from Ecoinvent v 3.8 database sub process as detailed in Table S14 |
| Activated carbon air filter |                               |                            | 9.5*10 <sup>-4</sup> p<br>Modelled from Ecoinvent v 3.8 database sub process as detailed in Table S4   |
| Aspiration system           |                               |                            | 2.38*10 <sup>-4</sup> p<br>Modelled from Ecoinvent v 3.8 database sub process as detailed in Table S3  |
| Transport                   | Transport for large equipment | 3.96*10 <sup>-2</sup> tkm  | Ecoinvent v 3.8 <sup>8</sup>                                                                           |
|                             | Transport for raw materials   | 8.61 kgkm                  | Ecoinvent v 3.8 <sup>9</sup>                                                                           |
|                             | Transport for small equipment | 1.36*10 <sup>-1</sup> kgkm | Ecoinvent v 3.8 <sup>10</sup>                                                                          |
| Energy                      | Electric energy               | 11.40 kJ                   | Ecoinvent v 3.8 <sup>11</sup>                                                                          |
|                             |                               | 960 Wh                     | Ecoinvent v 3.8 <sup>12</sup>                                                                          |
|                             |                               | 8.64 kJ                    | Ecoinvent v 3.8 <sup>13</sup>                                                                          |
|                             |                               | 630 Wh                     | Ecoinvent v 3.8 <sup>14</sup>                                                                          |
|                             |                               | 500 Wh                     | Ecoinvent v 3.8 <sup>15</sup>                                                                          |
|                             |                               | 1.59 kWh                   | Ecoinvent v 3.8 <sup>16</sup>                                                                          |
| Output                      | Air emission                  | Acetone                    | 1.44*10 <sup>-4</sup> g<br>SimaPro airborne emission substance list <sup>17</sup>                      |
|                             |                               | HBr                        | 4.04*10 <sup>-3</sup> g<br>SimaPro airborne emission substance list <sup>18</sup>                      |
|                             |                               | H <sub>2</sub> O           | 1.15*10 <sup>-6</sup> g<br>SimaPro airborne emission substance list <sup>19</sup>                      |
|                             |                               | Diethyl ether              | 5.29*10 <sup>-4</sup> g<br>SimaPro airborne emission substance list <sup>20</sup>                      |
| End of life                 | Spent solvent mixture         | 42.085 g                   | Ecoinvent v 3.8 <sup>21</sup>                                                                          |
|                             | Incineration                  | 2.255 g                    | Ecoinvent v 3.8 <sup>22</sup>                                                                          |

<sup>1</sup>The Ecoinvent process used was: Acetone, liquid {RER}| production | APOS, U

- <sup>2</sup>The Ecoinvent process used was: Potassium carbonate {RER}| oxidation of manganese dioxide | APOS, U.
- <sup>3</sup>The Ecoinvent process used was: Potassium chloride {RER}| potassium chloride production | APOS, U. During the experimental work potassium iodide was used. Since it is not present in the database, potassium chloride was used as proxy.
- <sup>4</sup>The Ecoinvent process use was: Water, deionised {Europe without Switzerland}| water production, deionised | APOS, U.
- <sup>5</sup>The Ecoinvent process used was: Diethyl ether, without water, in 99.95% solution state {RER}| ethylene hydration | APOS, U.
- <sup>6</sup>The Ecoinvent process used was: Magnesium sulfate {RER}| production | APOS, U.
- <sup>7</sup>The Ecoinvent process used was: Silicone product {RER}| production | APOS, U.
- <sup>8</sup>Transport of large equipment (aspiration system and activated air carbon filter). The Ecoinvet process used was: Transport, freight, lorry 16-32 metric ton, EURO6 {RER}| transport, freight, lorry 16-32 metric ton, EURO6 | APOS, U. An average distance of 100km was considered.
- <sup>9</sup>Transport for reagents. The Ecoinvent process used was: Transport, freight, lorry 3.5-7.5 metric ton, EURO6 {RER}| transport, freight, lorry 3.5-7.5 metric ton, EURO6 | APOS, U. An average distance of 100km was considered.
- <sup>10</sup>Transport for small laboratory equipment. The Ecoinvent process used was: Transport, freight, lorry 3.5-7.5 metric ton, EURO6 {RER}| transport, freight, lorry 3.5-7.5 metric ton, EURO6 | APOS, U. An average distance of 100 km was considered.
- <sup>11</sup>Electric energy necessary for the heating up to 100°C of the reaction mixture containing Acetone, Vanillin and Bromobutane. It is calculated using the expression  $m \cdot C_p \cdot \Delta T$ , considering the specific heat in J/kg°C for each of the substances. The Ecoinvent process used was: Electricity, low voltage {IT}| electricity voltage transformation from medium to low voltage | APOS, U.
- <sup>12</sup>Electric energy necessary to maintain the heating at 100°C of the reaction mixture for 16 hours. It is calculated using the Fourier Equation. The Ecoinvent process used was: Electricity, low voltage {IT}| electricity voltage transformation from medium to low voltage | APOS, U.
- <sup>13</sup>Electric energy necessary to eliminate the remaining solvent (Acetone) using the rotavapor. It is calculated as  $H_{vap} \text{Acetone} \cdot \text{molAcetone}$ , considering  $H_{vap} \text{Acetone}$  as its latent heat of vaporization (32 kJ/mol) and  $\text{molAcetone}$  as the moles of the solvent. The Ecoinvent process used was: Electricity, low voltage {IT}| electricity voltage transformation from medium to low voltage | APOS, U.
- <sup>14</sup>Electric energy necessary to use the heating stirrer during the workup phase for 1 hour. It is calculated as  $\text{power} \cdot \text{time}$ , considering 630W as the heating stirrer power. The Ecoinvent process used was: Electricity, low voltage {IT}| electricity voltage transformation from medium to low voltage | APOS, U.
- <sup>15</sup>Electric energy necessary to use the rotavapor after the workup phase for 1 hour. It is calculated as  $\text{power} \cdot \text{time}$ , considering 500W as the rotavapor power. The Ecoinvent process used was: Electricity, low voltage {IT}| electricity voltage transformation from medium to low voltage | APOS, U.
- <sup>16</sup>Electric energy necessary to the use of the aspiration system for the whole synthesis time, i.e. 19 h. The power was calculated by considering the air flow rate of 250 m<sup>3</sup>/h, a total load loss of 110.8076 kg/m<sup>2</sup>, and an efficiency of 90%: Electricity, low voltage {IT}| electricity voltage transformation from medium to low voltage | APOS, U.
- <sup>17</sup>Amount of Acetone released into the atmosphere, as calculated by the formula reported in equation 4 of the main manuscript.
- <sup>18</sup>Amount of HBr released into the atmosphere, as calculated by the formula reported in equation 4 of the main manuscript.
- <sup>19</sup>Amount of Water released into the atmosphere, as calculated by the formula reported in equation 4 of the main manuscript.
- <sup>20</sup>Amount of Diethyl ether released into the atmosphere, as calculated by the formula reported in equation 4 of the main manuscript.
- <sup>21</sup>End of life of liquid waste, including Acetone, Diethyl ether and water. The Ecoinvent process used was: Spent solvent mixture {Europe without Switzerland}| treatment of spent solvent mixture, hazardous waste incineration, with energy recovery | APOS, U.
- <sup>22</sup>End of life of the solid waste recovered after the filtration following the first part of the synthesis. The Ecoinvent process used was: Hazardous waste, for incineration {RoW}| treatment of hazardous waste, hazardous waste incineration, with energy recovery | APOS, U.

**Table S31.** Contributions to the Life Cycle Inventory (LCI) for the synthesis of 0.23202 g of 4-butoxy-3-methoxybenzaldehyde. This is Reaction 8 (Run 17), carried in Acetone as solvent with a reaction time of 16 hours, as reported in Table 1 in the main manuscript.

| Description |                      |                                 | Amount                  | Process Data Source                                                         |
|-------------|----------------------|---------------------------------|-------------------------|-----------------------------------------------------------------------------|
| Input       | Materials            | Acetone                         | 15.68 g                 | Ecoinvent v 3.8 <sup>1</sup>                                                |
|             |                      | K <sub>2</sub> CO <sub>3</sub>  | 0.744 g                 | Ecoinvent v 3.8 <sup>2</sup>                                                |
|             |                      | KCl                             | 0.556 g                 | Ecoinvent v 3.8 <sup>3</sup>                                                |
|             |                      | Bromobutane                     | 0.693 g                 | Modelled from Ecoinvent v 3.8 database sub process as detailed in Table S23 |
|             |                      | Vanillin                        | 0.509 g                 | Modelled from Ecoinvent v 3.8 database sub process as detailed in Table S20 |
|             |                      | H <sub>2</sub> O                | 5 g                     | Ecoinvent v 3.8 <sup>4</sup>                                                |
|             |                      | Diethyl ether                   | 21.405 g                | Ecoinvent v 3.8 <sup>5</sup>                                                |
|             |                      | Mg <sub>2</sub> SO <sub>4</sub> | 1 g                     | Ecoinvent v 3.8 <sup>6</sup>                                                |
|             |                      | Silicon oil                     | 1.72*10 <sup>-2</sup> p | Ecoinvent v 3.8 <sup>7</sup>                                                |
|             | Equipment/<br>plants | Magnetic stirrer/heater         | 3.6*10 <sup>-4</sup> p  | Modelled from Ecoinvent v 3.8 database sub process as detailed in Table S18 |
|             |                      | Round bottom flask              | 6.25*10 <sup>-4</sup> p | Modelled from Ecoinvent v 3.8 database sub process as detailed in Table S15 |
|             |                      | Separatory funnel               | 2.33*10 <sup>-5</sup> p | Modelled from Ecoinvent v 3.8 database sub process as detailed in Table S9  |
|             |                      | Reflux condenser                | 5.90*10 <sup>-4</sup> p | Modelled from Ecoinvent v 3.8 database sub process as detailed in Table S13 |
|             |                      | Silicon oil container           | 6.25*10 <sup>-4</sup> p | Modelled from Ecoinvent v 3.8 database sub process as detailed in Table S6  |
|             |                      | Funnel                          | 2.90*10 <sup>-6</sup> p | Modelled from Ecoinvent v 3.8 database sub process as detailed in Table S8  |
|             |                      |                                 |                         |                                                                             |

|           |              |                               |                           |                                                                             |
|-----------|--------------|-------------------------------|---------------------------|-----------------------------------------------------------------------------|
|           |              | Filter                        | $3.18 \cdot 10^{-6}$ p    | Modelled from Ecoinvent v 3.8 database sub process as detailed in Table S7  |
|           |              | Fitting reflux condenser      | $5.90 \cdot 10^{-4}$ p    | Modelled from Ecoinvent v 3.8 database sub process as detailed in Table S12 |
|           |              | Rubber tube                   | $1.11 \cdot 10^{-3}$ p    | Modelled from Ecoinvent v 3.8 database sub process as detailed in Table S14 |
|           |              | Activated carbon air filter   | $9.5 \cdot 10^{-4}$ p     | Modelled from Ecoinvent v 3.8 database sub process as detailed in Table S4  |
|           |              | Aspiration system             | $2.38 \cdot 10^{-4}$ p    | Modelled from Ecoinvent v 3.8 database sub process as detailed in Table S3  |
| Transport |              | Transport for large equipment | $3.96 \cdot 10^{-2}$ tkm  | Ecoinvent v 3.8 <sup>8</sup>                                                |
|           |              | Transport for raw materials   | 8.61 kgkm                 | Ecoinvent v 3.8 <sup>9</sup>                                                |
|           |              | Transport for small equipment | $1.36 \cdot 10^{-1}$ kgkm | Ecoinvent v 3.8 <sup>10</sup>                                               |
| Energy    |              | Electric energy               | 11.40 kJ                  | Ecoinvent v 3.8 <sup>11</sup>                                               |
|           |              |                               | 960 Wh                    | Ecoinvent v 3.8 <sup>12</sup>                                               |
|           |              |                               | 8.64 kJ                   | Ecoinvent v 3.8 <sup>13</sup>                                               |
|           |              |                               | 630 Wh                    | Ecoinvent v 3.8 <sup>14</sup>                                               |
|           |              |                               | 500 Wh                    | Ecoinvent v 3.8 <sup>15</sup>                                               |
|           |              |                               | 1.59 kWh                  | Ecoinvent v 3.8 <sup>16</sup>                                               |
| Output    | Air emission | Acetone                       | $1.44 \cdot 10^{-4}$ g    | SimaPro airborne emission substance list <sup>17</sup>                      |
|           |              | HBr                           | $3.58 \cdot 10^{-3}$ g    | SimaPro airborne emission substance list <sup>18</sup>                      |
|           |              | H <sub>2</sub> O              | $1.15 \cdot 10^{-6}$ g    | SimaPro airborne emission substance list <sup>19</sup>                      |
|           |              | Diethyl ether                 | $5.29 \cdot 10^{-4}$ g    | SimaPro airborne emission substance list <sup>20</sup>                      |
|           | End of life  | Spent solvent mixture         | 42.085 g                  | Ecoinvent v 3.8 <sup>21</sup>                                               |



| Incineration                                                                                                                                                                                                                                                                                                                                                                                                                        | 2.300 g | Ecoinvent v 3.8 <sup>22</sup> |
|-------------------------------------------------------------------------------------------------------------------------------------------------------------------------------------------------------------------------------------------------------------------------------------------------------------------------------------------------------------------------------------------------------------------------------------|---------|-------------------------------|
| <sup>1</sup> The Ecoinvent process used was: Acetone, liquid {RER}  production   APOS, U                                                                                                                                                                                                                                                                                                                                            |         |                               |
| <sup>2</sup> The Ecoinvent process used was: Potassium carbonate {RER}  oxidation of manganese dioxide   APOS, U.                                                                                                                                                                                                                                                                                                                   |         |                               |
| <sup>3</sup> The Ecoinvent process used was: Potassium chloride {RER}  potassium chloride production   APOS, U. During the experimental work potassium iodide was used. Since it is not present in the database, potassium chloride was used as proxy.                                                                                                                                                                              |         |                               |
| <sup>4</sup> The Ecoinvent process use was: Water, deionised {Europe without Switzerland}  water production, deionised   APOS, U.                                                                                                                                                                                                                                                                                                   |         |                               |
| <sup>5</sup> The Ecoinvent process used was: Diethyl ether, without water, in 99.95% solution state {RER}  ethylene hydration   APOS, U.                                                                                                                                                                                                                                                                                            |         |                               |
| <sup>6</sup> The Ecoinvent process used was: Magnesium sulfate {RER}  production   APOS, U.                                                                                                                                                                                                                                                                                                                                         |         |                               |
| <sup>7</sup> The Ecoinvent process used was: Silicone product {RER}  production   APOS, U.                                                                                                                                                                                                                                                                                                                                          |         |                               |
| <sup>8</sup> Transport of large equipment (aspiration system and activated air carbon filter). The Ecoinvent process used was: Transport, freight, lorry 16-32 metric ton, EURO6 {RER}  transport, freight, lorry 16-32 metric ton, EURO6   APOS, U. An average distance of 100km was considered.                                                                                                                                   |         |                               |
| <sup>9</sup> Transport for reagents. The Ecoinvent process used was: Transport, freight, lorry 3.5-7.5 metric ton, EURO6 {RER}  transport, freight, lorry 3.5-7.5 metric ton, EURO6   APOS, U. An average distance of 100km was considered.                                                                                                                                                                                         |         |                               |
| <sup>10</sup> Transport for small laboratory equipment. The Ecoinvent process used was: Transport, freight, lorry 3.5-7.5 metric ton, EURO6 {RER}  transport, freight, lorry 3.5-7.5 metric ton, EURO6   APOS, U. An average distance of 100 km was considered.                                                                                                                                                                     |         |                               |
| <sup>11</sup> Electric energy necessary for the heating up to 100°C of the reaction mixture containing Acetone, Vanillin and Bromobutane. It is calculated using the expression $m \cdot C_p \cdot DT$ , considering the specific heat in J/kg°C for each of the substances. The Ecoinvent process used was: Electricity, low voltage {IT}  electricity voltage transformation from medium to low voltage   APOS, U.                |         |                               |
| <sup>12</sup> Electric energy necessary to maintain the heating at 100°C of the reaction mixture for 16 hours. It is calculated using the Fourier Equation. The Ecoinvent process used was: Electricity, low voltage {IT}  electricity voltage transformation from medium to low voltage   APOS, U.                                                                                                                                 |         |                               |
| <sup>13</sup> Electric energy necessary to eliminate the remaining solvent (Acetone) using the rotavapor. It is calculated as $H_{vap}Acetone \cdot molAcetone$ , considering $H_{vap}Acetone$ as its latent heat of vaporization (32 kJ/mol) and $molAcetone$ as the moles of the solvent. The Ecoinvent process used was: Electricity, low voltage {IT}  electricity voltage transformation from medium to low voltage   APOS, U. |         |                               |
| <sup>14</sup> Electric energy necessary to use the heating stirrer during the workup phase for 1 hour. It is calculated as $power \cdot time$ , considering 630W as the heating stirrer power. The Ecoinvent process used was: Electricity, low voltage {IT}  electricity voltage transformation from medium to low voltage   APOS, U.                                                                                              |         |                               |
| <sup>15</sup> Electric energy necessary to use the rotavapor after the workup phase for 1 hour. It is calculated as $power \cdot time$ , considering 500W as the rotavapor power. The Ecoinvent process used was: Electricity, low voltage {IT}  electricity voltage transformation from medium to low voltage   APOS, U.                                                                                                           |         |                               |
| <sup>16</sup> Electric energy necessary to the use of the aspiration system for the whole synthesis time, i.e. 19 h. The power was calculated by considering the air flow rate of 250 m <sup>3</sup> /h, a total load loss of 110.8076 kg/m <sup>2</sup> , and an efficiency of 90%: Electricity, low voltage {IT}  electricity voltage transformation from medium to low voltage   APOS, U.                                        |         |                               |
| <sup>17</sup> Amount of Acetone released into the atmosphere, as calculated by the formula reported in equation 4 of the main manuscript.                                                                                                                                                                                                                                                                                           |         |                               |
| <sup>18</sup> Amount of HBr released into the atmosphere, as calculated by the formula reported in equation 4 of the main manuscript.                                                                                                                                                                                                                                                                                               |         |                               |
| <sup>19</sup> Amount of Water released into the atmosphere, as calculated by the formula reported in equation 4 of the main manuscript.                                                                                                                                                                                                                                                                                             |         |                               |
| <sup>20</sup> Amount of Diethyl ether released into the atmosphere, as calculated by the formula reported in equation 4 of the main manuscript.                                                                                                                                                                                                                                                                                     |         |                               |
| <sup>21</sup> End of life of liquid waste, including Acetone, Diethyl ether and water. The Ecoinvent process used was: Spent solvent mixture {Europe without Switzerland}  treatment of spent solvent mixture, hazardous waste incineration, with energy recovery   APOS, U.                                                                                                                                                        |         |                               |
| <sup>22</sup> End of life of the solid waste recovered after the filtration following the first part of the synthesis. The Ecoinvent process used was: Hazardous waste, for incineration {RoW}  treatment of hazardous waste, hazardous waste incineration, with energy recovery   APOS, U.                                                                                                                                         |         |                               |

**Table S32.** Contributions to the Life Cycle Inventory (LCI) for the synthesis of 0.34083 g of 4-butoxy-3-methoxybenzaldehyde. This is Reaction 9 (Run 12), carried in DMF as solvent with a reaction time of 24 hours, as reported in Table 1 in the main manuscript.

| Description          |                         | Amount                          | Process Data Source                                                         |
|----------------------|-------------------------|---------------------------------|-----------------------------------------------------------------------------|
| Input                | Materials               | DMF                             | Ecoinvent v 3.8 <sup>1</sup>                                                |
|                      |                         | K <sub>2</sub> CO <sub>3</sub>  | Ecoinvent v 3.8 <sup>2</sup>                                                |
|                      |                         | KCl                             | Ecoinvent v 3.8 <sup>3</sup>                                                |
|                      |                         | Bromobutane                     | Modelled from Ecoinvent v 3.8 database sub process as detailed in Table S23 |
|                      |                         | Vanillin                        | Modelled from Ecoinvent v 3.8 database sub process as detailed in Table S20 |
|                      |                         | H <sub>2</sub> O                | Ecoinvent v 3.8 <sup>4</sup>                                                |
|                      |                         | Diethyl ether                   | Ecoinvent v 3.8 <sup>5</sup>                                                |
|                      |                         | Mg <sub>2</sub> SO <sub>4</sub> | Ecoinvent v 3.8 <sup>6</sup>                                                |
|                      |                         | Silicon oil                     | Ecoinvent v 3.8 <sup>7</sup>                                                |
|                      |                         |                                 |                                                                             |
| Equipment/<br>plants | Magnetic stirrer/heater | 1.8*10 <sup>-4</sup> p          | Modelled from Ecoinvent v 3.8 database sub process as detailed in Table S18 |
|                      | Round bottom flask      | 3.47*10 <sup>-4</sup> p         | Modelled from Ecoinvent v 3.8 database sub process as detailed in Table S15 |
|                      | Separatory funnel       | 2.33*10 <sup>-5</sup> p         | Modelled from Ecoinvent v 3.8 database sub process as detailed in Table S9  |
|                      | Reflux condenser        | 3.12*10 <sup>-4</sup> p         | Modelled from Ecoinvent v 3.8 database sub process as detailed in Table S13 |
|                      | Silicon oil container   | 3.47*10 <sup>-4</sup> p         | Modelled from Ecoinvent v 3.8 database sub process as detailed in Table S6  |
|                      | Funnel                  | 2.90*10 <sup>-6</sup> p         | Modelled from Ecoinvent v 3.8 database sub process as detailed in Table S8  |
|                      |                         |                                 |                                                                             |

|           |              |                               |                            |                                                                             |
|-----------|--------------|-------------------------------|----------------------------|-----------------------------------------------------------------------------|
|           |              | Filter                        | 3.18*10 <sup>-6</sup> p    | Modelled from Ecoinvent v 3.8 database sub process as detailed in Table S7  |
|           |              | Fitting reflux condenser      | 3.12*10 <sup>-4</sup> p    | Modelled from Ecoinvent v 3.8 database sub process as detailed in Table S12 |
|           |              | Rubber tube                   | 5.56*10 <sup>-4</sup> p    | Modelled from Ecoinvent v 3.8 database sub process as detailed in Table S14 |
|           |              | Activated carbon air filter   | 5.5*10 <sup>-4</sup> p     | Modelled from Ecoinvent v 3.8 database sub process as detailed in Table S4  |
|           |              | Aspiration system             | 1.38*10 <sup>-4</sup> p    | Modelled from Ecoinvent v 3.8 database sub process as detailed in Table S3  |
| Transport |              | Transport for large equipment | 2.29*10 <sup>-2</sup> tkm  | Ecoinvent v 3.8 <sup>8</sup>                                                |
|           |              | Transport for raw materials   | 6.52 kgkm                  | Ecoinvent v 3.8 <sup>9</sup>                                                |
|           |              | Transport for small equipment | 6.89*10 <sup>-2</sup> kgkm | Ecoinvent v 3.8 <sup>10</sup>                                               |
| Energy    |              | Electric energy               | 42.90 kJ                   | Ecoinvent v 3.8 <sup>11</sup>                                               |
|           |              |                               | 1440 Wh                    | Ecoinvent v 3.8 <sup>12</sup>                                               |
|           |              |                               | 3.015 kJ                   | Ecoinvent v 3.8 <sup>13</sup>                                               |
|           |              |                               | 630 Wh                     | Ecoinvent v 3.8 <sup>14</sup>                                               |
|           |              |                               | 500 Wh                     | Ecoinvent v 3.8 <sup>15</sup>                                               |
|           |              |                               | 0.92 kWh                   | Ecoinvent v 3.8 <sup>16</sup>                                               |
| Output    | Air emission | DMF                           | 7.28*10 <sup>-7</sup> g    | SimaPro airborne emission substance list <sup>17</sup>                      |
|           |              | HBr                           | 3.6*10 <sup>-3</sup> g     | SimaPro airborne emission substance list <sup>18</sup>                      |
|           |              | H <sub>2</sub> O              | 1.15*10 <sup>-6</sup> g    | SimaPro airborne emission substance list <sup>19</sup>                      |
|           |              | Diethyl ether                 | 5.291*10 <sup>-4</sup> g   | SimaPro airborne emission substance list <sup>20</sup>                      |
|           | End of life  | Spent solvent mixture         | 31.125 g                   | Ecoinvent v 3.8 <sup>21</sup>                                               |

| Incineration                                                                                                                                                                                                                                                                                                                                                                                                           | 1.920 g | Ecoinvent v 3.8 <sup>22</sup> |
|------------------------------------------------------------------------------------------------------------------------------------------------------------------------------------------------------------------------------------------------------------------------------------------------------------------------------------------------------------------------------------------------------------------------|---------|-------------------------------|
| <sup>1</sup> The Ecoinvent process used was: N,N-dimethylformamide {RER}  production   APOS, U.                                                                                                                                                                                                                                                                                                                        |         |                               |
| <sup>2</sup> The Ecoinvent process used was: Potassium carbonate {RER}  oxidation of manganese dioxide   APOS, U.                                                                                                                                                                                                                                                                                                      |         |                               |
| <sup>3</sup> The Ecoinvent process used was: Potassium chloride {RER}  potassium chloride production   APOS, U. During the experimental work potassium iodide was used. Since it is not present in the database, potassium chloride was used as proxy. In this specific run, this reagent was not used, for this reason its quantity is zero in this table.                                                            |         |                               |
| <sup>4</sup> The Ecoinvent process used was: Water, deionised {Europe without Switzerland}  water production, deionised   APOS, U.                                                                                                                                                                                                                                                                                     |         |                               |
| <sup>5</sup> The Ecoinvent process used was: Diethyl ether, without water, in 99.95% solution state {RER}  ethylene hydration   APOS, U.                                                                                                                                                                                                                                                                               |         |                               |
| <sup>6</sup> The Ecoinvent process used was: Magnesium sulfate {RER}  production   APOS, U.                                                                                                                                                                                                                                                                                                                            |         |                               |
| <sup>7</sup> The Ecoinvent process used was: Silicone product {RER}  production   APOS, U.                                                                                                                                                                                                                                                                                                                             |         |                               |
| <sup>8</sup> Transport of large equipment (aspiration system and activated air carbon filter). The Ecoinvent process used was: Transport, freight, lorry 16-32 metric ton, EURO6 {RER}  transport, freight, lorry 16-32 metric ton, EURO6   APOS, U. An average distance of 100km was considered.                                                                                                                      |         |                               |
| <sup>9</sup> Transport for reagents. The Ecoinvent process used was: Transport, freight, lorry 3.5-7.5 metric ton, EURO6 {RER}  transport, freight, lorry 3.5-7.5 metric ton, EURO6   APOS, U. An average distance of 100km was considered.                                                                                                                                                                            |         |                               |
| <sup>10</sup> Transport for small laboratory equipment. The Ecoinvent process used was: Transport, freight, lorry 3.5-7.5 metric ton, EURO6 {RER}  transport, freight, lorry 3.5-7.5 metric ton, EURO6   APOS, U. An average distance of 100 km was considered.                                                                                                                                                        |         |                               |
| <sup>11</sup> Electric energy necessary for the heating up to 100°C of the reaction mixture containing DMF, Vanillin and Bromobutane. It is calculated using the expression $m \cdot C_p \cdot \Delta T$ , considering the specific heat in J/kg°C for each of the substances. The Ecoinvent process used was: Electricity, low voltage {IT}  electricity voltage transformation from medium to low voltage   APOS, U. |         |                               |
| <sup>12</sup> Electric energy necessary to maintain the heating at 100°C of the reaction mixture for 24 hours. It is calculated using the Fourier Equation. The Ecoinvent process used was: Electricity, low voltage {IT}  electricity voltage transformation from medium to low voltage   APOS, U.                                                                                                                    |         |                               |
| <sup>13</sup> Electric energy necessary to eliminate the remaining solvent (DMF) using the rotavapor. It is calculated as $H_{vap}DMF \cdot molDMF$ , considering $H_{vap}DMF$ as its latent heat of vaporization (46.7 kJ/mol) and $molDMF$ as the moles of the solvent. The Ecoinvent process used was: Electricity, low voltage {IT}  electricity voltage transformation from medium to low voltage   APOS, U.      |         |                               |
| <sup>14</sup> Electric energy necessary to use the heating stirrer during the workup phase for 1 hour. It is calculated as $power \cdot time$ , considering 630W as the heating stirrer power. The Ecoinvent process used was: Electricity, low voltage {IT}  electricity voltage transformation from medium to low voltage   APOS, U.                                                                                 |         |                               |
| <sup>15</sup> Electric energy necessary to use the rotavapor after the workup phase for 1 hour. It is calculated as $power \cdot time$ , considering 500W as the rotavapor power. The Ecoinvent process used was: Electricity, low voltage {IT}  electricity voltage transformation from medium to low voltage   APOS, U.                                                                                              |         |                               |
| <sup>16</sup> Electric energy necessary to the use of the aspiration system for the whole synthesis time, i.e. 27 h. The power was calculated by considering the air flow rate of 250 m <sup>3</sup> /h, a total load loss of 110.8076 kg/m <sup>2</sup> , and an efficiency of 90%: Electricity, low voltage {IT}  electricity voltage transformation from medium to low voltage   APOS, U.                           |         |                               |
| <sup>17</sup> Amount of DMF released into the atmosphere, as calculated by the formula reported in equation 4 of the main manuscript.                                                                                                                                                                                                                                                                                  |         |                               |
| <sup>18</sup> Amount of HBr released into the atmosphere, as calculated by the formula reported in equation 4 of the main manuscript.                                                                                                                                                                                                                                                                                  |         |                               |
| <sup>19</sup> Amount of Water released into the atmosphere, as calculated by the formula reported in equation 4 of the main manuscript.                                                                                                                                                                                                                                                                                |         |                               |
| <sup>20</sup> Amount of Diethyl ether released into the atmosphere, as calculated by the formula reported in equation 4 of the main manuscript.                                                                                                                                                                                                                                                                        |         |                               |
| <sup>21</sup> End of life of liquid waste, including DMF, Diethyl ether and water. The Ecoinvent process used was: Spent solvent mixture {Europe without Switzerland}  treatment of spent solvent mixture, hazardous waste incineration, with energy recovery   APOS, U.                                                                                                                                               |         |                               |
| <sup>22</sup> End of life of the solid waste recovered after the filtration following the first part of the synthesis. The Ecoinvent process used was: Hazardous waste, for incineration {RoW}  treatment of hazardous waste, hazardous waste incineration, with energy recovery   APOS, U.                                                                                                                            |         |                               |

**Table S33.** Contributions to the Life Cycle Inventory (LCI) for the synthesis of 0.0151 g of 4-butoxy-3-methoxybenzaldehyde. This is Reaction 10 (Run 4), carried in Acetone as solvent with a reaction time of 8 hours, as reported in Table 1 in the main manuscript.

| Description           |                      |                                 | Amount                                                                      | Process Data Source                                                         |
|-----------------------|----------------------|---------------------------------|-----------------------------------------------------------------------------|-----------------------------------------------------------------------------|
| Input                 | Materials            | Acetone                         | 15.68 g                                                                     | Ecoinvent v 3.8 <sup>1</sup>                                                |
|                       |                      | K <sub>2</sub> CO <sub>3</sub>  | 0.91169 g                                                                   | Ecoinvent v 3.8 <sup>2</sup>                                                |
|                       |                      | KCl                             | 0 g                                                                         | Ecoinvent v 3.8 <sup>3</sup>                                                |
|                       |                      | Bromobutane                     | 0.476 g                                                                     | Modelled from Ecoinvent v 3.8 database sub process as detailed in Table S23 |
|                       |                      | Vanillin                        | 0.519 g                                                                     | Modelled from Ecoinvent v 3.8 database sub process as detailed in Table S20 |
|                       |                      | H <sub>2</sub> O                | 5 g                                                                         | Ecoinvent v 3.8 <sup>4</sup>                                                |
|                       |                      | Diethyl ether                   | 21.405 g                                                                    | Ecoinvent v 3.8 <sup>5</sup>                                                |
|                       |                      | Mg <sub>2</sub> SO <sub>4</sub> | 1 g                                                                         | Ecoinvent v 3.8 <sup>6</sup>                                                |
|                       |                      | Silicon oil                     | 1.72*10 <sup>-2</sup> p                                                     | Ecoinvent v 3.8 <sup>7</sup>                                                |
|                       | Equipment/<br>plants | Magnetic stirrer/heater         | 1.8*10 <sup>-4</sup> p                                                      | Modelled from Ecoinvent v 3.8 database sub process as detailed in Table S18 |
| Round bottom flask    |                      | 3.47*10 <sup>-4</sup> p         | Modelled from Ecoinvent v 3.8 database sub process as detailed in Table S15 |                                                                             |
| Separatory funnel     |                      | 2.33*10 <sup>-5</sup> p         | Modelled from Ecoinvent v 3.8 database sub process as detailed in Table S9  |                                                                             |
| Reflux condenser      |                      | 3.12*10 <sup>-4</sup> p         | Modelled from Ecoinvent v 3.8 database sub process as detailed in Table S13 |                                                                             |
| Silicon oil container |                      | 3.47*10 <sup>-4</sup> p         | Modelled from Ecoinvent v 3.8 database sub process as detailed in Table S6  |                                                                             |
| Funnel                |                      | 2.90*10 <sup>-6</sup> p         | Modelled from Ecoinvent v 3.8 database sub process as detailed in Table S8  |                                                                             |

|             |                               |                            |                                                                             |                                                        |
|-------------|-------------------------------|----------------------------|-----------------------------------------------------------------------------|--------------------------------------------------------|
|             | Filter                        | 3.18*10 <sup>-6</sup> p    | Modelled from Ecoinvent v 3.8 database sub process as detailed in Table S7  |                                                        |
|             | Fitting reflux condenser      | 3.12*10 <sup>-4</sup> p    | Modelled from Ecoinvent v 3.8 database sub process as detailed in Table S12 |                                                        |
|             | Rubber tube                   | 5.56*10 <sup>-4</sup> p    | Modelled from Ecoinvent v 3.8 database sub process as detailed in Table S14 |                                                        |
|             | Activated carbon air filter   | 5.5*10 <sup>-4</sup> p     | Modelled from Ecoinvent v 3.8 database sub process as detailed in Table S4  |                                                        |
|             | Aspiration system             | 1.38*10 <sup>-4</sup> p    | Modelled from Ecoinvent v 3.8 database sub process as detailed in Table S3  |                                                        |
| Transport   | Transport for large equipment | 2.29*10 <sup>-2</sup> tkm  | Ecoinvent v 3.8 <sup>8</sup>                                                |                                                        |
|             | Transport for raw materials   | 8.50 kgkm                  | Ecoinvent v 3.8 <sup>9</sup>                                                |                                                        |
|             | Transport for small equipment | 5.36*10 <sup>-1</sup> kgkm | Ecoinvent v 3.8 <sup>10</sup>                                               |                                                        |
| Energy      | Electric energy               | 11.40 kJ                   | Ecoinvent v 3.8 <sup>11</sup>                                               |                                                        |
|             |                               | 1440 Wh                    | Ecoinvent v 3.8 <sup>12</sup>                                               |                                                        |
|             |                               | 8.64 kJ                    | Ecoinvent v 3.8 <sup>13</sup>                                               |                                                        |
|             |                               | 630 Wh                     | Ecoinvent v 3.8 <sup>14</sup>                                               |                                                        |
|             |                               | 500 Wh                     | Ecoinvent v 3.8 <sup>15</sup>                                               |                                                        |
|             |                               | 0.92 kWh                   | Ecoinvent v 3.8 <sup>16</sup>                                               |                                                        |
| Output      | Air emission                  | Acetone                    | 1.44*10 <sup>-4</sup> g                                                     | SimaPro airborne emission substance list <sup>17</sup> |
|             |                               | HBr                        | 1.45*10 <sup>-4</sup> g                                                     | SimaPro airborne emission substance list <sup>18</sup> |
|             |                               | H <sub>2</sub> O           | 1.15*10 <sup>-6</sup> g                                                     | SimaPro airborne emission substance list <sup>19</sup> |
|             |                               | Diethyl ether              | 5.29*10 <sup>-4</sup> g                                                     | SimaPro airborne emission substance list <sup>20</sup> |
| End of life | Spent solvent mixture         | 42.085 g                   | Ecoinvent v 3.8 <sup>21</sup>                                               |                                                        |

| Incineration                                                                                                                                                                                                                                                                                                                                                                                                                    | 1.912 g | Ecoinvent v 3.8 <sup>22</sup> |
|---------------------------------------------------------------------------------------------------------------------------------------------------------------------------------------------------------------------------------------------------------------------------------------------------------------------------------------------------------------------------------------------------------------------------------|---------|-------------------------------|
| <sup>1</sup> The Ecoinvent process used was: Acetone, liquid {RER}  production   APOS, U                                                                                                                                                                                                                                                                                                                                        |         |                               |
| <sup>2</sup> The Ecoinvent process used was: Potassium carbonate {RER}  oxidation of manganese dioxide   APOS, U.                                                                                                                                                                                                                                                                                                               |         |                               |
| <sup>3</sup> The Ecoinvent process used was: Potassium chloride {RER}  potassium chloride production   APOS, U. During the experimental work potassium iodide was used. Since it is not present in the database, potassium chloride was used as proxy. In this specific run, this reagent was not used, for this reason its quantity is zero in this table.                                                                     |         |                               |
| <sup>4</sup> The Ecoinvent process used was: Water, deionised {Europe without Switzerland}  water production, deionised   APOS, U.                                                                                                                                                                                                                                                                                              |         |                               |
| <sup>5</sup> The Ecoinvent process used was: Diethyl ether, without water, in 99.95% solution state {RER}  ethylene hydration   APOS, U.                                                                                                                                                                                                                                                                                        |         |                               |
| <sup>6</sup> The Ecoinvent process used was: Magnesium sulfate {RER}  production   APOS, U.                                                                                                                                                                                                                                                                                                                                     |         |                               |
| <sup>7</sup> The Ecoinvent process used was: Silicone product {RER}  production   APOS, U.                                                                                                                                                                                                                                                                                                                                      |         |                               |
| <sup>8</sup> Transport of large equipment (aspiration system and activated air carbon filter). The Ecoinvent process used was: Transport, freight, lorry 16-32 metric ton, EURO6 {RER}  transport, freight, lorry 16-32 metric ton, EURO6   APOS, U. An average distance of 100km was considered.                                                                                                                               |         |                               |
| <sup>9</sup> Transport for reagents. The Ecoinvent process used was: Transport, freight, lorry 3.5-7.5 metric ton, EURO6 {RER}  transport, freight, lorry 3.5-7.5 metric ton, EURO6   APOS, U. An average distance of 100km was considered.                                                                                                                                                                                     |         |                               |
| <sup>10</sup> Transport for small laboratory equipment. The Ecoinvent process used was: Transport, freight, lorry 3.5-7.5 metric ton, EURO6 {RER}  transport, freight, lorry 3.5-7.5 metric ton, EURO6   APOS, U. An average distance of 100 km was considered.                                                                                                                                                                 |         |                               |
| <sup>11</sup> Electric energy necessary for the heating up to 100°C of the reaction mixture containing Acetone, Vanillin and Bromobutane. It is calculated using the expression $m \cdot C_p \cdot DT$ , considering the specific heat in J/kg°C for each of the substances. The Ecoinvent process used was: Electricity, low voltage {IT}  electricity voltage transformation from medium to low voltage   APOS, U.            |         |                               |
| <sup>12</sup> Electric energy necessary to maintain the heating at 100°C of the reaction mixture for 8 hours. It is calculated using the Fourier Equation. The Ecoinvent process used was: Electricity, low voltage {IT}  electricity voltage transformation from medium to low voltage   APOS, U.                                                                                                                              |         |                               |
| <sup>13</sup> Electric energy necessary to eliminate the remaining solvent (ACN) using the rotavapor. It is calculated as $H_{vap}Acetone \cdot molAcetone$ , considering $H_{vap}Acetone$ as its latent heat of vaporization (32 kJ/mol) and $molAcetone$ as the moles of the solvent. The Ecoinvent process used was: Electricity, low voltage {IT}  electricity voltage transformation from medium to low voltage   APOS, U. |         |                               |
| <sup>14</sup> Electric energy necessary to use the heating stirrer during the workup phase for 1 hour. It is calculated as $power \cdot time$ , considering 630W as the heating stirrer power. The Ecoinvent process used was: Electricity, low voltage {IT}  electricity voltage transformation from medium to low voltage   APOS, U.                                                                                          |         |                               |
| <sup>15</sup> Electric energy necessary to use the rotavapor after the workup phase for 1 hour. It is calculated as $power \cdot time$ , considering 500W as the rotavapor power. The Ecoinvent process used was: Electricity, low voltage {IT}  electricity voltage transformation from medium to low voltage   APOS, U.                                                                                                       |         |                               |
| <sup>16</sup> Electric energy necessary to the use of the aspiration system for the whole synthesis time, i.e. 11 h. The power was calculated by considering the air flow rate of 250 m <sup>3</sup> /h, a total load loss of 110.8076 kg/m <sup>2</sup> , and an efficiency of 90%: Electricity, low voltage {IT}  electricity voltage transformation from medium to low voltage   APOS, U.                                    |         |                               |
| <sup>17</sup> Amount of Acetone released into the atmosphere, as calculated by the formula reported in equation 4 of the main manuscript.                                                                                                                                                                                                                                                                                       |         |                               |
| <sup>18</sup> Amount of HBr released into the atmosphere, as calculated by the formula reported in equation 4 of the main manuscript.                                                                                                                                                                                                                                                                                           |         |                               |
| <sup>19</sup> Amount of Water released into the atmosphere, as calculated by the formula reported in equation 4 of the main manuscript.                                                                                                                                                                                                                                                                                         |         |                               |
| <sup>20</sup> Amount of Diethyl ether released into the atmosphere, as calculated by the formula reported in equation 4 of the main manuscript.                                                                                                                                                                                                                                                                                 |         |                               |
| <sup>21</sup> End of life of liquid waste, including Acetone, Diethyl ether and water. The Ecoinvent process used was: Spent solvent mixture {Europe without Switzerland}  treatment of spent solvent mixture, hazardous waste incineration, with energy recovery   APOS, U.                                                                                                                                                    |         |                               |
| <sup>22</sup> End of life of the solid waste recovered after the filtration following the first part of the synthesis. The Ecoinvent process used was: Hazardous waste, for incineration {RoW}  treatment of hazardous waste, hazardous waste incineration, with energy recovery   APOS, U.                                                                                                                                     |         |                               |

**Table S34.** Contributions to the Life Cycle Inventory (LCI) for the synthesis of 0.33116 g of 4-butoxy-3-methoxybenzaldehyde. This is Reaction 11 (Run 9), carried in Acetonitrile as solvent with a reaction time of 8 hours, as reported in Table 1 in the main manuscript.

| Description          |                         | Amount                          | Process Data Source                                                         |
|----------------------|-------------------------|---------------------------------|-----------------------------------------------------------------------------|
| Input                | Materials               | ACN                             | Ecoinvent v 3.8 <sup>1</sup>                                                |
|                      |                         | K <sub>2</sub> CO <sub>3</sub>  | Ecoinvent v 3.8 <sup>2</sup>                                                |
|                      |                         | KCl                             | Ecoinvent v 3.8 <sup>3</sup>                                                |
|                      |                         | Bromobutane                     | Modelled from Ecoinvent v 3.8 database sub process as detailed in Table S23 |
|                      |                         | Vanillin                        | Modelled from Ecoinvent v 3.8 database sub process as detailed in Table S20 |
|                      |                         | H <sub>2</sub> O                | Ecoinvent v 3.8 <sup>4</sup>                                                |
|                      |                         | Diethyl ether                   | Ecoinvent v 3.8 <sup>5</sup>                                                |
|                      |                         | Mg <sub>2</sub> SO <sub>4</sub> | Ecoinvent v 3.8 <sup>6</sup>                                                |
|                      |                         | Silicon oil                     | Ecoinvent v 3.8 <sup>7</sup>                                                |
|                      |                         |                                 |                                                                             |
| Equipment/<br>plants | Magnetic stirrer/heater | 2*10 <sup>-4</sup> p            | Modelled from Ecoinvent v 3.8 database sub process as detailed in Table S18 |
|                      | Round bottom flask      | 3.47*10 <sup>-4</sup> p         | Modelled from Ecoinvent v 3.8 database sub process as detailed in Table S15 |
|                      | Separatory funnel       | 2.33*10 <sup>-5</sup> p         | Modelled from Ecoinvent v 3.8 database sub process as detailed in Table S9  |
|                      | Reflux condenser        | 3.12*10 <sup>-4</sup> p         | Modelled from Ecoinvent v 3.8 database sub process as detailed in Table S13 |
|                      | Silicon oil container   | 3.47*10 <sup>-4</sup> p         | Modelled from Ecoinvent v 3.8 database sub process as detailed in Table S6  |
|                      | Funnel                  | 2.90*10 <sup>-6</sup> p         | Modelled from Ecoinvent v 3.8 database sub process as detailed in Table S8  |
|                      |                         |                                 |                                                                             |



|           |              |                               |                           |                                                                             |
|-----------|--------------|-------------------------------|---------------------------|-----------------------------------------------------------------------------|
|           |              | Filter                        | $3.18 \cdot 10^{-6}$ p    | Modelled from Ecoinvent v 3.8 database sub process as detailed in Table S7  |
|           |              | Fitting reflux condenser      | $2.78 \cdot 10^{-4}$ p    | Modelled from Ecoinvent v 3.8 database sub process as detailed in Table S12 |
|           |              | Rubber tube                   | $5.56 \cdot 10^{-4}$ p    | Modelled from Ecoinvent v 3.8 database sub process as detailed in Table S14 |
|           |              | Activated carbon air filter   | $5.5 \cdot 10^{-4}$ p     | Modelled from Ecoinvent v 3.8 database sub process as detailed in Table S4  |
|           |              | Aspiration system             | $1.38 \cdot 10^{-4}$ p    | Modelled from Ecoinvent v 3.8 database sub process as detailed in Table S3  |
| Transport |              | Transport for large equipment | $2.29 \cdot 10^{-2}$ tkm  | Ecoinvent v 3.8 <sup>8</sup>                                                |
|           |              | Transport for raw materials   | 8.73 kgkm                 | Ecoinvent v 3.8 <sup>9</sup>                                                |
|           |              | Transport for small equipment | $7.44 \cdot 10^{-2}$ kgkm | Ecoinvent v 3.8 <sup>10</sup>                                               |
| Energy    |              | Electric energy               | 28.25 kJ                  | Ecoinvent v 3.8 <sup>11</sup>                                               |
|           |              |                               | 1056 Wh                   | Ecoinvent v 3.8 <sup>12</sup>                                               |
|           |              |                               | 11.37 kJ                  | Ecoinvent v 3.8 <sup>13</sup>                                               |
|           |              |                               | 630 Wh                    | Ecoinvent v 3.8 <sup>14</sup>                                               |
|           |              |                               | 500 Wh                    | Ecoinvent v 3.8 <sup>15</sup>                                               |
|           |              |                               | 0.92 kWh                  | Ecoinvent v 3.8 <sup>16</sup>                                               |
| Output    | Air emission | ACN                           | $4.28 \cdot 10^{-5}$ g    | SimaPro airborne emission substance list <sup>17</sup>                      |
|           |              | HBr                           | $3.42 \cdot 10^{-3}$ g    | SimaPro airborne emission substance list <sup>18</sup>                      |
|           |              | H <sub>2</sub> O              | $1.15 \cdot 10^{-6}$ g    | SimaPro airborne emission substance list <sup>19</sup>                      |
|           |              | Diethyl ether                 | $5.291 \cdot 10^{-4}$ g   | SimaPro airborne emission substance list <sup>20</sup>                      |
|           | End of life  | Spent solvent mixture         | 42.065 g                  | Ecoinvent v 3.8 <sup>21</sup>                                               |

| Incineration                                                                                                                                                                                                                                                                                                                                                                                                       | 3.132 g | Ecoinvent v 3.8 <sup>22</sup> |
|--------------------------------------------------------------------------------------------------------------------------------------------------------------------------------------------------------------------------------------------------------------------------------------------------------------------------------------------------------------------------------------------------------------------|---------|-------------------------------|
| <sup>1</sup> The Ecoinvent process used was: Acetonitrile {RER}   Sohio process   APOS, U.                                                                                                                                                                                                                                                                                                                         |         |                               |
| <sup>2</sup> The Ecoinvent process used was: Potassium carbonate {RER}   oxidation of manganese dioxide   APOS, U.                                                                                                                                                                                                                                                                                                 |         |                               |
| <sup>3</sup> The Ecoinvent process used was: Potassium chloride {RER}   potassium chloride production   APOS, U. During the experimental work potassium iodide was used. Since it is not present in the database, potassium chloride was used as proxy.                                                                                                                                                            |         |                               |
| <sup>4</sup> The Ecoinvent process use was: Water, deionised {Europe without Switzerland}   water production, deionised   APOS, U.                                                                                                                                                                                                                                                                                 |         |                               |
| <sup>5</sup> The Ecoinvent process used was: Diethyl ether, without water, in 99.95% solution state {RER}   ethylene hydration   APOS, U.                                                                                                                                                                                                                                                                          |         |                               |
| <sup>6</sup> The Ecoinvent process used was: Magnesium sulfate {RER}   production   APOS, U.                                                                                                                                                                                                                                                                                                                       |         |                               |
| <sup>7</sup> The Ecoinvent process used was: Silicone product {RER}   production   APOS, U.                                                                                                                                                                                                                                                                                                                        |         |                               |
| <sup>8</sup> Transport of large equipment (aspiration system and activated air carbon filter). The Ecoinvent process used was: Transport, freight, lorry 16-32 metric ton, EURO6 {RER}   transport, freight, lorry 16-32 metric ton, EURO6   APOS, U. An average distance of 100km was considered.                                                                                                                 |         |                               |
| <sup>9</sup> Transport for reagents. The Ecoinvent process used was: Transport, freight, lorry 3.5-7.5 metric ton, EURO6 {RER}   transport, freight, lorry 3.5-7.5 metric ton, EURO6   APOS, U. An average distance of 100km was considered.                                                                                                                                                                       |         |                               |
| <sup>10</sup> Transport for small laboratory equipment. The Ecoinvent process used was: Transport, freight, lorry 3.5-7.5 metric ton, EURO6 {RER}   transport, freight, lorry 3.5-7.5 metric ton, EURO6   APOS, U. An average distance of 100 km was considered.                                                                                                                                                   |         |                               |
| <sup>11</sup> Electric energy necessary for the heating up to 100°C of the reaction mixture containing ACN, Vanillin and Bromobutane. It is calculated using the expression $m \cdot C_p \cdot DT$ , considering the specific heat in J/kg°C for each of the substances. The Ecoinvent process used was: Electricity, low voltage {IT}   electricity voltage transformation from medium to low voltage   APOS, U.  |         |                               |
| <sup>12</sup> Electric energy necessary to maintain the heating at 100°C of the reaction mixture for 8 hours. It is calculated using the Fourier Equation. The Ecoinvent process used was: Electricity, low voltage {IT}   electricity voltage transformation from medium to low voltage   APOS, U.                                                                                                                |         |                               |
| <sup>13</sup> Electric energy necessary to eliminate the remaining solvent (ACN) using the rotavapor. It is calculated as $H_{vap}ACN \cdot molACN$ , considering $H_{vap}ACN$ as its latent heat of vaporization (29.8 kJ/mol) and $molACN$ as the moles of the solvent. The Ecoinvent process used was: Electricity, low voltage {IT}   electricity voltage transformation from medium to low voltage   APOS, U. |         |                               |
| <sup>14</sup> Electric energy necessary to use the heating stirrer during the workup phase for 1 hour. It is calculated as $power \cdot time$ , considering 630W as the heating stirrer power. The Ecoinvent process used was: Electricity, low voltage {IT}   electricity voltage transformation from medium to low voltage   APOS, U.                                                                            |         |                               |
| <sup>15</sup> Electric energy necessary to use the rotavapor after the workup phase for 1 hour. It is calculated as $power \cdot time$ , considering 500W as the rotavapor power. The Ecoinvent process used was: Electricity, low voltage {IT}   electricity voltage transformation from medium to low voltage   APOS, U.                                                                                         |         |                               |
| <sup>16</sup> Electric energy necessary to the use of the aspiration system for the whole synthesis time, i.e. 11 h. The power was calculated by considering the air flow rate of 250 m <sup>3</sup> /h, a total load loss of 110.8076 kg/m <sup>2</sup> , and an efficiency of 90%: Electricity, low voltage {IT}   electricity voltage transformation from medium to low voltage   APOS, U.                      |         |                               |
| <sup>17</sup> Amount of ACN released into the atmosphere, as calculated by the formula reported in equation 4 of the main manuscript.                                                                                                                                                                                                                                                                              |         |                               |
| <sup>18</sup> Amount of HBr released into the atmosphere, as calculated by the formula reported in equation 4 of the main manuscript.                                                                                                                                                                                                                                                                              |         |                               |
| <sup>19</sup> Amount of Water released into the atmosphere, as calculated by the formula reported in equation 4 of the main manuscript.                                                                                                                                                                                                                                                                            |         |                               |
| <sup>20</sup> Amount of Diethyl ether released into the atmosphere, as calculated by the formula reported in equation 4 of the main manuscript.                                                                                                                                                                                                                                                                    |         |                               |
| <sup>21</sup> End of life of liquid waste, including ACN, Diethyl ether and water. The Ecoinvent process used was: Spent solvent mixture {Europe without Switzerland}   treatment of spent solvent mixture, hazardous waste incineration, with energy recovery   APOS, U.                                                                                                                                          |         |                               |
| <sup>22</sup> End of life of the solid waste recovered after the filtration following the first part of the synthesis. The Ecoinvent process used was: Hazardous waste, for incineration {RoW}   treatment of hazardous waste, hazardous waste incineration, with energy recovery   APOS, U.                                                                                                                       |         |                               |

**Table S35.** Contributions to the Life Cycle Inventory (LCI) for the synthesis of 0.0151 g of 4-butoxy-3-methoxybenzaldehyde. This is Reaction 12 (Run 5), carried in Acetone as solvent with a reaction time of 24 hours, as reported in Table 1 in the main manuscript.

| Description |                      | Amount                          | Process Data Source                                                         |
|-------------|----------------------|---------------------------------|-----------------------------------------------------------------------------|
| Input       | Materials            | Acetone                         | Ecoinvent v 3.8 <sup>1</sup>                                                |
|             |                      | K <sub>2</sub> CO <sub>3</sub>  | Ecoinvent v 3.8 <sup>2</sup>                                                |
|             |                      | KCl                             | Ecoinvent v 3.8 <sup>3</sup>                                                |
|             |                      | Bromobutane                     | Modelled from Ecoinvent v 3.8 database sub process as detailed in Table S23 |
|             |                      | Vanillin                        | Modelled from Ecoinvent v 3.8 database sub process as detailed in Table S20 |
|             |                      | H <sub>2</sub> O                | Ecoinvent v 3.8 <sup>4</sup>                                                |
|             |                      | Diethyl ether                   | Ecoinvent v 3.8 <sup>5</sup>                                                |
|             |                      | Mg <sub>2</sub> SO <sub>4</sub> | Ecoinvent v 3.8 <sup>6</sup>                                                |
|             |                      | Silicon oil                     | Ecoinvent v 3.8 <sup>7</sup>                                                |
|             | Equipment/<br>plants | Magnetic stirrer/heater         | Modelled from Ecoinvent v 3.8 database sub process as detailed in Table S18 |
|             |                      | Round bottom flask              | Modelled from Ecoinvent v 3.8 database sub process as detailed in Table S15 |
|             |                      | Separatory funnel               | Modelled from Ecoinvent v 3.8 database sub process as detailed in Table S9  |
|             |                      | Reflux condenser                | Modelled from Ecoinvent v 3.8 database sub process as detailed in Table S13 |
|             |                      | Silicon oil container           | Modelled from Ecoinvent v 3.8 database sub process as detailed in Table S6  |
|             |                      | Funnel                          | Modelled from Ecoinvent v 3.8 database sub process as detailed in Table S8  |

|             |                               |                            |                                                                             |                                                        |
|-------------|-------------------------------|----------------------------|-----------------------------------------------------------------------------|--------------------------------------------------------|
|             | Filter                        | 3.18*10 <sup>-6</sup> p    | Modelled from Ecoinvent v 3.8 database sub process as detailed in Table S7  |                                                        |
|             | Fitting reflux condenser      | 8.69*10 <sup>-4</sup> p    | Modelled from Ecoinvent v 3.8 database sub process as detailed in Table S12 |                                                        |
|             | Rubber tube                   | 1.67*10 <sup>-3</sup> p    | Modelled from Ecoinvent v 3.8 database sub process as detailed in Table S14 |                                                        |
|             | Activated carbon air filter   | 1.35*10 <sup>-3</sup> p    | Modelled from Ecoinvent v 3.8 database sub process as detailed in Table S4  |                                                        |
|             | Aspiration system             | 3.38*10 <sup>-4</sup> p    | Modelled from Ecoinvent v 3.8 database sub process as detailed in Table S3  |                                                        |
| Transport   | Transport for large equipment | 5.63*10 <sup>-2</sup> tkm  | Ecoinvent v 3.8 <sup>8</sup>                                                |                                                        |
|             | Transport for raw materials   | 8.72 kgkm                  | Ecoinvent v 3.8 <sup>9</sup>                                                |                                                        |
|             | Transport for small equipment | 1.91*10 <sup>-1</sup> kgkm | Ecoinvent v 3.8 <sup>10</sup>                                               |                                                        |
| Energy      | Electric energy               | 11.40 kJ                   | Ecoinvent v 3.8 <sup>11</sup>                                               |                                                        |
|             |                               | 1440 Wh                    | Ecoinvent v 3.8 <sup>12</sup>                                               |                                                        |
|             |                               | 8.64 kJ                    | Ecoinvent v 3.8 <sup>13</sup>                                               |                                                        |
|             |                               | 630 Wh                     | Ecoinvent v 3.8 <sup>14</sup>                                               |                                                        |
|             |                               | 500 Wh                     | Ecoinvent v 3.8 <sup>15</sup>                                               |                                                        |
|             |                               | 2.26 kWh                   | Ecoinvent v 3.8 <sup>16</sup>                                               |                                                        |
| Output      | Air emission                  | Acetone                    | 1.44*10 <sup>-4</sup> g                                                     | SimaPro airborne emission substance list <sup>17</sup> |
|             |                               | HBr                        | 1.57*10 <sup>-3</sup> g                                                     | SimaPro airborne emission substance list <sup>18</sup> |
|             |                               | H <sub>2</sub> O           | 1.15*10 <sup>-6</sup> g                                                     | SimaPro airborne emission substance list <sup>19</sup> |
|             |                               | Diethyl ether              | 5.29*10 <sup>-4</sup> g                                                     | SimaPro airborne emission substance list <sup>20</sup> |
| End of life | Spent solvent mixture         | 42.085 g                   | Ecoinvent v 3.8 <sup>21</sup>                                               |                                                        |

| Incineration                                                                                                                                                                                                                                                                                                                                                                                                                    | 3.067 g | Ecoinvent v 3.8 <sup>22</sup> |
|---------------------------------------------------------------------------------------------------------------------------------------------------------------------------------------------------------------------------------------------------------------------------------------------------------------------------------------------------------------------------------------------------------------------------------|---------|-------------------------------|
| <sup>1</sup> The Ecoinvent process used was: Acetone, liquid {RER}  production   APOS, U                                                                                                                                                                                                                                                                                                                                        |         |                               |
| <sup>2</sup> The Ecoinvent process used was: Potassium carbonate {RER}  oxidation of manganese dioxide   APOS, U.                                                                                                                                                                                                                                                                                                               |         |                               |
| <sup>3</sup> The Ecoinvent process used was: Potassium chloride {RER}  potassium chloride production   APOS, U. During the experimental work potassium iodide was used. Since it is not present in the database, potassium chloride was used as proxy.                                                                                                                                                                          |         |                               |
| <sup>4</sup> The Ecoinvent process use was: Water, deionised {Europe without Switzerland}  water production, deionised   APOS, U.                                                                                                                                                                                                                                                                                               |         |                               |
| <sup>5</sup> The Ecoinvent process used was: Diethyl ether, without water, in 99.95% solution state {RER}  ethylene hydration   APOS, U.                                                                                                                                                                                                                                                                                        |         |                               |
| <sup>6</sup> The Ecoinvent process used was: Magnesium sulfate {RER}  production   APOS, U.                                                                                                                                                                                                                                                                                                                                     |         |                               |
| <sup>7</sup> The Ecoinvent process used was: Silicone product {RER}  production   APOS, U.                                                                                                                                                                                                                                                                                                                                      |         |                               |
| <sup>8</sup> Transport of large equipment (aspiration system and activated air carbon filter). The Ecoinvent process used was: Transport, freight, lorry 16-32 metric ton, EURO6 {RER}  transport, freight, lorry 16-32 metric ton, EURO6   APOS, U. An average distance of 100km was considered.                                                                                                                               |         |                               |
| <sup>9</sup> Transport for reagents. The Ecoinvent process used was: Transport, freight, lorry 3.5-7.5 metric ton, EURO6 {RER}  transport, freight, lorry 3.5-7.5 metric ton, EURO6   APOS, U. An average distance of 100km was considered.                                                                                                                                                                                     |         |                               |
| <sup>10</sup> Transport for small laboratory equipment. The Ecoinvent process used was: Transport, freight, lorry 3.5-7.5 metric ton, EURO6 {RER}  transport, freight, lorry 3.5-7.5 metric ton, EURO6   APOS, U. An average distance of 100 km was considered.                                                                                                                                                                 |         |                               |
| <sup>11</sup> Electric energy necessary for the heating up to 100°C of the reaction mixture containing Acetone, Vanillin and Bromobutane. It is calculated using the expression $m \cdot C_p \cdot DT$ , considering the specific heat in J/kg°C for each of the substances. The Ecoinvent process used was: Electricity, low voltage {IT}  electricity voltage transformation from medium to low voltage   APOS, U.            |         |                               |
| <sup>12</sup> Electric energy necessary to maintain the heating at 100°C of the reaction mixture for 24 hours. It is calculated using the Fourier Equation. The Ecoinvent process used was: Electricity, low voltage {IT}  electricity voltage transformation from medium to low voltage   APOS, U.                                                                                                                             |         |                               |
| <sup>13</sup> Electric energy necessary to eliminate the remaining solvent (ACN) using the rotavapor. It is calculated as $H_{vap}Acetone \cdot molAcetone$ , considering $H_{vap}Acetone$ as its latent heat of vaporization (32 kJ/mol) and $molAcetone$ as the moles of the solvent. The Ecoinvent process used was: Electricity, low voltage {IT}  electricity voltage transformation from medium to low voltage   APOS, U. |         |                               |
| <sup>14</sup> Electric energy necessary to use the heating stirrer during the workup phase for 1 hour. It is calculated as $power \cdot time$ , considering 630W as the heating stirrer power. The Ecoinvent process used was: Electricity, low voltage {IT}  electricity voltage transformation from medium to low voltage   APOS, U.                                                                                          |         |                               |
| <sup>15</sup> Electric energy necessary to use the rotavapor after the workup phase for 1 hour. It is calculated as $power \cdot time$ , considering 500W as the rotavapor power. The Ecoinvent process used was: Electricity, low voltage {IT}  electricity voltage transformation from medium to low voltage   APOS, U.                                                                                                       |         |                               |
| <sup>16</sup> Electric energy necessary to the use of the aspiration system for the whole synthesis time, i.e. 27 h. The power was calculated by considering the air flow rate of 250 m <sup>3</sup> /h, a total load loss of 110.8076 kg/m <sup>2</sup> , and an efficiency of 90%: Electricity, low voltage {IT}  electricity voltage transformation from medium to low voltage   APOS, U.                                    |         |                               |
| <sup>17</sup> Amount of Acetone released into the atmosphere, as calculated by the formula reported in equation 4 of the main manuscript.                                                                                                                                                                                                                                                                                       |         |                               |
| <sup>18</sup> Amount of HBr released into the atmosphere, as calculated by the formula reported in equation 4 of the main manuscript.                                                                                                                                                                                                                                                                                           |         |                               |
| <sup>19</sup> Amount of Water released into the atmosphere, as calculated by the formula reported in equation 4 of the main manuscript.                                                                                                                                                                                                                                                                                         |         |                               |
| <sup>20</sup> Amount of Diethyl ether released into the atmosphere, as calculated by the formula reported in equation 4 of the main manuscript.                                                                                                                                                                                                                                                                                 |         |                               |
| <sup>21</sup> End of life of liquid waste, including Acetone, Diethyl ether and water. The Ecoinvent process used was: Spent solvent mixture {Europe without Switzerland}  treatment of spent solvent mixture, hazardous waste incineration, with energy recovery   APOS, U.                                                                                                                                                    |         |                               |
| <sup>22</sup> End of life of the solid waste recovered after the filtration following the first part of the synthesis. The Ecoinvent process used was: Hazardous waste, for incineration {RoW}  treatment of hazardous waste, hazardous waste incineration, with energy recovery   APOS, U.                                                                                                                                     |         |                               |

**Table S36.** Contributions to the Life Cycle Inventory (LCI) for the synthesis of 0.37416 g of 4-butoxy-3-methoxybenzaldehyde. This is Reaction 13 (Run 8), carried in Acetonitrile as solvent with a reaction time of 24 hours, as reported in Table 1 in the main manuscript.

| Description |                      | Amount                          | Process Data Source                                                         |
|-------------|----------------------|---------------------------------|-----------------------------------------------------------------------------|
| Input       | Materials            | ACN                             | Ecoinvent v 3.8 <sup>1</sup>                                                |
|             |                      | K <sub>2</sub> CO <sub>3</sub>  | Ecoinvent v 3.8 <sup>2</sup>                                                |
|             |                      | KCl                             | Ecoinvent v 3.8 <sup>3</sup>                                                |
|             |                      | Bromobutane                     | Modelled from Ecoinvent v 3.8 database sub process as detailed in Table S23 |
|             |                      | Vanillin                        | Modelled from Ecoinvent v 3.8 database sub process as detailed in Table S20 |
|             |                      | H <sub>2</sub> O                | Ecoinvent v 3.8 <sup>4</sup>                                                |
|             |                      | Diethyl ether                   | Ecoinvent v 3.8 <sup>5</sup>                                                |
|             |                      | Mg <sub>2</sub> SO <sub>4</sub> | Ecoinvent v 3.8 <sup>6</sup>                                                |
|             |                      | Silicon oil                     | Ecoinvent v 3.8 <sup>7</sup>                                                |
|             | Equipment/<br>plants | Magnetic stirrer/heater         | Modelled from Ecoinvent v 3.8 database sub process as detailed in Table S18 |
|             |                      | Round bottom flask              | Modelled from Ecoinvent v 3.8 database sub process as detailed in Table S15 |
|             |                      | Separatory funnel               | Modelled from Ecoinvent v 3.8 database sub process as detailed in Table S9  |
|             |                      | Reflux condenser                | Modelled from Ecoinvent v 3.8 database sub process as detailed in Table S13 |
|             |                      | Silicon oil container           | Modelled from Ecoinvent v 3.8 database sub process as detailed in Table S6  |
|             |                      | Funnel                          | Modelled from Ecoinvent v 3.8 database sub process as detailed in Table S8  |

|             |                       |                               |                               |                                                                             |
|-------------|-----------------------|-------------------------------|-------------------------------|-----------------------------------------------------------------------------|
|             |                       | Filter                        | 3.18*10 <sup>-6</sup> p       | Modelled from Ecoinvent v 3.8 database sub process as detailed in Table S7  |
|             |                       | Fitting reflux condenser      | 8.69*10 <sup>-4</sup> p       | Modelled from Ecoinvent v 3.8 database sub process as detailed in Table S12 |
|             |                       | Rubber tube                   | 1.67*10 <sup>-2</sup> p       | Modelled from Ecoinvent v 3.8 database sub process as detailed in Table S14 |
|             |                       | Activated carbon air filter   | 1.35*10 <sup>-3</sup> p       | Modelled from Ecoinvent v 3.8 database sub process as detailed in Table S4  |
|             |                       | Aspiration system             | 3.38*10 <sup>-4</sup> p       | Modelled from Ecoinvent v 3.8 database sub process as detailed in Table S3  |
| Transport   |                       | Transport for large equipment | 5.63*10 <sup>-2</sup> tkm     | Ecoinvent v 3.8 <sup>8</sup>                                                |
|             |                       | Transport for raw materials   | 8.58 kgkm                     | Ecoinvent v 3.8 <sup>9</sup>                                                |
|             |                       | Transport for small equipment | 1.91*10 <sup>-1</sup> kgkm    | Ecoinvent v 3.8 <sup>10</sup>                                               |
| Energy      | Electric energy       |                               | 28.25 kJ                      | Ecoinvent v 3.8 <sup>11</sup>                                               |
|             |                       |                               | 3168 Wh                       | Ecoinvent v 3.8 <sup>12</sup>                                               |
|             |                       |                               | 11.37 kJ                      | Ecoinvent v 3.8 <sup>13</sup>                                               |
|             |                       |                               | 630 Wh                        | Ecoinvent v 3.8 <sup>14</sup>                                               |
|             |                       |                               | 500 Wh                        | Ecoinvent v 3.8 <sup>15</sup>                                               |
|             |                       |                               | 2.26 kWh                      | Ecoinvent v 3.8 <sup>16</sup>                                               |
| Output      | Air emission          | ACN                           | 4.28*10 <sup>-5</sup> g       | SimaPro airborne emission substance list <sup>17</sup>                      |
|             |                       | HBr                           | 3.83*10 <sup>-3</sup> g       | SimaPro airborne emission substance list <sup>18</sup>                      |
|             |                       | H <sub>2</sub> O              | 1.15*10 <sup>-6</sup> g       | SimaPro airborne emission substance list <sup>19</sup>                      |
|             |                       | Diethyl ether                 | 5.291*10 <sup>-4</sup> g      | SimaPro airborne emission substance list <sup>20</sup>                      |
| End of life | Spent solvent mixture | 42.065 g                      | Ecoinvent v 3.8 <sup>21</sup> |                                                                             |

| Incineration                                                                                                                                                                                                                                                                                                                                                                                                       | 1.914g | Ecoinvent v 3.8 <sup>22</sup> |
|--------------------------------------------------------------------------------------------------------------------------------------------------------------------------------------------------------------------------------------------------------------------------------------------------------------------------------------------------------------------------------------------------------------------|--------|-------------------------------|
| <sup>1</sup> The Ecoinvent process used was: Acetonitrile {RER}   Sohio process   APOS, U.                                                                                                                                                                                                                                                                                                                         |        |                               |
| <sup>2</sup> The Ecoinvent process used was: Potassium carbonate {RER}   oxidation of manganese dioxide   APOS, U.                                                                                                                                                                                                                                                                                                 |        |                               |
| <sup>3</sup> The Ecoinvent process used was: Potassium chloride {RER}   potassium chloride production   APOS, U. During the experimental work potassium iodide was used. Since it is not present in the database, potassium chloride was used as proxy. In this specific run, this reagent was not used, for this reason its quantity is zero in this table.                                                       |        |                               |
| <sup>4</sup> The Ecoinvent process used was: Water, deionised {Europe without Switzerland}   water production, deionised   APOS, U.                                                                                                                                                                                                                                                                                |        |                               |
| <sup>5</sup> The Ecoinvent process used was: Diethyl ether, without water, in 99.95% solution state {RER}   ethylene hydration   APOS, U.                                                                                                                                                                                                                                                                          |        |                               |
| <sup>6</sup> The Ecoinvent process used was: Magnesium sulfate {RER}   production   APOS, U.                                                                                                                                                                                                                                                                                                                       |        |                               |
| <sup>7</sup> The Ecoinvent process used was: Silicone product {RER}   production   APOS, U.                                                                                                                                                                                                                                                                                                                        |        |                               |
| <sup>8</sup> Transport of large equipment (aspiration system and activated air carbon filter). The Ecoinvent process used was: Transport, freight, lorry 16-32 metric ton, EURO6 {RER}   transport, freight, lorry 16-32 metric ton, EURO6   APOS, U. An average distance of 100km was considered.                                                                                                                 |        |                               |
| <sup>9</sup> Transport for reagents. The Ecoinvent process used was: Transport, freight, lorry 3.5-7.5 metric ton, EURO6 {RER}   transport, freight, lorry 3.5-7.5 metric ton, EURO6   APOS, U. An average distance of 100km was considered.                                                                                                                                                                       |        |                               |
| <sup>10</sup> Transport for small laboratory equipment. The Ecoinvent process used was: Transport, freight, lorry 3.5-7.5 metric ton, EURO6 {RER}   transport, freight, lorry 3.5-7.5 metric ton, EURO6   APOS, U. An average distance of 100 km was considered.                                                                                                                                                   |        |                               |
| <sup>11</sup> Electric energy necessary for the heating up to 100°C of the reaction mixture containing ACN, Vanillin and Bromobutane. It is calculated using the expression $m \cdot C_p \cdot DT$ , considering the specific heat in J/kg°C for each of the substances. The Ecoinvent process used was: Electricity, low voltage {IT}   electricity voltage transformation from medium to low voltage   APOS, U.  |        |                               |
| <sup>12</sup> Electric energy necessary to maintain the heating at 100°C of the reaction mixture for 24 hours. It is calculated using the Fourier Equation. The Ecoinvent process used was: Electricity, low voltage {IT}   electricity voltage transformation from medium to low voltage   APOS, U.                                                                                                               |        |                               |
| <sup>13</sup> Electric energy necessary to eliminate the remaining solvent (ACN) using the rotavapor. It is calculated as $H_{vap}ACN \cdot molACN$ , considering $H_{vap}ACN$ as its latent heat of vaporization (29.8 kJ/mol) and $molACN$ as the moles of the solvent. The Ecoinvent process used was: Electricity, low voltage {IT}   electricity voltage transformation from medium to low voltage   APOS, U. |        |                               |
| <sup>14</sup> Electric energy necessary to use the heating stirrer during the workup phase for 1 hour. It is calculated as $power \cdot time$ , considering 630W as the heating stirrer power. The Ecoinvent process used was: Electricity, low voltage {IT}   electricity voltage transformation from medium to low voltage   APOS, U.                                                                            |        |                               |
| <sup>15</sup> Electric energy necessary to use the rotavapor after the workup phase for 1 hour. It is calculated as $power \cdot time$ , considering 500W as the rotavapor power. The Ecoinvent process used was: Electricity, low voltage {IT}   electricity voltage transformation from medium to low voltage   APOS, U.                                                                                         |        |                               |
| <sup>16</sup> Electric energy necessary to the use of the aspiration system for the whole synthesis time, i.e. 27 h. The power was calculated by considering the air flow rate of 250 m <sup>3</sup> /h, a total load loss of 110.8076 kg/m <sup>2</sup> , and an efficiency of 90%: Electricity, low voltage {IT}   electricity voltage transformation from medium to low voltage   APOS, U.                      |        |                               |
| <sup>17</sup> Amount of ACN released into the atmosphere, as calculated by the formula reported in equation 4 of the main manuscript.                                                                                                                                                                                                                                                                              |        |                               |
| <sup>18</sup> Amount of HBr released into the atmosphere, as calculated by the formula reported in equation 4 of the main manuscript.                                                                                                                                                                                                                                                                              |        |                               |
| <sup>19</sup> Amount of Water released into the atmosphere, as calculated by the formula reported in equation 4 of the main manuscript.                                                                                                                                                                                                                                                                            |        |                               |
| <sup>20</sup> Amount of Diethyl ether released into the atmosphere, as calculated by the formula reported in equation 4 of the main manuscript.                                                                                                                                                                                                                                                                    |        |                               |
| <sup>21</sup> End of life of liquid waste, including ACN, Diethyl ether and water. The Ecoinvent process used was: Spent solvent mixture {Europe without Switzerland}   treatment of spent solvent mixture, hazardous waste incineration, with energy recovery   APOS, U.                                                                                                                                          |        |                               |
| <sup>22</sup> End of life of the solid waste recovered after the filtration following the first part of the synthesis. The Ecoinvent process used was: Hazardous waste, for incineration {RoW}   treatment of hazardous waste, hazardous waste incineration, with energy recovery   APOS, U.                                                                                                                       |        |                               |



**Table S37.** Contributions to the Life Cycle Inventory (LCI) for the synthesis of 0.11076 g of 4-butoxy-3-methoxybenzaldehyde. This is Reaction 14 (Run 19), carried in Acetonitrile as solvent with a reaction time of 16 hours, as reported in Table 1 in the main manuscript.

| Description |                      |                                 | Amount                  | Process Data Source                                                         |
|-------------|----------------------|---------------------------------|-------------------------|-----------------------------------------------------------------------------|
| Input       | Materials            | ACN                             | 15.66 g                 | Ecoinvent v 3.8 <sup>1</sup>                                                |
|             |                      | K <sub>2</sub> CO <sub>3</sub>  | 0.676 g                 | Ecoinvent v 3.8 <sup>2</sup>                                                |
|             |                      | KCl                             | 0.649 g                 | Ecoinvent v 3.8 <sup>3</sup>                                                |
|             |                      | Bromobutane                     | 0.679 g                 | Modelled from Ecoinvent v 3.8 database sub process as detailed in Table S23 |
|             |                      | Vanillin                        | 0.520 g                 | Modelled from Ecoinvent v 3.8 database sub process as detailed in Table S20 |
|             |                      | H <sub>2</sub> O                | 5 g                     | Ecoinvent v 3.8 <sup>4</sup>                                                |
|             |                      | Diethyl ether                   | 21.405 g                | Ecoinvent v 3.8 <sup>5</sup>                                                |
|             |                      | Mg <sub>2</sub> SO <sub>4</sub> | 1 g                     | Ecoinvent v 3.8 <sup>6</sup>                                                |
|             |                      | Silicon oil                     | 1.72*10 <sup>-2</sup> p | Ecoinvent v 3.8 <sup>7</sup>                                                |
|             | Equipment/<br>plants | Magnetic stirrer/heater         | 3.4*10 <sup>-4</sup> p  | Modelled from Ecoinvent v 3.8 database sub process as detailed in Table S18 |
|             |                      | Round bottom flask              | 6.25*10 <sup>-4</sup> p | Modelled from Ecoinvent v 3.8 database sub process as detailed in Table S15 |
|             |                      | Separatory funnel               | 2.33*10 <sup>-5</sup> p | Modelled from Ecoinvent v 3.8 database sub process as detailed in Table S9  |
|             |                      | Reflux condenser                | 5.90*10 <sup>-4</sup> p | Modelled from Ecoinvent v 3.8 database sub process as detailed in Table S13 |
|             |                      | Silicon oil container           | 9.03*10 <sup>-4</sup> p | Modelled from Ecoinvent v 3.8 database sub process as detailed in Table S6  |
|             |                      | Funnel                          | 2.90*10 <sup>-6</sup> p | Modelled from Ecoinvent v 3.8 database sub process as detailed in Table S8  |
|             |                      | Filter                          | 3.18*10 <sup>-6</sup> p | Modelled from Ecoinvent v 3.8 database                                      |

|             |                               |                           |                                                                                   |
|-------------|-------------------------------|---------------------------|-----------------------------------------------------------------------------------|
|             |                               |                           | sub process as detailed in Table S7                                               |
|             | Fitting reflux condenser      | $5.56 \cdot 10^{-4}$ p    | Modelled from Ecoinvent v 3.8 database sub process as detailed in Table S12       |
|             | Rubber tube                   | $1.11 \cdot 10^{-2}$ p    | Modelled from Ecoinvent v 3.8 database sub process as detailed in Table S14       |
|             | Activated carbon air filter   | $9.5 \cdot 10^{-4}$ p     | Modelled from Ecoinvent v 3.8 database sub process as detailed in Table S4        |
|             | Aspiration system             | $2.38 \cdot 10^{-4}$ p    | Modelled from Ecoinvent v 3.8 database sub process as detailed in Table S3        |
| Transport   | Transport for large equipment | $3.97 \cdot 10^{-2}$ tkm  | Ecoinvent v 3.8 <sup>8</sup>                                                      |
|             | Transport for raw materials   | 8.62 kgkm                 | Ecoinvent v 3.8 <sup>9</sup>                                                      |
|             | Transport for small equipment | $1.30 \cdot 10^{-1}$ kgkm | Ecoinvent v 3.8 <sup>10</sup>                                                     |
| Energy      | Electric energy               | 28.25 kJ                  | Ecoinvent v 3.8 <sup>11</sup>                                                     |
|             |                               | 2112 Wh                   | Ecoinvent v 3.8 <sup>12</sup>                                                     |
|             |                               | 11.37 kJ                  | Ecoinvent v 3.8 <sup>13</sup>                                                     |
|             |                               | 630 Wh                    | Ecoinvent v 3.8 <sup>14</sup>                                                     |
|             |                               | 500 Wh                    | Ecoinvent v 3.8 <sup>15</sup>                                                     |
|             |                               | 2.26 kWh                  | Ecoinvent v 3.8 <sup>16</sup>                                                     |
| Output      | Air emission                  | ACN                       | $4.28 \cdot 10^{-5}$ g<br>SimaPro airborne emission substance list <sup>17</sup>  |
|             |                               | HBr                       | $1.21 \cdot 10^{-3}$ g<br>SimaPro airborne emission substance list <sup>18</sup>  |
|             |                               | H <sub>2</sub> O          | $1.15 \cdot 10^{-6}$ g<br>SimaPro airborne emission substance list <sup>19</sup>  |
|             |                               | Diethyl ether             | $5.291 \cdot 10^{-4}$ g<br>SimaPro airborne emission substance list <sup>20</sup> |
| End of life | Spent solvent mixture         | 42.065 g                  | Ecoinvent v 3.8 <sup>21</sup>                                                     |
|             | Incineration                  | 2.326 g                   | Ecoinvent v 3.8 <sup>22</sup>                                                     |

<sup>1</sup>The Ecoinvent process used was: Acetonitrile {RER} | Sohio process | APOS, U.

- <sup>2</sup>The Ecoinvent process used was: Potassium carbonate {RER}| oxidation of manganese dioxide | APOS, U.
- <sup>3</sup>The Ecoinvent process used was: Potassium chloride {RER}| potassium chloride production | APOS, U. During the experimental work potassium iodide was used. Since it is not present in the database, potassium chloride was used as proxy.
- <sup>4</sup>The Ecoinvent process use was: Water, deionised {Europe without Switzerland}| water production, deionised | APOS, U.
- <sup>5</sup>The Ecoinvent process used was: Diethyl ether, without water, in 99.95% solution state {RER}| ethylene hydration | APOS, U.
- <sup>6</sup>The Ecoinvent process used was: Magnesium sulfate {RER}| production | APOS, U.
- <sup>7</sup>The Ecoinvent process used was: Silicone product {RER}| production | APOS, U.
- <sup>8</sup>Transport of large equipment (aspiration system and activated air carbon filter). The Ecoinvet process used was: Transport, freight, lorry 16-32 metric ton, EURO6 {RER}| transport, freight, lorry 16-32 metric ton, EURO6 | APOS, U. An average distance of 100km was considered.
- <sup>9</sup>Transport for reagents. The Ecoinvent process used was: Transport, freight, lorry 3.5-7.5 metric ton, EURO6 {RER}| transport, freight, lorry 3.5-7.5 metric ton, EURO6 | APOS, U. An average distance of 100km was considered.
- <sup>10</sup>Transport for small laboratory equipment. The Ecoinvent process used was: Transport, freight, lorry 3.5-7.5 metric ton, EURO6 {RER}| transport, freight, lorry 3.5-7.5 metric ton, EURO6 | APOS, U. An average distance of 100 km was considered.
- <sup>11</sup>Electric energy necessary for the heating up to 100°C of the reaction mixture containing ACN, Vanillin and Bromobutane. It is calculated using the expression  $m \cdot C_p \cdot DT$ , considering the specific heat in J/kg°C for each of the substances. The Ecoinvent process used was: Electricity, low voltage {IT}| electricity voltage transformation from medium to low voltage | APOS, U.
- <sup>12</sup>Electric energy necessary to maintain the heating at 100°C of the reaction mixture for 16 hours. It is calculated using the Fourier Equation. The Ecoinvent process used was: Electricity, low voltage {IT}| electricity voltage transformation from medium to low voltage | APOS, U.
- <sup>13</sup>Electric energy necessary to eliminate the remaining solvent (ACN) using the rotavapor. It is calculated as  $H_{vap}ACN \cdot molACN$ , considering  $H_{vap}ACN$  as its latent heat of vaporization (29.8 kJ/mol) and  $molACN$  as the moles of the solvent. The Ecoinvent process used was: Electricity, low voltage {IT}| electricity voltage transformation from medium to low voltage | APOS, U.
- <sup>14</sup>Electric energy necessary to use the heating stirrer during the workup phase for 1 hour. It is calculated as power\*time, considering 630W as the heating stirrer power. The Ecoinvent process used was: Electricity, low voltage {IT}| electricity voltage transformation from medium to low voltage | APOS, U.
- <sup>15</sup>Electric energy necessary to use the rotavapor after the workup phase for 1 hour. It is calculated as power\*time, considering 500W as the rotavapor power. The Ecoinvent process used was: Electricity, low voltage {IT}| electricity voltage transformation from medium to low voltage | APOS, U.
- <sup>16</sup>Electric energy necessary to the use of the aspiration system for the whole synthesis time, i.e. 19 h. The power was calculated by considering the air flow rate of 250 m<sup>3</sup>/h, a total load loss of 110.8076 kg/m<sup>2</sup>, and an efficiency of 90%: Electricity, low voltage {IT}| electricity voltage transformation from medium to low voltage | APOS, U.
- <sup>17</sup>Amount of ACN released into the atmosphere, as calculated by the formula reported in equation 4 of the main manuscript.
- <sup>18</sup>Amount of HBr released into the atmosphere, as calculated by the formula reported in equation 4 of the main manuscript.
- <sup>19</sup>Amount of Water released into the atmosphere, as calculated by the formula reported in equation 4 of the main manuscript.
- <sup>20</sup>Amount of Diethyl ether released into the atmosphere, as calculated by the formula reported in equation 4 of the main manuscript.
- <sup>21</sup>End of life of liquid waste, including ACN, Diethyl ether and water. The Ecoinvent process used was: Spent solvent mixture {Europe without Switzerland}| treatment of spent solvent mixture, hazardous waste incineration, with energy recovery | APOS, U.
- <sup>22</sup>End of life of the solid waste recovered after the filtration following the first part of the synthesis. The Ecoinvent process used was: Hazardous waste, for incineration {RoW}| treatment of hazardous waste, hazardous waste incineration, with energy recovery | APOS, U.

**Table S38.** Contributions to the Life Cycle Inventory (LCI) for the synthesis of 0.32881 g of 4-butoxy-3-methoxybenzaldehyde. This is Reaction 15 (Run 10), carried in DMF as solvent with a reaction time of 24 hours, as reported in Table 1 in the main manuscript.

| Description |                      | Amount                          | Process Data Source                                                         |
|-------------|----------------------|---------------------------------|-----------------------------------------------------------------------------|
| Input       | Materials            | DMF                             | Ecoinvent v 3.8 <sup>1</sup>                                                |
|             |                      | K <sub>2</sub> CO <sub>3</sub>  | Ecoinvent v 3.8 <sup>2</sup>                                                |
|             |                      | KCl                             | Ecoinvent v 3.8 <sup>3</sup>                                                |
|             |                      | Bromobutane                     | Modelled from Ecoinvent v 3.8 database sub process as detailed in Table S23 |
|             |                      | Vanillin                        | Modelled from Ecoinvent v 3.8 database sub process as detailed in Table S20 |
|             |                      | H <sub>2</sub> O                | Ecoinvent v 3.8 <sup>4</sup>                                                |
|             |                      | Diethyl ether                   | Ecoinvent v 3.8 <sup>5</sup>                                                |
|             | Equipment/<br>plants | Mg <sub>2</sub> SO <sub>4</sub> | Ecoinvent v 3.8 <sup>6</sup>                                                |
|             |                      | Silicon oil                     | Ecoinvent v 3.8 <sup>7</sup>                                                |
|             |                      | Magnetic stirrer/heater         | Modelled from Ecoinvent v 3.8 database sub process as detailed in Table S18 |
|             |                      | Round bottom flask              | Modelled from Ecoinvent v 3.8 database sub process as detailed in Table S15 |
|             |                      | Separatory funnel               | Modelled from Ecoinvent v 3.8 database sub process as detailed in Table S9  |
|             |                      | Reflux condenser                | Modelled from Ecoinvent v 3.8 database sub process as detailed in Table S13 |
|             |                      | Silicon oil container           | Modelled from Ecoinvent v 3.8 database sub process as detailed in Table S6  |
|             |                      | Funnel                          | Modelled from Ecoinvent v 3.8 database sub process as detailed in Table S8  |
|             |                      | Filter                          | Modelled from Ecoinvent v 3.8 database                                      |

|                             |                               |                            |                                                                             |                                                        |
|-----------------------------|-------------------------------|----------------------------|-----------------------------------------------------------------------------|--------------------------------------------------------|
|                             |                               |                            | sub process as detailed in Table S7                                         |                                                        |
| Fitting reflux condenser    |                               | 8.68*10 <sup>-4</sup> p    | Modelled from Ecoinvent v 3.8 database sub process as detailed in Table S12 |                                                        |
| Rubber tube                 |                               | 1.67*10 <sup>-3</sup> p    | Modelled from Ecoinvent v 3.8 database sub process as detailed in Table S14 |                                                        |
| Activated carbon air filter |                               | 1.35*10 <sup>-3</sup> p    | Modelled from Ecoinvent v 3.8 database sub process as detailed in Table S4  |                                                        |
| Aspiration system           |                               | 3.38*10 <sup>-4</sup> p    | Modelled from Ecoinvent v 3.8 database sub process as detailed in Table S3  |                                                        |
| Transport                   | Transport for large equipment | 5.63*10 <sup>-2</sup> tkm  | Ecoinvent v 3.8 <sup>8</sup>                                                |                                                        |
|                             | Transport for raw materials   | 6.34 kgkm                  | Ecoinvent v 3.8 <sup>9</sup>                                                |                                                        |
|                             | Transport for small equipment | 1.91*10 <sup>-1</sup> kgkm | Ecoinvent v 3.8 <sup>10</sup>                                               |                                                        |
| Energy                      | Electric energy               | 42.90 kJ                   | Ecoinvent v 3.8 <sup>11</sup>                                               |                                                        |
|                             |                               | 4320 Wh                    | Ecoinvent v 3.8 <sup>12</sup>                                               |                                                        |
|                             |                               | 3.015 kJ                   | Ecoinvent v 3.8 <sup>13</sup>                                               |                                                        |
|                             |                               | 630 Wh                     | Ecoinvent v 3.8 <sup>14</sup>                                               |                                                        |
|                             |                               | 500 Wh                     | Ecoinvent v 3.8 <sup>15</sup>                                               |                                                        |
|                             |                               | 2.26 kWh                   | Ecoinvent v 3.8 <sup>16</sup>                                               |                                                        |
| Output                      | Air emission                  | DMF                        | 7.28*10 <sup>-7</sup> g                                                     | SimaPro airborne emission substance list <sup>17</sup> |
|                             |                               | HBr                        | 5.25*10 <sup>-3</sup> g                                                     | SimaPro airborne emission substance list <sup>18</sup> |
|                             |                               | H <sub>2</sub> O           | 1.15*10 <sup>-6</sup> g                                                     | SimaPro airborne emission substance list <sup>19</sup> |
|                             |                               | Diethyl ether              | 5.291*10 <sup>-4</sup> g                                                    | SimaPro airborne emission substance list <sup>20</sup> |
| End of life                 | Spent solvent mixture         | 31.125 g                   | Ecoinvent v 3.8 <sup>21</sup>                                               |                                                        |
|                             | Incineration                  | 1.452 g                    | Ecoinvent v 3.8 <sup>22</sup>                                               |                                                        |

<sup>1</sup>The Ecoinvent process used was: N,N-dimethylformamide {RER} | production | APOS, U.

- <sup>2</sup>The Ecoinvent process used was: Potassium carbonate {RER}| oxidation of manganese dioxide | APOS, U.
- <sup>3</sup>The Ecoinvent process used was: Potassium chloride {RER}| potassium chloride production | APOS, U. During the experimental work potassium iodide was used. Since it is not present in the database, potassium chloride was used as proxy. In this specific run, this reagent was not used, for this reason its quantity is zero in this table.
- <sup>4</sup>The Ecoinvent process use was: Water, deionised {Europe without Switzerland}| water production, deionised | APOS, U.
- <sup>5</sup>The Ecoinvent process used was: Diethyl ether, without water, in 99.95% solution state {RER}| ethylene hydration | APOS, U.
- <sup>6</sup>The Ecoinvent process used was: Magnesium sulfate {RER}| production | APOS, U.
- <sup>7</sup>The Ecoinvent process used was: Silicone product {RER}| production | APOS, U.
- <sup>8</sup>Transport of large equipment (aspiration system and activated air carbon filter). The Ecoinvent process used was: Transport, freight, lorry 16-32 metric ton, EURO6 {RER}| transport, freight, lorry 16-32 metric ton, EURO6 | APOS, U. An average distance of 100km was considered.
- <sup>9</sup>Transport for reagents. The Ecoinvent process used was: Transport, freight, lorry 3.5-7.5 metric ton, EURO6 {RER}| transport, freight, lorry 3.5-7.5 metric ton, EURO6 | APOS, U. An average distance of 100km was considered.
- <sup>10</sup>Transport for small laboratory equipment. The Ecoinvent process used was: Transport, freight, lorry 3.5-7.5 metric ton, EURO6 {RER}| transport, freight, lorry 3.5-7.5 metric ton, EURO6 | APOS, U. An average distance of 100 km was considered.
- <sup>11</sup>Electric energy necessary for the heating up to 100°C of the reaction mixture containing DMF, Vanillin and Bromobutane. It is calculated using the expression  $m \cdot C_p \cdot DT$ , considering the specific heat in J/kg°C for each of the substances. The Ecoinvent process used was: Electricity, low voltage {IT}| electricity voltage transformation from medium to low voltage | APOS, U.
- <sup>12</sup>Electric energy necessary to maintain the heating at 100°C of the reaction mixture for 24 hours. It is calculated using the Fourier Equation. The Ecoinvent process used was: Electricity, low voltage {IT}| electricity voltage transformation from medium to low voltage | APOS, U.
- <sup>13</sup>Electric energy necessary to eliminate the remaining solvent (DMF) using the rotavapor. It is calculated as  $H_{vap}DMF \cdot molDMF$ , considering  $H_{vap}DMF$  as its latent heat of vaporization (46.7 kJ/mol) and  $molDMF$  as the moles of the solvent. The Ecoinvent process used was: Electricity, low voltage {IT}| electricity voltage transformation from medium to low voltage | APOS, U.
- <sup>14</sup>Electric energy necessary to use the heating stirrer during the workup phase for 1 hour. It is calculated as power\*time, considering 630W as the heating stirrer power. The Ecoinvent process used was: Electricity, low voltage {IT}| electricity voltage transformation from medium to low voltage | APOS, U.
- <sup>15</sup>Electric energy necessary to use the rotavapor after the workup phase for 1 hour. It is calculated as power\*time, considering 500W as the rotavapor power. The Ecoinvent process used was: Electricity, low voltage {IT}| electricity voltage transformation from medium to low voltage | APOS, U.
- <sup>16</sup>Electric energy necessary to the use of the aspiration system for the whole synthesis time, i.e. 27 h. The power was calculated by considering the air flow rate of 250 m<sup>3</sup>/h, a total load loss of 110.8076 kg/m<sup>2</sup>, and an efficiency of 90%: Electricity, low voltage {IT}| electricity voltage transformation from medium to low voltage | APOS, U.
- <sup>17</sup>Amount of DMF released into the atmosphere, as calculated by the formula reported in equation 4 of the main manuscript.
- <sup>18</sup>Amount of HBr released into the atmosphere, as calculated by the formula reported in equation 4 of the main manuscript.
- <sup>19</sup>Amount of Water released into the atmosphere, as calculated by the formula reported in equation 4 of the main manuscript.
- <sup>20</sup>Amount of Diethyl ether released into the atmosphere, as calculated by the formula reported in equation 4 of the main manuscript.
- <sup>21</sup>End of life of liquid waste, including DMF, Diethyl ether and water. The Ecoinvent process used was: Spent solvent mixture {Europe without Switzerland}| treatment of spent solvent mixture, hazardous waste incineration, with energy recovery | APOS, U.
- <sup>22</sup>End of life of the solid waste recovered after the filtration following the first part of the synthesis. The Ecoinvent process used was: Hazardous waste, for incineration {RoW}| treatment of hazardous waste, hazardous waste incineration, with energy recovery | APOS, U.

**Table S39.** Contributions to the Life Cycle Inventory (LCI) for the synthesis of 0.11867 g of 4-butoxy-3-methoxybenzaldehyde. This is Reaction 16 (Run 18), carried in Acetonitrile as solvent with a reaction time of 16 hours, as reported in Table 1 in the main manuscript.

| Description |                      |                                 | Amount                  | Process Data Source                                                         |
|-------------|----------------------|---------------------------------|-------------------------|-----------------------------------------------------------------------------|
| Input       | Materials            | ACN                             | 15.66 g                 | Ecoinvent v 3.8 <sup>1</sup>                                                |
|             |                      | K <sub>2</sub> CO <sub>3</sub>  | 0.683 g                 | Ecoinvent v 3.8 <sup>2</sup>                                                |
|             |                      | KCl                             | 0.543 g                 | Ecoinvent v 3.8 <sup>3</sup>                                                |
|             |                      | Bromobutane                     | 0.687 g                 | Modelled from Ecoinvent v 3.8 database sub process as detailed in Table S23 |
|             |                      | Vanillin                        | 0.503 g                 | Modelled from Ecoinvent v 3.8 database sub process as detailed in Table S20 |
|             |                      | H <sub>2</sub> O                | 5 g                     | Ecoinvent v 3.8 <sup>4</sup>                                                |
|             |                      | Diethyl ether                   | 21.405 g                | Ecoinvent v 3.8 <sup>5</sup>                                                |
|             |                      | Mg <sub>2</sub> SO <sub>4</sub> | 1 g                     | Ecoinvent v 3.8 <sup>6</sup>                                                |
|             |                      | Silicon oil                     | 1.72*10 <sup>-2</sup> p | Ecoinvent v 3.8 <sup>7</sup>                                                |
|             | Equipment/<br>plants | Magnetic stirrer/heater         | 3.4*10 <sup>-4</sup> p  | Modelled from Ecoinvent v 3.8 database sub process as detailed in Table S18 |
|             |                      | Round bottom flask              | 6.25*10 <sup>-4</sup> p | Modelled from Ecoinvent v 3.8 database sub process as detailed in Table S15 |
|             |                      | Separatory funnel               | 2.33*10 <sup>-5</sup> p | Modelled from Ecoinvent v 3.8 database sub process as detailed in Table S9  |
|             |                      | Reflux condenser                | 5.90*10 <sup>-4</sup> p | Modelled from Ecoinvent v 3.8 database sub process as detailed in Table S13 |
|             |                      | Silicon oil container           | 6.25*10 <sup>-4</sup> p | Modelled from Ecoinvent v 3.8 database sub process as detailed in Table S6  |
|             |                      | Funnel                          | 2.90*10 <sup>-6</sup> p | Modelled from Ecoinvent v 3.8 database sub process as detailed in Table S8  |
|             |                      | Filter                          | 3.18*10 <sup>-6</sup> p | Modelled from Ecoinvent v 3.8 database                                      |

|             |                               |                           |                                                                                   |
|-------------|-------------------------------|---------------------------|-----------------------------------------------------------------------------------|
|             |                               |                           | sub process as detailed in Table S7                                               |
|             | Fitting reflux condenser      | $5.56 \cdot 10^{-4}$ p    | Modelled from Ecoinvent v 3.8 database sub process as detailed in Table S12       |
|             | Rubber tube                   | $1.11 \cdot 10^{-2}$ p    | Modelled from Ecoinvent v 3.8 database sub process as detailed in Table S14       |
|             | Activated carbon air filter   | $9.5 \cdot 10^{-4}$ p     | Modelled from Ecoinvent v 3.8 database sub process as detailed in Table S4        |
|             | Aspiration system             | $2.38 \cdot 10^{-4}$ p    | Modelled from Ecoinvent v 3.8 database sub process as detailed in Table S3        |
| Transport   | Transport for large equipment | $3.96 \cdot 10^{-2}$ tkm  | Ecoinvent v 3.8 <sup>8</sup>                                                      |
|             | Transport for raw materials   | 8.59 kgkm                 | Ecoinvent v 3.8 <sup>9</sup>                                                      |
|             | Transport for small equipment | $1.30 \cdot 10^{-1}$ kgkm | Ecoinvent v 3.8 <sup>10</sup>                                                     |
| Energy      | Electric energy               | 28.25 kJ                  | Ecoinvent v 3.8 <sup>11</sup>                                                     |
|             |                               | 2112 Wh                   | Ecoinvent v 3.8 <sup>12</sup>                                                     |
|             |                               | 11.37 kJ                  | Ecoinvent v 3.8 <sup>13</sup>                                                     |
|             |                               | 630 Wh                    | Ecoinvent v 3.8 <sup>14</sup>                                                     |
|             |                               | 500 Wh                    | Ecoinvent v 3.8 <sup>15</sup>                                                     |
|             |                               | 2.26 kWh                  | Ecoinvent v 3.8 <sup>16</sup>                                                     |
| Output      | Air emission                  | ACN                       | $4.28 \cdot 10^{-5}$ g<br>SimaPro airborne emission substance list <sup>17</sup>  |
|             |                               | HBr                       | $1.23 \cdot 10^{-3}$ g<br>SimaPro airborne emission substance list <sup>18</sup>  |
|             |                               | H <sub>2</sub> O          | $1.15 \cdot 10^{-6}$ g<br>SimaPro airborne emission substance list <sup>19</sup>  |
|             |                               | Diethyl ether             | $5.291 \cdot 10^{-4}$ g<br>SimaPro airborne emission substance list <sup>20</sup> |
| End of life | Spent solvent mixture         | 42.065 g                  | Ecoinvent v 3.8 <sup>21</sup>                                                     |
|             | Incineration                  | 2.223 g                   | Ecoinvent v 3.8 <sup>22</sup>                                                     |

<sup>1</sup>The Ecoinvent process used was: Acetonitrile {RER}| Sohio process | APOS, U.



- <sup>2</sup>The Ecoinvent process used was: Potassium carbonate {RER}| oxidation of manganese dioxide | APOS, U.
- <sup>3</sup>The Ecoinvent process used was: Potassium chloride {RER}| potassium chloride production | APOS, U. During the experimental work potassium iodide was used. Since it is not present in the database, potassium chloride was used as proxy.
- <sup>4</sup>The Ecoinvent process use was: Water, deionised {Europe without Switzerland}| water production, deionised | APOS, U.
- <sup>5</sup>The Ecoinvent process used was: Diethyl ether, without water, in 99.95% solution state {RER}| ethylene hydration | APOS, U.
- <sup>6</sup>The Ecoinvent process used was: Magnesium sulfate {RER}| production | APOS, U.
- <sup>7</sup>The Ecoinvent process used was: Silicone product {RER}| production | APOS, U.
- <sup>8</sup>Transport of large equipment (aspiration system and activated air carbon filter). The Ecoinvent process used was: Transport, freight, lorry 16-32 metric ton, EURO6 {RER}| transport, freight, lorry 16-32 metric ton, EURO6 | APOS, U. An average distance of 100km was considered.
- <sup>9</sup>Transport for reagents. The Ecoinvent process used was: Transport, freight, lorry 3.5-7.5 metric ton, EURO6 {RER}| transport, freight, lorry 3.5-7.5 metric ton, EURO6 | APOS, U. An average distance of 100km was considered.
- <sup>10</sup>Transport for small laboratory equipment. The Ecoinvent process used was: Transport, freight, lorry 3.5-7.5 metric ton, EURO6 {RER}| transport, freight, lorry 3.5-7.5 metric ton, EURO6 | APOS, U. An average distance of 100 km was considered.
- <sup>11</sup>Electric energy necessary for the heating up to 100°C of the reaction mixture containing ACN, Vanillin and Bromobutane. It is calculated using the expression  $m \cdot C_p \cdot DT$ , considering the specific heat in J/kg°C for each of the substances. The Ecoinvent process used was: Electricity, low voltage {IT}| electricity voltage transformation from medium to low voltage | APOS, U.
- <sup>12</sup>Electric energy necessary to maintain the heating at 100°C of the reaction mixture for 16 hours. It is calculated using the Fourier Equation. The Ecoinvent process used was: Electricity, low voltage {IT}| electricity voltage transformation from medium to low voltage | APOS, U.
- <sup>13</sup>Electric energy necessary to eliminate the remaining solvent (ACN) using the rotavapor. It is calculated as  $H_{vap}ACN \cdot molACN$ , considering  $H_{vap}ACN$  as its latent heat of vaporization (29.8 kJ/mol) and  $molACN$  as the moles of the solvent. The Ecoinvent process used was: Electricity, low voltage {IT}| electricity voltage transformation from medium to low voltage | APOS, U.
- <sup>14</sup>Electric energy necessary to use the heating stirrer during the workup phase for 1 hour. It is calculated as power\*time, considering 630W as the heating stirrer power. The Ecoinvent process used was: Electricity, low voltage {IT}| electricity voltage transformation from medium to low voltage | APOS, U.
- <sup>15</sup>Electric energy necessary to use the rotavapor after the workup phase for 1 hour. It is calculated as power\*time, considering 500W as the rotavapor power. The Ecoinvent process used was: Electricity, low voltage {IT}| electricity voltage transformation from medium to low voltage | APOS, U.
- <sup>16</sup>Electric energy necessary to the use of the aspiration system for the whole synthesis time, i.e. 19 h. The power was calculated by considering the air flow rate of 250 m<sup>3</sup>/h, a total load loss of 110.8076 kg/m<sup>2</sup>, and an efficiency of 90%: Electricity, low voltage {IT}| electricity voltage transformation from medium to low voltage | APOS, U.
- <sup>17</sup>Amount of ACN released into the atmosphere, as calculated by the formula reported in equation 4 of the main manuscript.
- <sup>18</sup>Amount of HBr released into the atmosphere, as calculated by the formula reported in equation 4 of the main manuscript.
- <sup>19</sup>Amount of Water released into the atmosphere, as calculated by the formula reported in equation 4 of the main manuscript.
- <sup>20</sup>Amount of Diethyl ether released into the atmosphere, as calculated by the formula reported in equation 4 of the main manuscript.
- <sup>21</sup>End of life of liquid waste, including ACN, Diethyl ether and water. The Ecoinvent process used was: Spent solvent mixture {Europe without Switzerland}| treatment of spent solvent mixture, hazardous waste incineration, with energy recovery | APOS, U.
- <sup>22</sup>End of life of the solid waste recovered after the filtration following the first part of the synthesis. The Ecoinvent process used was: Hazardous waste, for incineration {RoW}| treatment of hazardous waste, hazardous waste incineration, with energy recovery | APOS, U.

**Table S40.** Contributions to the Life Cycle Inventory (LCI) for the synthesis of 0.31514 g of 4-butoxy-3-methoxybenzaldehyde. This is Reaction 17 (Run 2), carried in Acetone as solvent with a reaction time of 8 hours, as reported in Table 1 in the main manuscript.

| Description |                      |                                 | Amount                  | Process Data Source                                                         |
|-------------|----------------------|---------------------------------|-------------------------|-----------------------------------------------------------------------------|
| Input       | Materials            | Acetone                         | 15.68 g                 | Ecoinvent v 3.8 <sup>1</sup>                                                |
|             |                      | K <sub>2</sub> CO <sub>3</sub>  | 0.458 g                 | Ecoinvent v 3.8 <sup>2</sup>                                                |
|             |                      | KCl                             | 1.123 g                 | Ecoinvent v 3.8 <sup>3</sup>                                                |
|             |                      | Bromobutane                     | 0.947 g                 | Modelled from Ecoinvent v 3.8 database sub process as detailed in Table S23 |
|             |                      | Vanillin                        | 0.512 g                 | Modelled from Ecoinvent v 3.8 database sub process as detailed in Table S20 |
|             |                      | H <sub>2</sub> O                | 5 g                     | Ecoinvent v 3.8 <sup>4</sup>                                                |
|             |                      | Diethyl ether                   | 21.405 g                | Ecoinvent v 3.8 <sup>5</sup>                                                |
|             |                      | Mg <sub>2</sub> SO <sub>4</sub> | 1 g                     | Ecoinvent v 3.8 <sup>6</sup>                                                |
|             |                      | Silicon oil                     | 1.72*10 <sup>-2</sup> p | Ecoinvent v 3.8 <sup>7</sup>                                                |
|             | Equipment/<br>plants | Magnetic stirrer/heater         | 1.8*10 <sup>-4</sup> p  | Modelled from Ecoinvent v 3.8 database sub process as detailed in Table S18 |
|             |                      | Round bottom flask              | 3.47*10 <sup>-4</sup> p | Modelled from Ecoinvent v 3.8 database sub process as detailed in Table S15 |
|             |                      | Separatory funnel               | 2.33*10 <sup>-5</sup> p | Modelled from Ecoinvent v 3.8 database sub process as detailed in Table S9  |
|             |                      | Reflux condenser                | 3.12*10 <sup>-4</sup> p | Modelled from Ecoinvent v 3.8 database sub process as detailed in Table S13 |
|             |                      | Silicon oil container           | 3.47*10 <sup>-4</sup> p | Modelled from Ecoinvent v 3.8 database sub process as detailed in Table S6  |
|             |                      | Funnel                          | 2.90*10 <sup>-6</sup> p | Modelled from Ecoinvent v 3.8 database sub process as detailed in Table S8  |
|             |                      | Filter                          | 3.18*10 <sup>-6</sup> p | Modelled from Ecoinvent v 3.8 database                                      |
|             |                      |                                 |                         |                                                                             |

|                             |                               |                            |                                                                             |                                                        |
|-----------------------------|-------------------------------|----------------------------|-----------------------------------------------------------------------------|--------------------------------------------------------|
|                             |                               |                            | sub process as detailed in Table S7                                         |                                                        |
| Fitting reflux condenser    |                               | 2.78*10 <sup>-4</sup> p    | Modelled from Ecoinvent v 3.8 database sub process as detailed in Table S12 |                                                        |
| Rubber tube                 |                               | 5.56*10 <sup>-3</sup> p    | Modelled from Ecoinvent v 3.8 database sub process as detailed in Table S14 |                                                        |
| Activated carbon air filter |                               | 5.5*10 <sup>-4</sup> p     | Modelled from Ecoinvent v 3.8 database sub process as detailed in Table S4  |                                                        |
| Aspiration system           |                               | 1.38*10 <sup>-4</sup> p    | Modelled from Ecoinvent v 3.8 database sub process as detailed in Table S3  |                                                        |
| Transport                   | Transport for large equipment | 2.29*10 <sup>-2</sup> tkm  | Ecoinvent v 3.8 <sup>8</sup>                                                |                                                        |
|                             | Transport for raw materials   | 8.72 kgkm                  | Ecoinvent v 3.8 <sup>9</sup>                                                |                                                        |
|                             | Transport for small equipment | 6.88*10 <sup>-2</sup> kgkm | Ecoinvent v 3.8 <sup>10</sup>                                               |                                                        |
| Energy                      | Electric energy               | 11.40 kJ                   | Ecoinvent v 3.8 <sup>11</sup>                                               |                                                        |
|                             |                               | 480 Wh                     | Ecoinvent v 3.8 <sup>12</sup>                                               |                                                        |
|                             |                               | 8.64 kJ                    | Ecoinvent v 3.8 <sup>13</sup>                                               |                                                        |
|                             |                               | 630 Wh                     | Ecoinvent v 3.8 <sup>14</sup>                                               |                                                        |
|                             |                               | 500 Wh                     | Ecoinvent v 3.8 <sup>15</sup>                                               |                                                        |
|                             |                               | 0.92 kWh                   | Ecoinvent v 3.8 <sup>16</sup>                                               |                                                        |
| Output                      | Air emission                  | Acetone                    | 1.44*10 <sup>-4</sup> g                                                     | SimaPro airborne emission substance list <sup>17</sup> |
|                             |                               | HBr                        | 6.62*10 <sup>-3</sup> g                                                     | SimaPro airborne emission substance list <sup>18</sup> |
|                             |                               | H <sub>2</sub> O           | 1.15*10 <sup>-6</sup> g                                                     | SimaPro airborne emission substance list <sup>19</sup> |
|                             |                               | Diethyl ether              | 5.29*10 <sup>-4</sup> g                                                     | SimaPro airborne emission substance list <sup>20</sup> |
| End of life                 | Spent solvent mixture         | 42.085 g                   | Ecoinvent v 3.8 <sup>21</sup>                                               |                                                        |
|                             | Incineration                  | 2.581 g                    | Ecoinvent v 3.8 <sup>22</sup>                                               |                                                        |

<sup>1</sup>The Ecoinvent process used was: Acetone, liquid {RER}| production | APOS, U

- <sup>2</sup>The Ecoinvent process used was: Potassium carbonate {RER}| oxidation of manganese dioxide | APOS, U.
- <sup>3</sup>The Ecoinvent process used was: Potassium chloride {RER}| potassium chloride production | APOS, U. During the experimental work potassium iodide was used. Since it is not present in the database, potassium chloride was used as proxy.
- <sup>4</sup>The Ecoinvent process use was: Water, deionised {Europe without Switzerland}| water production, deionised | APOS, U.
- <sup>5</sup>The Ecoinvent process used was: Diethyl ether, without water, in 99.95% solution state {RER}| ethylene hydration | APOS, U.
- <sup>6</sup>The Ecoinvent process used was: Magnesium sulfate {RER}| production | APOS, U.
- <sup>7</sup>The Ecoinvent process used was: Silicone product {RER}| production | APOS, U.
- <sup>8</sup>Transport of large equipment (aspiration system and activated air carbon filter). The Ecoinvet process used was: Transport, freight, lorry 16-32 metric ton, EURO6 {RER}| transport, freight, lorry 16-32 metric ton, EURO6 | APOS, U. An average distance of 100km was considered.
- <sup>9</sup>Transport for reagents. The Ecoinvent process used was: Transport, freight, lorry 3.5-7.5 metric ton, EURO6 {RER}| transport, freight, lorry 3.5-7.5 metric ton, EURO6 | APOS, U. An average distance of 100km was considered.
- <sup>10</sup>Transport for small laboratory equipment. The Ecoinvent process used was: Transport, freight, lorry 3.5-7.5 metric ton, EURO6 {RER}| transport, freight, lorry 3.5-7.5 metric ton, EURO6 | APOS, U. An average distance of 100 km was considered.
- <sup>11</sup>Electric energy necessary for the heating up to 100°C of the reaction mixture containing Acetone, Vanillin and Bromobutane. It is calculated using the expression  $m \cdot C_p \cdot \Delta T$ , considering the specific heat in J/kg°C for each of the substances. The Ecoinvent process used was: Electricity, low voltage {IT}| electricity voltage transformation from medium to low voltage | APOS, U.
- <sup>12</sup>Electric energy necessary to maintain the heating at 100°C of the reaction mixture for 8 hours. It is calculated using the Fourier Equation. The Ecoinvent process used was: Electricity, low voltage {IT}| electricity voltage transformation from medium to low voltage | APOS, U.
- <sup>13</sup>Electric energy necessary to eliminate the remaining solvent (ACN) using the rotavapor. It is calculated as  $H_{vap} \text{Acetone} \cdot \text{molAcetone}$ , considering  $H_{vap} \text{Acetone}$  as its latent heat of vaporization (32 kJ/mol) and  $\text{molAcetone}$  as the moles of the solvent. The Ecoinvent process used was: Electricity, low voltage {IT}| electricity voltage transformation from medium to low voltage | APOS, U.
- <sup>14</sup>Electric energy necessary to use the heating stirrer during the workup phase for 1 hour. It is calculated as  $\text{power} \cdot \text{time}$ , considering 630W as the heating stirrer power. The Ecoinvent process used was: Electricity, low voltage {IT}| electricity voltage transformation from medium to low voltage | APOS, U.
- <sup>15</sup>Electric energy necessary to use the rotavapor after the workup phase for 1 hour. It is calculated as  $\text{power} \cdot \text{time}$ , considering 500W as the rotavapor power. The Ecoinvent process used was: Electricity, low voltage {IT}| electricity voltage transformation from medium to low voltage | APOS, U.
- <sup>16</sup>Electric energy necessary to the use of the aspiration system for the whole synthesis time, i.e. 11 h. The power was calculated by considering the air flow rate of 250 m<sup>3</sup>/h, a total load loss of 110.8076 kg/m<sup>2</sup>, and an efficiency of 90%: Electricity, low voltage {IT}| electricity voltage transformation from medium to low voltage | APOS, U.
- <sup>17</sup>Amount of Acetone released into the atmosphere, as calculated by the formula reported in equation 4 of the main manuscript.
- <sup>18</sup>Amount of HBr released into the atmosphere, as calculated by the formula reported in equation 4 of the main manuscript.
- <sup>19</sup>Amount of Water released into the atmosphere, as calculated by the formula reported in equation 4 of the main manuscript.
- <sup>20</sup>Amount of Diethyl ether released into the atmosphere, as calculated by the formula reported in equation 4 of the main manuscript.
- <sup>21</sup>End of life of liquid waste, including Acetone, Diethyl ether and water. The Ecoinvent process used was: Spent solvent mixture {Europe without Switzerland}| treatment of spent solvent mixture, hazardous waste incineration, with energy recovery | APOS, U.
- <sup>22</sup>End of life of the solid waste recovered after the filtration following the first part of the synthesis. The Ecoinvent process used was: Hazardous waste, for incineration {RoW}| treatment of hazardous waste, hazardous waste incineration, with energy recovery | APOS, U.

**Table S41.** Contributions to the Life Cycle Inventory (LCI) for the synthesis of 0.084 g of 4-butoxy-3-methoxybenzaldehyde. This is Reaction 18 (Run 6), carried in Acetonitrile as solvent with a reaction time of 8 hours, as reported in Table 1 in the main manuscript.

| Description |                      |                                 | Amount                  | Process Data Source                                                         |
|-------------|----------------------|---------------------------------|-------------------------|-----------------------------------------------------------------------------|
| Input       | Materials            | ACN                             | 15.66 g                 | Ecoinvent v 3.8 <sup>1</sup>                                                |
|             |                      | K <sub>2</sub> CO <sub>3</sub>  | 0.451 g                 | Ecoinvent v 3.8 <sup>2</sup>                                                |
|             |                      | KCl                             | 0 g                     | Ecoinvent v 3.8 <sup>3</sup>                                                |
|             |                      | Bromobutane                     | 0.465 g                 | Modelled from Ecoinvent v 3.8 database sub process as detailed in Table S23 |
|             |                      | Vanillin                        | 0.503 g                 | Modelled from Ecoinvent v 3.8 database sub process as detailed in Table S20 |
|             |                      | H <sub>2</sub> O                | 5 g                     | Ecoinvent v 3.8 <sup>4</sup>                                                |
|             |                      | Diethyl ether                   | 21.405 g                | Ecoinvent v 3.8 <sup>5</sup>                                                |
|             |                      | Mg <sub>2</sub> SO <sub>4</sub> | 1 g                     | Ecoinvent v 3.8 <sup>6</sup>                                                |
|             |                      | Silicon oil                     | 1.72*10 <sup>-2</sup> p | Ecoinvent v 3.8 <sup>7</sup>                                                |
|             | Equipment/<br>plants | Magnetic stirrer/heater         | 1.8*10 <sup>-4</sup> p  | Modelled from Ecoinvent v 3.8 database sub process as detailed in Table S18 |
|             |                      | Round bottom flask              | 3.47*10 <sup>-4</sup> p | Modelled from Ecoinvent v 3.8 database sub process as detailed in Table S15 |
|             |                      | Separatory funnel               | 2.33*10 <sup>-5</sup> p | Modelled from Ecoinvent v 3.8 database sub process as detailed in Table S9  |
|             |                      | Reflux condenser                | 3.12*10 <sup>-4</sup> p | Modelled from Ecoinvent v 3.8 database sub process as detailed in Table S13 |
|             |                      | Silicon oil container           | 3.47*10 <sup>-4</sup> p | Modelled from Ecoinvent v 3.8 database sub process as detailed in Table S6  |
|             |                      | Funnel                          | 2.90*10 <sup>-6</sup> p | Modelled from Ecoinvent v 3.8 database sub process as detailed in Table S8  |
|             |                      | Filter                          | 3.18*10 <sup>-6</sup> p | Modelled from Ecoinvent v 3.8 database                                      |

|             |                               |                           |                                                                                   |
|-------------|-------------------------------|---------------------------|-----------------------------------------------------------------------------------|
|             |                               |                           | sub process as detailed in Table S7                                               |
|             | Fitting reflux condenser      | $2.78 \cdot 10^{-4}$ p    | Modelled from Ecoinvent v 3.8 database sub process as detailed in Table S12       |
|             | Rubber tube                   | $5.56 \cdot 10^{-4}$ p    | Modelled from Ecoinvent v 3.8 database sub process as detailed in Table S14       |
|             | Activated carbon air filter   | $5.5 \cdot 10^{-4}$ p     | Modelled from Ecoinvent v 3.8 database sub process as detailed in Table S4        |
|             | Aspiration system             | $1.38 \cdot 10^{-4}$ p    | Modelled from Ecoinvent v 3.8 database sub process as detailed in Table S3        |
| Transport   | Transport for large equipment | $2.29 \cdot 10^{-2}$ tkm  | Ecoinvent v 3.8 <sup>8</sup>                                                      |
|             | Transport for raw materials   | 8.41 kgkm                 | Ecoinvent v 3.8 <sup>9</sup>                                                      |
|             | Transport for small equipment | $5.36 \cdot 10^{-1}$ kgkm | Ecoinvent v 3.8 <sup>10</sup>                                                     |
| Energy      | Electric energy               | 28.25 kJ                  | Ecoinvent v 3.8 <sup>11</sup>                                                     |
|             |                               | 1056 Wh                   | Ecoinvent v 3.8 <sup>12</sup>                                                     |
|             |                               | 11.37 kJ                  | Ecoinvent v 3.8 <sup>13</sup>                                                     |
|             |                               | 630 Wh                    | Ecoinvent v 3.8 <sup>14</sup>                                                     |
|             |                               | 500 Wh                    | Ecoinvent v 3.8 <sup>15</sup>                                                     |
|             |                               | 0.92 kWh                  | Ecoinvent v 3.8 <sup>16</sup>                                                     |
| Output      | Air emission                  | ACN                       | $4.28 \cdot 10^{-5}$ g<br>SimaPro airborne emission substance list <sup>17</sup>  |
|             |                               | HBr                       | $9.64 \cdot 10^{-4}$ g<br>SimaPro airborne emission substance list <sup>18</sup>  |
|             |                               | H <sub>2</sub> O          | $1.15 \cdot 10^{-6}$ g<br>SimaPro airborne emission substance list <sup>19</sup>  |
|             |                               | Diethyl ether             | $5.291 \cdot 10^{-4}$ g<br>SimaPro airborne emission substance list <sup>20</sup> |
| End of life | Spent solvent mixture         | 42.065 g                  | Ecoinvent v 3.8 <sup>21</sup>                                                     |
|             | Incineration                  | 1.451 g                   | Ecoinvent v 3.8 <sup>22</sup>                                                     |

<sup>1</sup>The Ecoinvent process used was: Acetonitrile {RER} | Sohio process | APOS, U.

- <sup>2</sup>The Ecoinvent process used was: Potassium carbonate {RER}| oxidation of manganese dioxide | APOS, U.
- <sup>3</sup>The Ecoinvent process used was: Potassium chloride {RER}| potassium chloride production | APOS, U. During the experimental work potassium iodide was used. Since it is not present in the database, potassium chloride was used as proxy.
- <sup>4</sup>The Ecoinvent process use was: Water, deionised {Europe without Switzerland}| water production, deionised | APOS, U.
- <sup>5</sup>The Ecoinvent process used was: Diethyl ether, without water, in 99.95% solution state {RER}| ethylene hydration | APOS, U.
- <sup>6</sup>The Ecoinvent process used was: Magnesium sulfate {RER}| production | APOS, U.
- <sup>7</sup>The Ecoinvent process used was: Silicone product {RER}| production | APOS, U.
- <sup>8</sup>Transport of large equipment (aspiration system and activated air carbon filter). The Ecoinvent process used was: Transport, freight, lorry 16-32 metric ton, EURO6 {RER}| transport, freight, lorry 16-32 metric ton, EURO6 | APOS, U. An average distance of 100km was considered.
- <sup>9</sup>Transport for reagents. The Ecoinvent process used was: Transport, freight, lorry 3.5-7.5 metric ton, EURO6 {RER}| transport, freight, lorry 3.5-7.5 metric ton, EURO6 | APOS, U. An average distance of 100km was considered.
- <sup>10</sup>Transport for small laboratory equipment. The Ecoinvent process used was: Transport, freight, lorry 3.5-7.5 metric ton, EURO6 {RER}| transport, freight, lorry 3.5-7.5 metric ton, EURO6 | APOS, U. An average distance of 100 km was considered.
- <sup>11</sup>Electric energy necessary for the heating up to 100°C of the reaction mixture containing ACN, Vanillin and Bromobutane. It is calculated using the expression  $m \cdot C_p \cdot DT$ , considering the specific heat in J/kg°C for each of the substances. The Ecoinvent process used was: Electricity, low voltage {IT}| electricity voltage transformation from medium to low voltage | APOS, U.
- <sup>12</sup>Electric energy necessary to maintain the heating at 100°C of the reaction mixture for 8 hours. It is calculated using the Fourier Equation. The Ecoinvent process used was: Electricity, low voltage {IT}| electricity voltage transformation from medium to low voltage | APOS, U.
- <sup>13</sup>Electric energy necessary to eliminate the remaining solvent (ACN) using the rotavapor. It is calculated as  $H_{vap}ACN \cdot molACN$ , considering  $H_{vap}ACN$  as its latent heat of vaporization (29.8 kJ/mol) and  $molACN$  as the moles of the solvent. The Ecoinvent process used was: Electricity, low voltage {IT}| electricity voltage transformation from medium to low voltage | APOS, U.
- <sup>14</sup>Electric energy necessary to use the heating stirrer during the workup phase for 1 hour. It is calculated as power\*time, considering 630W as the heating stirrer power. The Ecoinvent process used was: Electricity, low voltage {IT}| electricity voltage transformation from medium to low voltage | APOS, U.
- <sup>15</sup>Electric energy necessary to use the rotavapor after the workup phase for 1 hour. It is calculated as power\*time, considering 500W as the rotavapor power. The Ecoinvent process used was: Electricity, low voltage {IT}| electricity voltage transformation from medium to low voltage | APOS, U.
- <sup>16</sup>Electric energy necessary to the use of the aspiration system for the whole synthesis time, i.e. 11 h. The power was calculated by considering the air flow rate of 250 m<sup>3</sup>/h, a total load loss of 110.8076 kg/m<sup>2</sup>, and an efficiency of 90%: Electricity, low voltage {IT}| electricity voltage transformation from medium to low voltage | APOS, U.
- <sup>17</sup>Amount of ACN released into the atmosphere, as calculated by the formula reported in equation 4 of the main manuscript.
- <sup>18</sup>Amount of HBr released into the atmosphere, as calculated by the formula reported in equation 4 of the main manuscript.
- <sup>19</sup>Amount of Water released into the atmosphere, as calculated by the formula reported in equation 4 of the main manuscript.
- <sup>20</sup>Amount of Diethyl ether released into the atmosphere, as calculated by the formula reported in equation 4 of the main manuscript.
- <sup>21</sup>End of life of liquid waste, including ACN, Diethyl ether and water. The Ecoinvent process used was: Spent solvent mixture {Europe without Switzerland}| treatment of spent solvent mixture, hazardous waste incineration, with energy recovery | APOS, U.
- <sup>22</sup>End of life of the solid waste recovered after the filtration following the first part of the synthesis. The Ecoinvent process used was: Hazardous waste, for incineration {RoW}| treatment of hazardous waste, hazardous waste incineration, with energy recovery | APOS, U.

**Table S42.** Contributions to the Life Cycle Inventory (LCI) for the synthesis of 0.4324 g of 4-butoxy-3-methoxybenzaldehyde. This is Reaction 19 (Run 10), carried in DMF as solvent with a reaction time of 8 hours, as reported in Table 1 in the main manuscript.

| Description          |                         | Amount                          | Process Data Source                                                         |
|----------------------|-------------------------|---------------------------------|-----------------------------------------------------------------------------|
| Input                | Materials               | DMF                             | Ecoinvent v 3.8 <sup>1</sup>                                                |
|                      |                         | K <sub>2</sub> CO <sub>3</sub>  | Ecoinvent v 3.8 <sup>2</sup>                                                |
|                      |                         | KCl                             | Ecoinvent v 3.8 <sup>3</sup>                                                |
|                      |                         | Bromobutane                     | Modelled from Ecoinvent v 3.8 database sub process as detailed in Table S23 |
|                      |                         | Vanillin                        | Modelled from Ecoinvent v 3.8 database sub process as detailed in Table S20 |
|                      |                         | H <sub>2</sub> O                | Ecoinvent v 3.8 <sup>4</sup>                                                |
|                      |                         | Diethyl ether                   | Ecoinvent v 3.8 <sup>5</sup>                                                |
|                      |                         | Mg <sub>2</sub> SO <sub>4</sub> | Ecoinvent v 3.8 <sup>6</sup>                                                |
|                      |                         | Silicon oil                     | Ecoinvent v 3.8 <sup>7</sup>                                                |
|                      |                         |                                 |                                                                             |
| Equipment/<br>plants | Magnetic stirrer/heater | 1.8*10 <sup>-4</sup> p          | Modelled from Ecoinvent v 3.8 database sub process as detailed in Table S18 |
|                      | Round bottom flask      | 3.47*10 <sup>-4</sup> p         | Modelled from Ecoinvent v 3.8 database sub process as detailed in Table S15 |
|                      | Separatory funnel       | 2.33*10 <sup>-5</sup> p         | Modelled from Ecoinvent v 3.8 database sub process as detailed in Table S9  |
|                      | Reflux condenser        | 3.12*10 <sup>-4</sup> p         | Modelled from Ecoinvent v 3.8 database sub process as detailed in Table S13 |
|                      | Silicon oil container   | 3.47*10 <sup>-4</sup> p         | Modelled from Ecoinvent v 3.8 database sub process as detailed in Table S6  |
|                      | Funnel                  | 2.90*10 <sup>-6</sup> p         | Modelled from Ecoinvent v 3.8 database sub process as detailed in Table S8  |
|                      | Filter                  | 3.18*10 <sup>-6</sup> p         | Modelled from Ecoinvent v 3.8 database                                      |
|                      |                         |                                 |                                                                             |



|                             |                               |                            |                                                                             |                                                        |
|-----------------------------|-------------------------------|----------------------------|-----------------------------------------------------------------------------|--------------------------------------------------------|
|                             |                               |                            | sub process as detailed in Table S7                                         |                                                        |
| Fitting reflux condenser    |                               | 3.12*10 <sup>-4</sup> p    | Modelled from Ecoinvent v 3.8 database sub process as detailed in Table S12 |                                                        |
| Rubber tube                 |                               | 5.56*10 <sup>-4</sup> p    | Modelled from Ecoinvent v 3.8 database sub process as detailed in Table S14 |                                                        |
| Activated carbon air filter |                               | 5.5*10 <sup>-4</sup> p     | Modelled from Ecoinvent v 3.8 database sub process as detailed in Table S4  |                                                        |
| Aspiration system           |                               | 1.38*10 <sup>-4</sup> p    | Modelled from Ecoinvent v 3.8 database sub process as detailed in Table S3  |                                                        |
| Transport                   | Transport for large equipment | 2.29*10 <sup>-2</sup> tkm  | Ecoinvent v 3.8 <sup>8</sup>                                                |                                                        |
|                             | Transport for raw materials   | 6.72 kgkm                  | Ecoinvent v 3.8 <sup>9</sup>                                                |                                                        |
|                             | Transport for small equipment | 6.89*10 <sup>-2</sup> kgkm | Ecoinvent v 3.8 <sup>10</sup>                                               |                                                        |
| Energy                      | Electric energy               | 42.90 kJ                   | Ecoinvent v 3.8 <sup>11</sup>                                               |                                                        |
|                             |                               | 1440 Wh                    | Ecoinvent v 3.8 <sup>12</sup>                                               |                                                        |
|                             |                               | 3.015 kJ                   | Ecoinvent v 3.8 <sup>13</sup>                                               |                                                        |
|                             |                               | 630 Wh                     | Ecoinvent v 3.8 <sup>14</sup>                                               |                                                        |
|                             |                               | 500 Wh                     | Ecoinvent v 3.8 <sup>15</sup>                                               |                                                        |
|                             |                               | 0.92 kWh                   | Ecoinvent v 3.8 <sup>16</sup>                                               |                                                        |
| Output                      | Air emission                  | DMF                        | 7.28*10 <sup>-7</sup> g                                                     | SimaPro airborne emission substance list <sup>17</sup> |
|                             |                               | HBr                        | 4.41*10 <sup>-3</sup> g                                                     | SimaPro airborne emission substance list <sup>18</sup> |
|                             |                               | H <sub>2</sub> O           | 1.15*10 <sup>-6</sup> g                                                     | SimaPro airborne emission substance list <sup>19</sup> |
|                             |                               | Diethyl ether              | 5.291*10 <sup>-4</sup> g                                                    | SimaPro airborne emission substance list <sup>20</sup> |
| End of life                 | Spent solvent mixture         | 31.125 g                   | Ecoinvent v 3.8 <sup>21</sup>                                               |                                                        |
|                             | Incineration                  | 2.982 g                    | Ecoinvent v 3.8 <sup>22</sup>                                               |                                                        |

<sup>1</sup>The Ecoinvent process used was: N,N-dimethylformamide {RER} | production | APOS, U.

- <sup>2</sup>The Ecoinvent process used was: Potassium carbonate {RER}| oxidation of manganese dioxide | APOS, U.
- <sup>3</sup>The Ecoinvent process used was: Potassium chloride {RER}| potassium chloride production | APOS, U. During the experimental work potassium iodide was used. Since it is not present in the database, potassium chloride was used as proxy.
- <sup>4</sup>The Ecoinvent process use was: Water, deionised {Europe without Switzerland}| water production, deionised | APOS, U.
- <sup>5</sup>The Ecoinvent process used was: Diethyl ether, without water, in 99.95% solution state {RER}| ethylene hydration | APOS, U.
- <sup>6</sup>The Ecoinvent process used was: Magnesium sulfate {RER}| production | APOS, U.
- <sup>7</sup>The Ecoinvent process used was: Silicone product {RER}| production | APOS, U.
- <sup>8</sup>Transport of large equipment (aspiration system and activated air carbon filter). The Ecoinvent process used was: Transport, freight, lorry 16-32 metric ton, EURO6 {RER}| transport, freight, lorry 16-32 metric ton, EURO6 | APOS, U. An average distance of 100km was considered.
- <sup>9</sup>Transport for reagents. The Ecoinvent process used was: Transport, freight, lorry 3.5-7.5 metric ton, EURO6 {RER}| transport, freight, lorry 3.5-7.5 metric ton, EURO6 | APOS, U. An average distance of 100km was considered.
- <sup>10</sup>Transport for small laboratory equipment. The Ecoinvent process used was: Transport, freight, lorry 3.5-7.5 metric ton, EURO6 {RER}| transport, freight, lorry 3.5-7.5 metric ton, EURO6 | APOS, U. An average distance of 100 km was considered.
- <sup>11</sup>Electric energy necessary for the heating up to 100°C of the reaction mixture containing DMF, Vanillin and Bromobutane. It is calculated using the expression  $m \cdot C_p \cdot DT$ , considering the specific heat in J/kg°C for each of the substances. The Ecoinvent process used was: Electricity, low voltage {IT}| electricity voltage transformation from medium to low voltage | APOS, U.
- <sup>12</sup>Electric energy necessary to maintain the heating at 100°C of the reaction mixture for 8 hours. It is calculated using the Fourier Equation. The Ecoinvent process used was: Electricity, low voltage {IT}| electricity voltage transformation from medium to low voltage | APOS, U.
- <sup>13</sup>Electric energy necessary to eliminate the remaining solvent (DMF) using the rotavapor. It is calculated as  $H_{vap}DMF \cdot molDMF$ , considering  $H_{vap}DMF$  as its latent heat of vaporization (46.7 kJ/mol) and  $molDMF$  as the moles of the solvent. The Ecoinvent process used was: Electricity, low voltage {IT}| electricity voltage transformation from medium to low voltage | APOS, U.
- <sup>14</sup>Electric energy necessary to use the heating stirrer during the workup phase for 1 hour. It is calculated as power\*time, considering 630W as the heating stirrer power. The Ecoinvent process used was: Electricity, low voltage {IT}| electricity voltage transformation from medium to low voltage | APOS, U.
- <sup>15</sup>Electric energy necessary to use the rotavapor after the workup phase for 1 hour. It is calculated as power\*time, considering 500W as the rotavapor power. The Ecoinvent process used was: Electricity, low voltage {IT}| electricity voltage transformation from medium to low voltage | APOS, U.
- <sup>16</sup>Electric energy necessary to the use of the aspiration system for the whole synthesis time, i.e. 11 h. The power was calculated by considering the air flow rate of 250 m<sup>3</sup>/h, a total load loss of 110.8076 kg/m<sup>2</sup>, and an efficiency of 90%: Electricity, low voltage {IT}| electricity voltage transformation from medium to low voltage | APOS, U.
- <sup>17</sup>Amount of DMF released into the atmosphere, as calculated by the formula reported in equation 4 of the main manuscript.
- <sup>18</sup>Amount of HBr released into the atmosphere, as calculated by the formula reported in equation 4 of the main manuscript.
- <sup>19</sup>Amount of Water released into the atmosphere, as calculated by the formula reported in equation 4 of the main manuscript.
- <sup>20</sup>Amount of Diethyl ether released into the atmosphere, as calculated by the formula reported in equation 4 of the main manuscript.
- <sup>21</sup>End of life of liquid waste, including DMF, Diethyl ether and water. The Ecoinvent process used was: Spent solvent mixture {Europe without Switzerland}| treatment of spent solvent mixture, hazardous waste incineration, with energy recovery | APOS, U.
- <sup>22</sup>End of life of the solid waste recovered after the filtration following the first part of the synthesis. The Ecoinvent process used was: Hazardous waste, for incineration {RoW}| treatment of hazardous waste, hazardous waste incineration, with energy recovery | APOS, U.

## References

1. Douglass F. Taber, Shweta Patel, Travis M. Hambleton and Emma E. Winkel. Vanillin Synthesis from 4-Hydroxybenzaldehyde. *Journal of Chemical Education*, **2007**, v84 n7 p1158. <http://dx.doi.org/10.1021/ed084p1158>
2. Yoffe, D., Frim, R., Ukeles, S.D., Dagani, M. J., Barda, H.J., Benya, T.J., Sanders, D.C. Bromine Compounds. Bromine Componuds. *Ullmann's Encyclopedia of Industrial Chemistry*, 7<sup>th</sup> edition, **2013**, 1-31, doi: 10.1002/14356007.a04\_405.pub210.1002/14356007.a04\_405.pub2.
3. Williamson, K.L., Minard, R.D., Masters, K.M. *Macroscale and Microscale Organic Experiments*, 5<sup>th</sup> edition. Houghton Mifflin Company: Boston, **2007**.
